# Supplementary material for: Differences in Pregnancy Metabolic Profiles and Their Determinants between White European and South Asian Women: Findings from the Born in Bradford Cohort
Source: MDPI journal article supplement (doi:10.3390/metabo9090190), 2019-09-18
Supplement: s1 [file s1]

# Differences in pregnancy metabolic profiles and their determinants between White European and South Asian women: Findings from the Born in Bradford Cohort

Supplementary File 1:

## *Contents:*

*Pages 1-4:* Supplementary text and methods

*Pages 5-7:* Information in relation to the tricep skinfold measurement

*Page 8:* Study flowchart

*Pages 9-53:* Forest plots from regression models exploring associations of maternal exposures with pregnancy metabolic profiles

*Pages 54-59:* Correlation plots assessing agreement between regression models by linear fit (Figures S13-S18)

*Pages 60-69:* Sensitivity analysis 1: testing whether missing data is influencing results (Figures S19-S28)

*Pages 70-79:* Sensitivity analysis 2: testing whether ethnic groups with fewer women are influencing results (Figures S29-S38)

## **Supplementary text and methods**

### **Text S1. Born in Bradford laboratory processing of maternal serum samples.**

#### **Isolation of serum prior to storage**

Venous blood was collected in GEL tubes to obtain serum. The following processing steps were undertaken prior to storage of serum at -80°C

- 1) Storage racks were prepared.
- 2) Participant details were checked, making sure that both the BiB study ID and Hospital number on the specimen bottles matched those on the tracking forms.
- 3) Tubes were centrifuged at 3500 rpm for 10 minutes at room temperature.
- 4) A 1 ml automatic pipette was used to aliquot serum into 2 x 1.5 ml vials.
- 5) Vials were labelled with appropriate BiB study labels and placing the duplicate barcode label in corresponding space marked on BiB tracking form.
- 6) Serum aliquots (n = 3) were then placed in racks in a -80 °C freezer.

### **Text S2. Nuclear Magnetic Resonance (NMR) Spectroscopy Methods**

The NMR spectroscopy methodology is summarised in Figure S1 below and the metabolites that were quantified, together with the units in which they are quantified, are shown in Supplementary File 2. This NMR-based metabolite quantification is achieved through measurements of three molecular windows from each serum sample. Two of the spectra (LIPO and LMWM windows) are acquired from native serum and one spectrum from serum lipid extracts (LIPID window). The NMR spectra are measured using Bruker AVANCE III spectrometer operating at 500 or 600 MHz. Measurements of native serum samples and serum lipid extracts are conducted at 37°C and 22°C, respectively.

The LIPO window represents a standard spectrum of human serum displaying broad overlapping resonances arising from lipid molecules in various lipoprotein particles. The LIPO data are recorded using 8 transients acquired using a NOESY-presat pulse sequence with mixing time of 10ms and water peak suppression. The LMWM window includes signals from various low-molecular-weight molecules. The LMWM spectrum is recorded using a relaxation-filtered pulse sequence that suppresses most of the broad macromolecule and lipid signals to enhance detection of small solutes. Specifically, a Carr-Purcell-Meiboom-Gill (CPMG) pulse sequence with a 78ms T<sub>2</sub>-filter and fixed echo delay of 403µs is applied using 24 transients. The LIPID window of the serum extracts is acquired with a standard 1D spectrum using 32 transients.

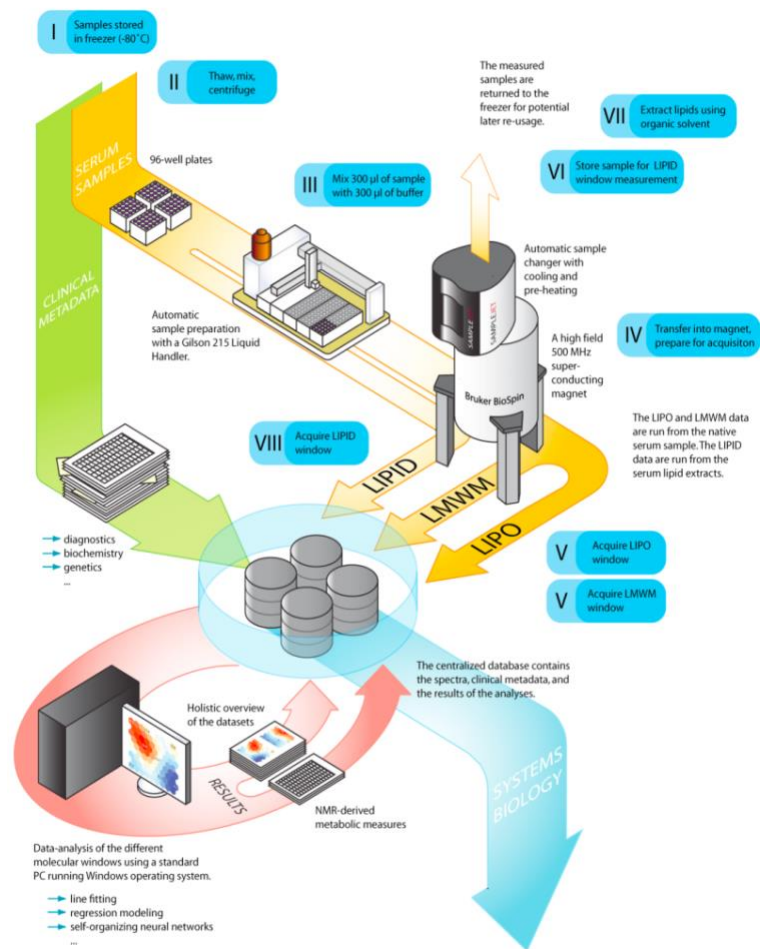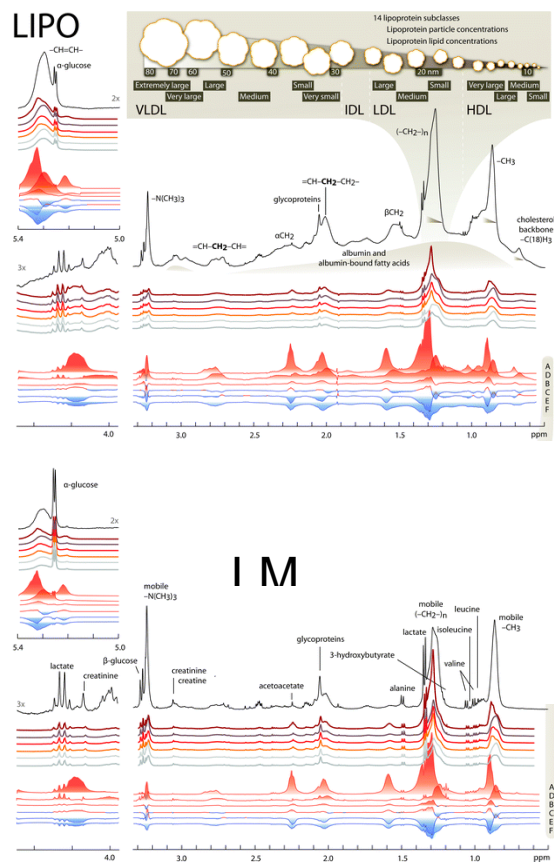

**Figure S1.** Stages and methods used for NMR platform metabolic measures (adapted from Wurtz et al.)

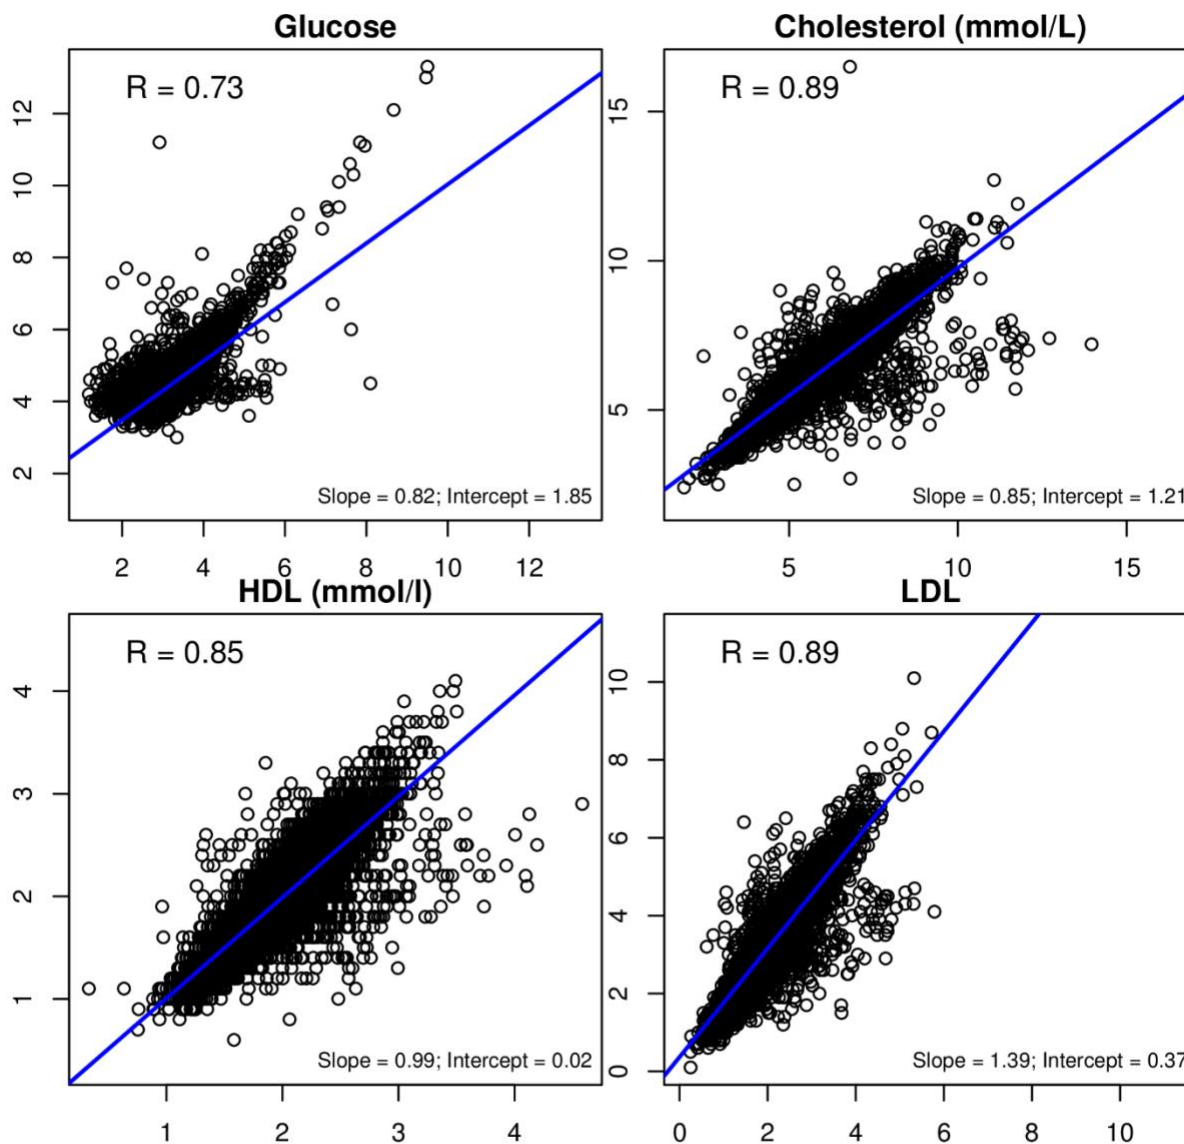

Nuclear Magnetic Resonance



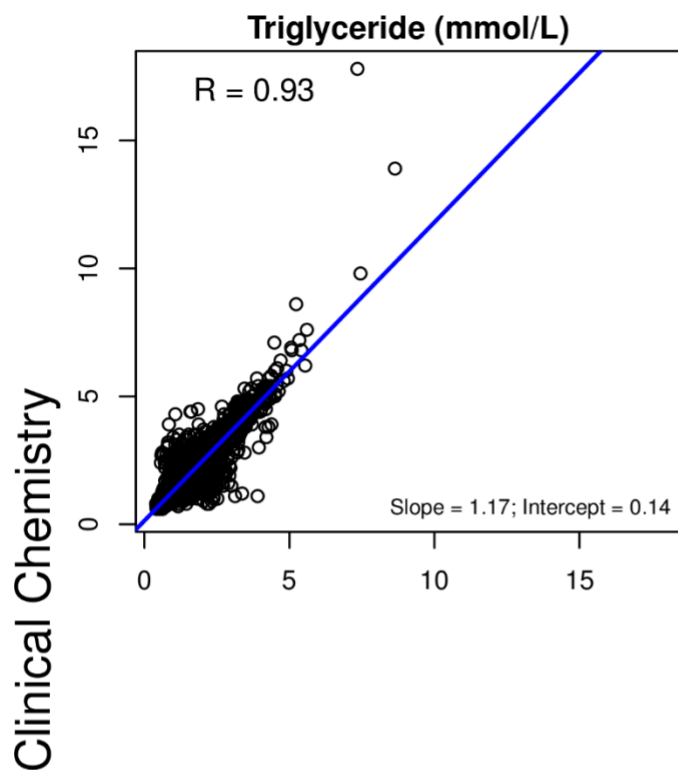

## Nuclear Magnetic Resonance

**Figure S2.** Comparison of lipoprotein lipids and glucose quantification using nuclear magnetic resonance (NMR) (x-axis) and routine clinical chemistry assays (y-axis) (N= 11,026 to 11,337). R= correlation coefficient.

**Table S1.** Distributions of maternal characteristics during pregnancy by ethnicity for the sub cohort of women who had a tricep skinfold thickness measurement

| Maternal characteristics          |                  | All<br>(n = 3,103) | White European<br>(n = 2,181) | South Asian<br>(n = 922) | Diff in means<br>or OR (95%<br>CI)* |
|-----------------------------------|------------------|--------------------|-------------------------------|--------------------------|-------------------------------------|
| TST, mm                           |                  | 25.4 ± 7.1         | 25.7 ± 7.2                    | 24.6 ± 6.9               | 1.1 (0.5, 1.6)                      |
| Age, years                        |                  | 27.0 ± 5.8         | 26.8 ± 6.0                    | 27.5 ± 5.0               | 0.7 (0.3, 1.1)                      |
| Height, cm                        |                  | 162.9 ± 6.4        | 164.3 ± 6.1                   | 159.5 ± 5.7              | 4.8 (4.3, 5.2)                      |
| BMI, kg/m <sup>2</sup>            |                  | 25.9 ± 5.5         | 26.6 ± 5.6                    | 24.4 ± 4.7               | 2.2 (1.8, 2.6)                      |
| Education                         | Below A-level    | 1794 (58.70)       | 1321 (61.5)                   | 473 (52.0)               | Ref                                 |
|                                   | A-level or above | 1262 (41.3)        | 826 (38.5)                    | 436 (48.0)               | 1.5 (1.3, 1.7)                      |
| HDP                               | Normotensive     | 2762 (89.0)        | 1887 (86.5)                   | 875 (94.9)               | Ref                                 |
|                                   | PE               | 80 (2.6)           | 65 (3.0)                      | 15 (1.6)                 | 0.5 (0.3, 0.9)                      |
|                                   | GHT              | 258 (8.3)          | 226 (10.4)                    | 32 (3.5)                 | 0.3 (0.2, 0.4)                      |
| Gestational diabetes              | Yes              | 169 (5.4)          | 98 (4.5)                      | 71 (7.7)                 | 1.8 (1.3, 2.4)                      |
| Parity                            | Nulliparous      | 1370 (46.4)        | 1030 (49.3)                   | 340 (39.5)               | Ref                                 |
|                                   | Multiparous      | 1581 (53.6)        | 1060 (50.7)                   | 521 (60.5)               | 1.5 (1.3, 1.7)                      |
| Gest age at blood sampling, weeks |                  | 26.3               | 26.3                          | 26.3                     | 0                                   |

BMI, body mass index. TST, tricep skinfold thickness; Diff, difference; OR, odds ratio; Gest, gestational. Data are means ± SD or *n* (%). \*Difference in mean calculated for continuous variables and odds ratio calculated for categorical variables: an odds ratio >1 indicates a higher exposure rate in South Asian women.

**Table S2.** Distributions of maternal characteristics during pregnancy for White European women stratified by whether they had a tricep skinfold measurement or not

| Maternal characteristics          |                  | Women with TST measurement<br>(n = 2,181) | Women without TST measurement<br>(n = 1,891) | Diff in means or OR (95% CI)* |
|-----------------------------------|------------------|-------------------------------------------|----------------------------------------------|-------------------------------|
| Age, years                        |                  | 26.8 ± 6.0                                | 26.6 ± 6.0                                   | 0.2 (-0.2, 0.6)               |
| Height, cm                        |                  | 164.3 ± 6.1                               | 164.1 ± 6.3                                  | 0.2 (-0.2, 0.5)               |
| BMI, kg/m <sup>2</sup>            |                  | 26.6 ± 5.6                                | 26.8 ± 6.4                                   | 0.2 (-0.2, 0.4)               |
| Education                         | Below A-level    | 1321 (61.5)                               | 1141 (62.1)                                  | Ref                           |
|                                   | A-level or above | 826 (38.5)                                | 697 (37.9)                                   | 1.0 (0.9, 1.1)                |
| HDP                               | Normotensive     | 1887 (86.5)                               | 1646 (87.0)                                  | Ref                           |
|                                   | PE               | 65 (3.0)                                  | 53 (2.8)                                     | 0.9 (0.6, 1.4)                |
|                                   | GHT              | 226 (10.4)                                | 191 (10.1)                                   | 1.0 (0.8, 1.2)                |
| Gestational diabetes              | Yes              | 98 (4.5)                                  | 111 (5.9)                                    | 1.3 (1.0, 1.7)                |
| Parity                            | Nulliparous      | 1030 (49.3)                               | 908 (49.1)                                   | Ref                           |
|                                   | Multiparous      | 1060 (50.7)                               | 940 (50.9)                                   | 1.0 (0.9, 1.1)                |
| Gest age at blood sampling, weeks |                  | 26.3                                      | 26.2                                         | 0.1 (-0.7, 0.15)              |

BMI, body mass index. TST, tricep skinfold thickness; Diff, difference; OR, odds ratio; Gest, gestational. Data are means ± SD or *n* (%). \*Difference in mean calculated for continuous variables and odds ratio calculated for categorical variables: an odds ratio >1 indicates a higher exposure rate in women without measurement.

**Table S3.** Distributions of maternal characteristics during pregnancy for South Asian women stratified by whether they had a tricep skinfold measurement or not

| Maternal characteristics          |                  | Women with TST measurement (n = 922) | Women without TST measurement (n = 3,780) | Diff in means or OR (95% CI)* |
|-----------------------------------|------------------|--------------------------------------|-------------------------------------------|-------------------------------|
| Age, years                        |                  | 27.5 ± 5.0                           | 27.9 ± 5.2                                | 0.4 (0.0, 0.8)                |
| Height, cm                        |                  | 159.5 ± 5.7                          | 159.5 ± 5.8                               | 0                             |
| BMI, kg/m2                        |                  | 24.4 ± 4.7                           | 25.9 ± 5.5                                | 1.5 (1.2, 1.9)                |
| Education                         | Below A-level    | 473 (52.0)                           | 2216 (59.8)                               | Ref                           |
|                                   | A-level or above | 436 (48.0)                           | 1487 (40.2)                               | 0.7 (0.6, 0.8)                |
| HDP                               | Normotensive     | 875 (94.9)                           | 3494 (92.4)                               | Ref                           |
|                                   | PE               | 15 (1.6)                             | 91 (2.4)                                  | 1.5 (0.9, 2.6)                |
|                                   | GHT              | 32 (3.5)                             | 185 (4.9)                                 | 1.4 (0.9, 2.1)                |
| Gestational diabetes              | Yes              | 71 (7.7)                             | 454 (12.0)                                | 1.6 (1.3, 2.1)                |
| Parity                            | Nulliparous      | 340 (39.5)                           | 1155 (31.5)                               | Ref                           |
|                                   | Multiparous      | 521 (60.5)                           | 2516 (68.5)                               | 1.4 (1.2, 1.7)                |
| Gest age at blood sampling, weeks |                  | 26.3                                 | 26.3                                      | 0                             |

BMI, body mass index. TST, tricep skinfold thickness; Diff, difference; OR, odds ratio; Gest, gestational. Data are means ± SD or *n* (%). \*Difference in mean calculated for continuous variables and odds ratio calculated for categorical variables: an odds ratio >1 indicates a higher exposure rate in women without measurement.

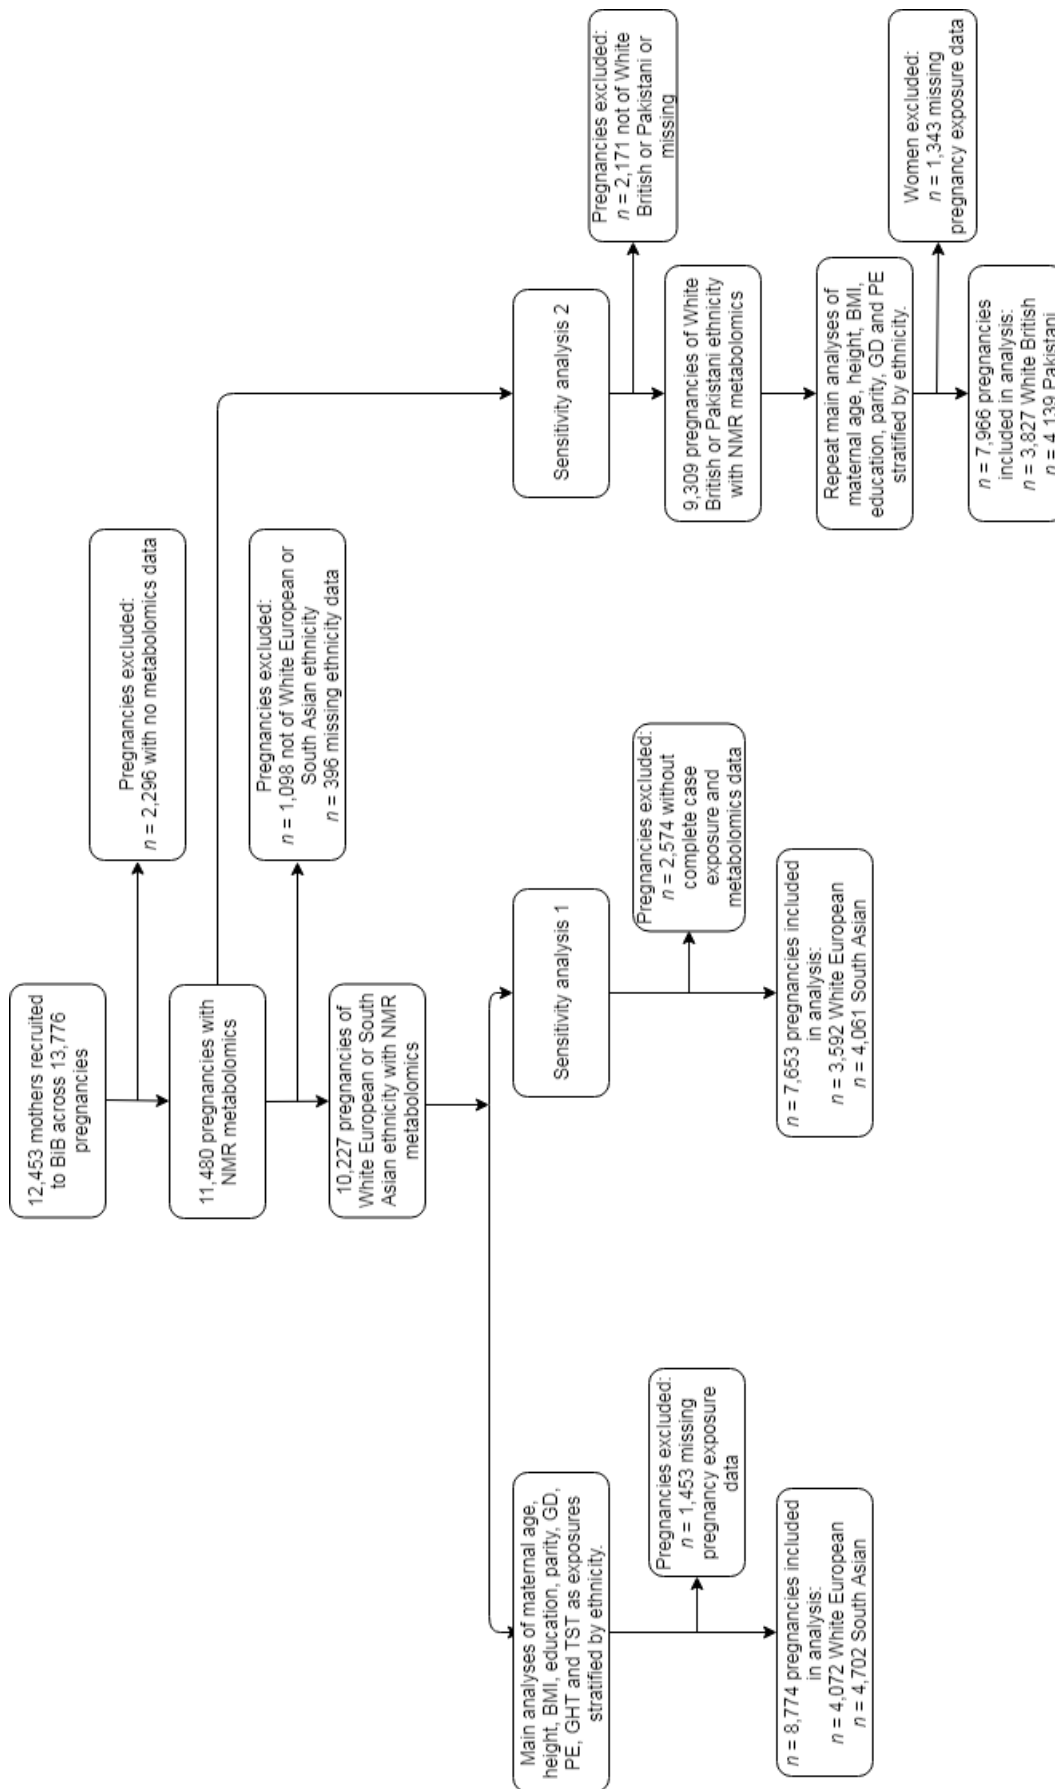

Figure S3. Study flow chart

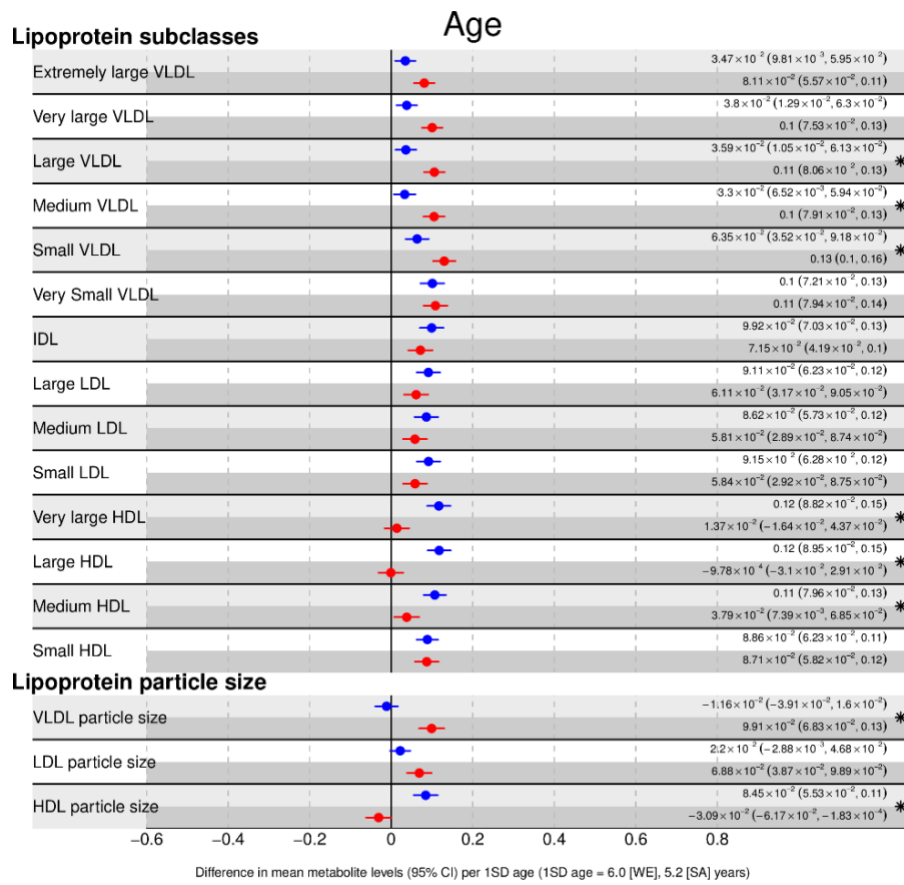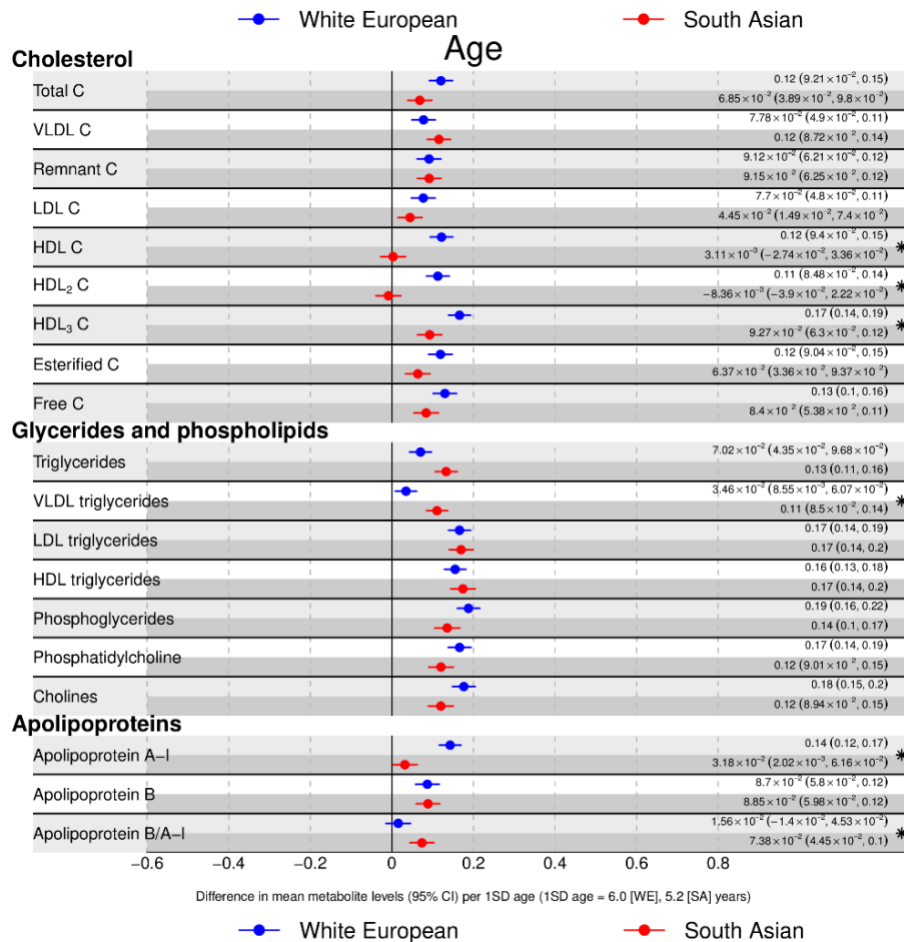

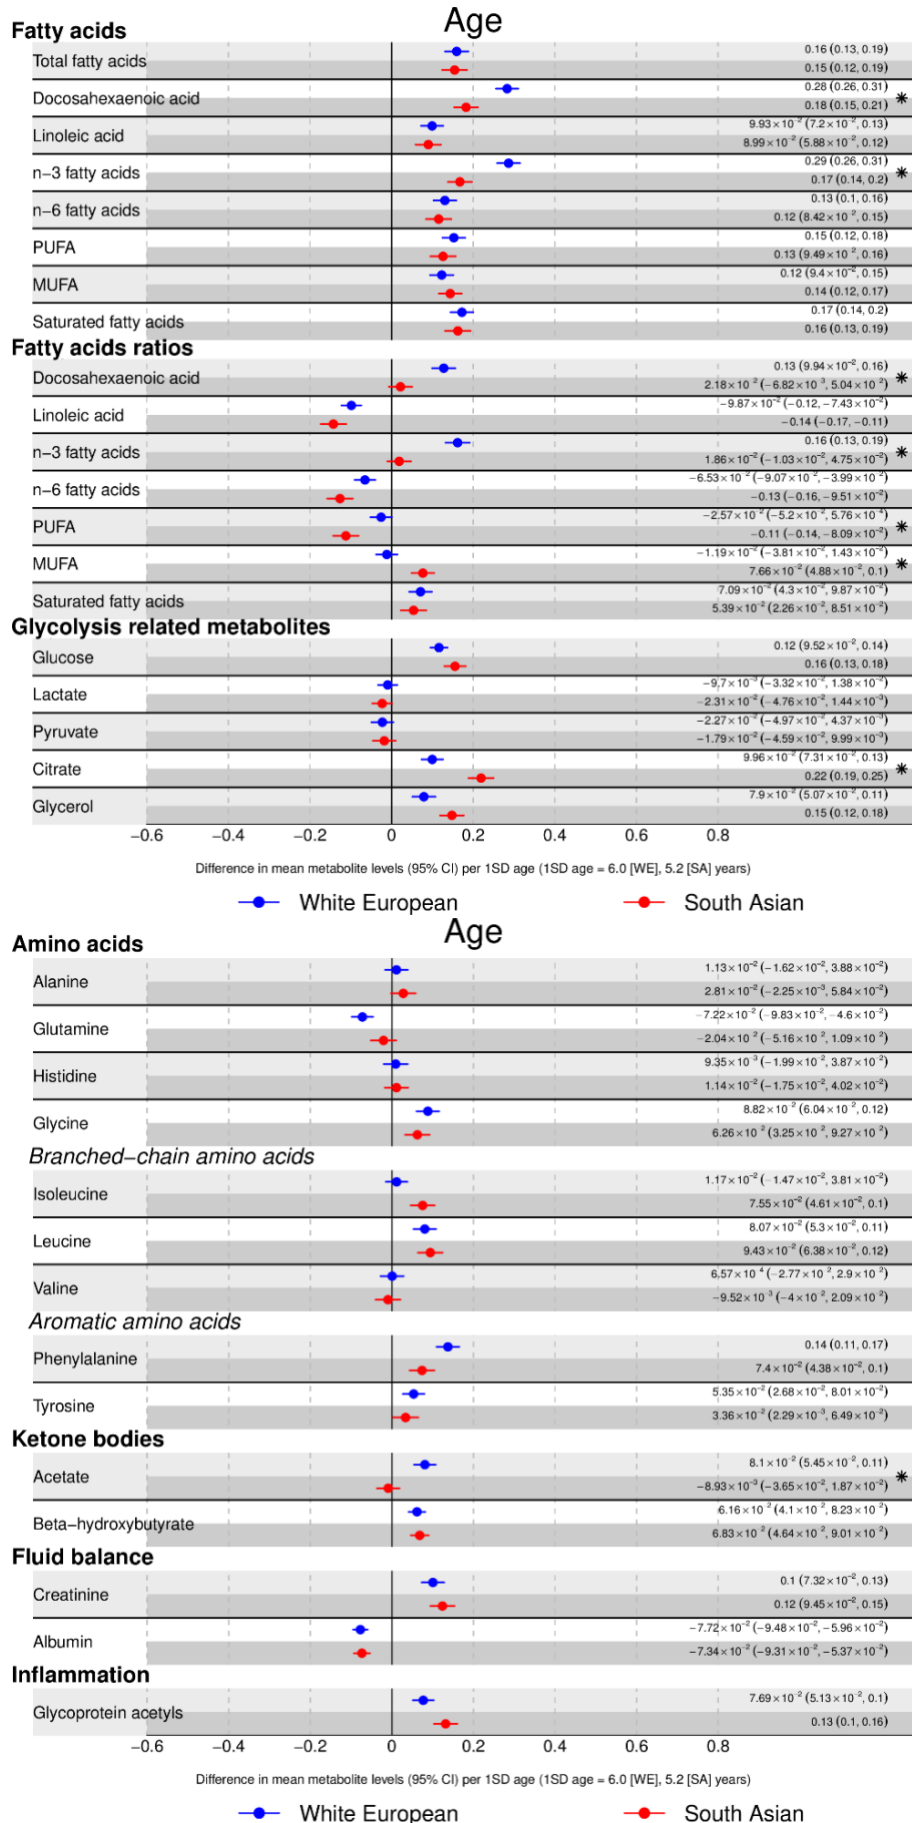

**Figure S4. Associations of maternal age with pregnancy metabolic profiles stratified by ethnicity.** Data points show SD differences for White European (blue) and South Asian (red) women. Error bars = 95% confidence intervals. Exact point estimates and their corresponding 95% CIs are displayed in text to the right of each point. \* denotes strong statistical evidence from the interaction test ( $P_{\text{interaction}} < 0.001$ ). Differences in quantified units (mostly mmol/l) are listed in Supplementary File 2. Abbreviations: VLDL, very low-density lipoprotein; LDL, low-density lipoprotein; HDL, high-density lipoprotein; C, cholesterol; MUFA, monounsaturated fatty acids; PUFA, polyunsaturated fatty acids



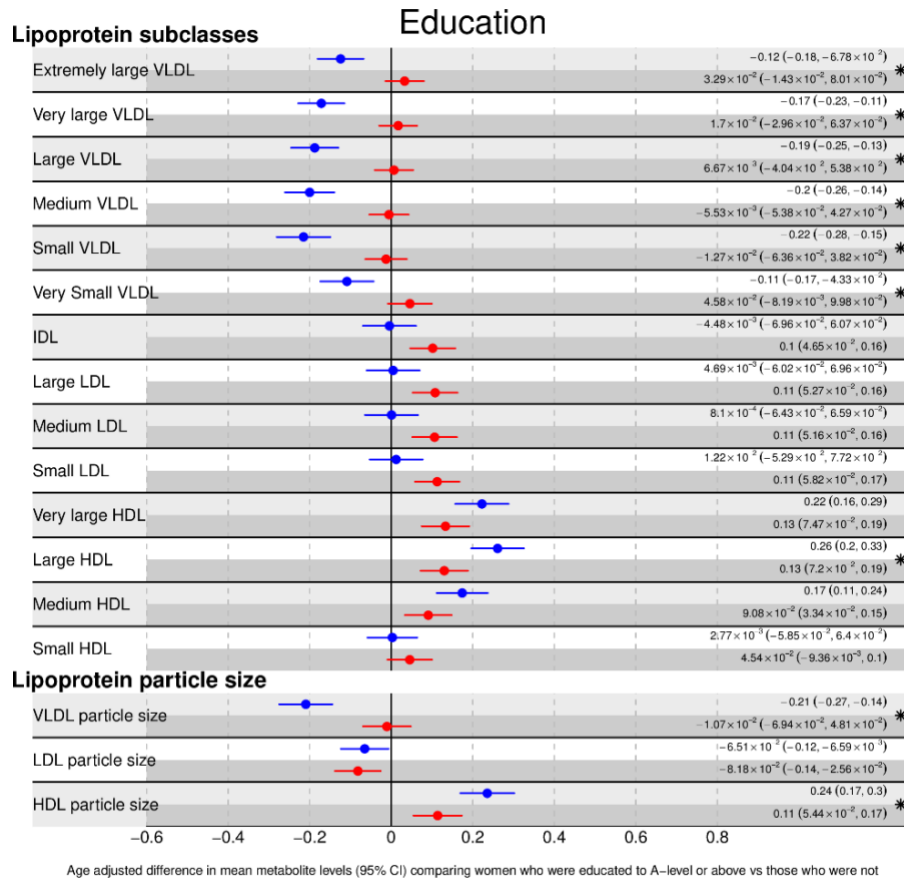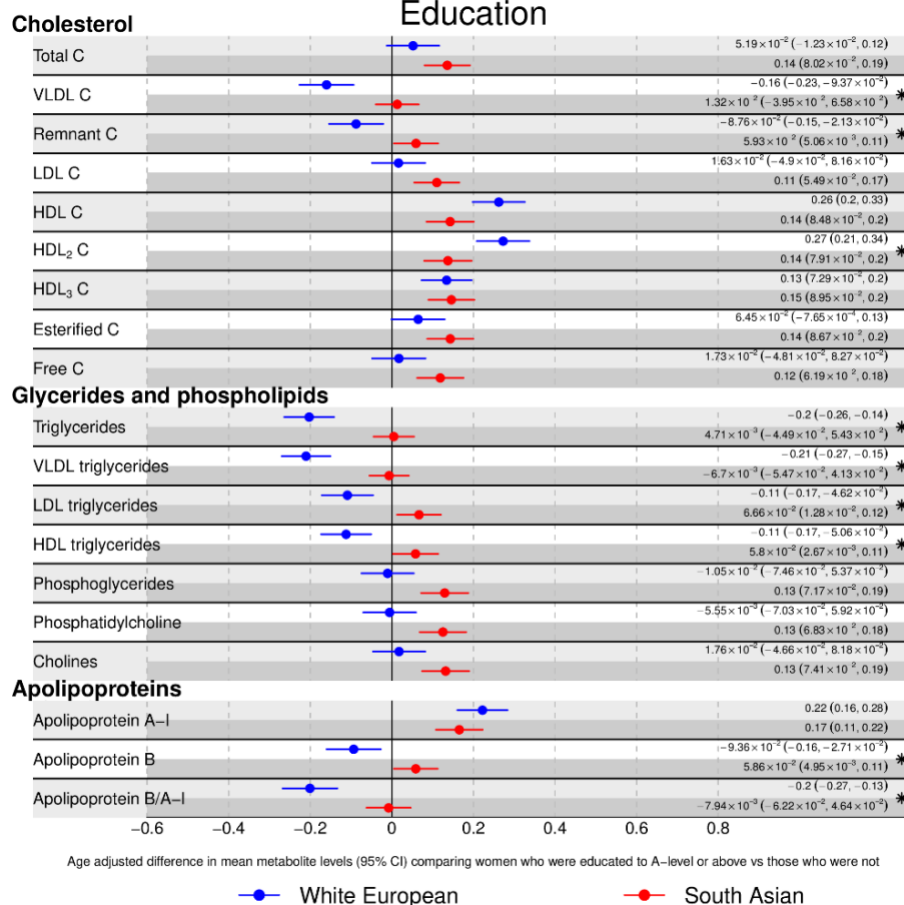

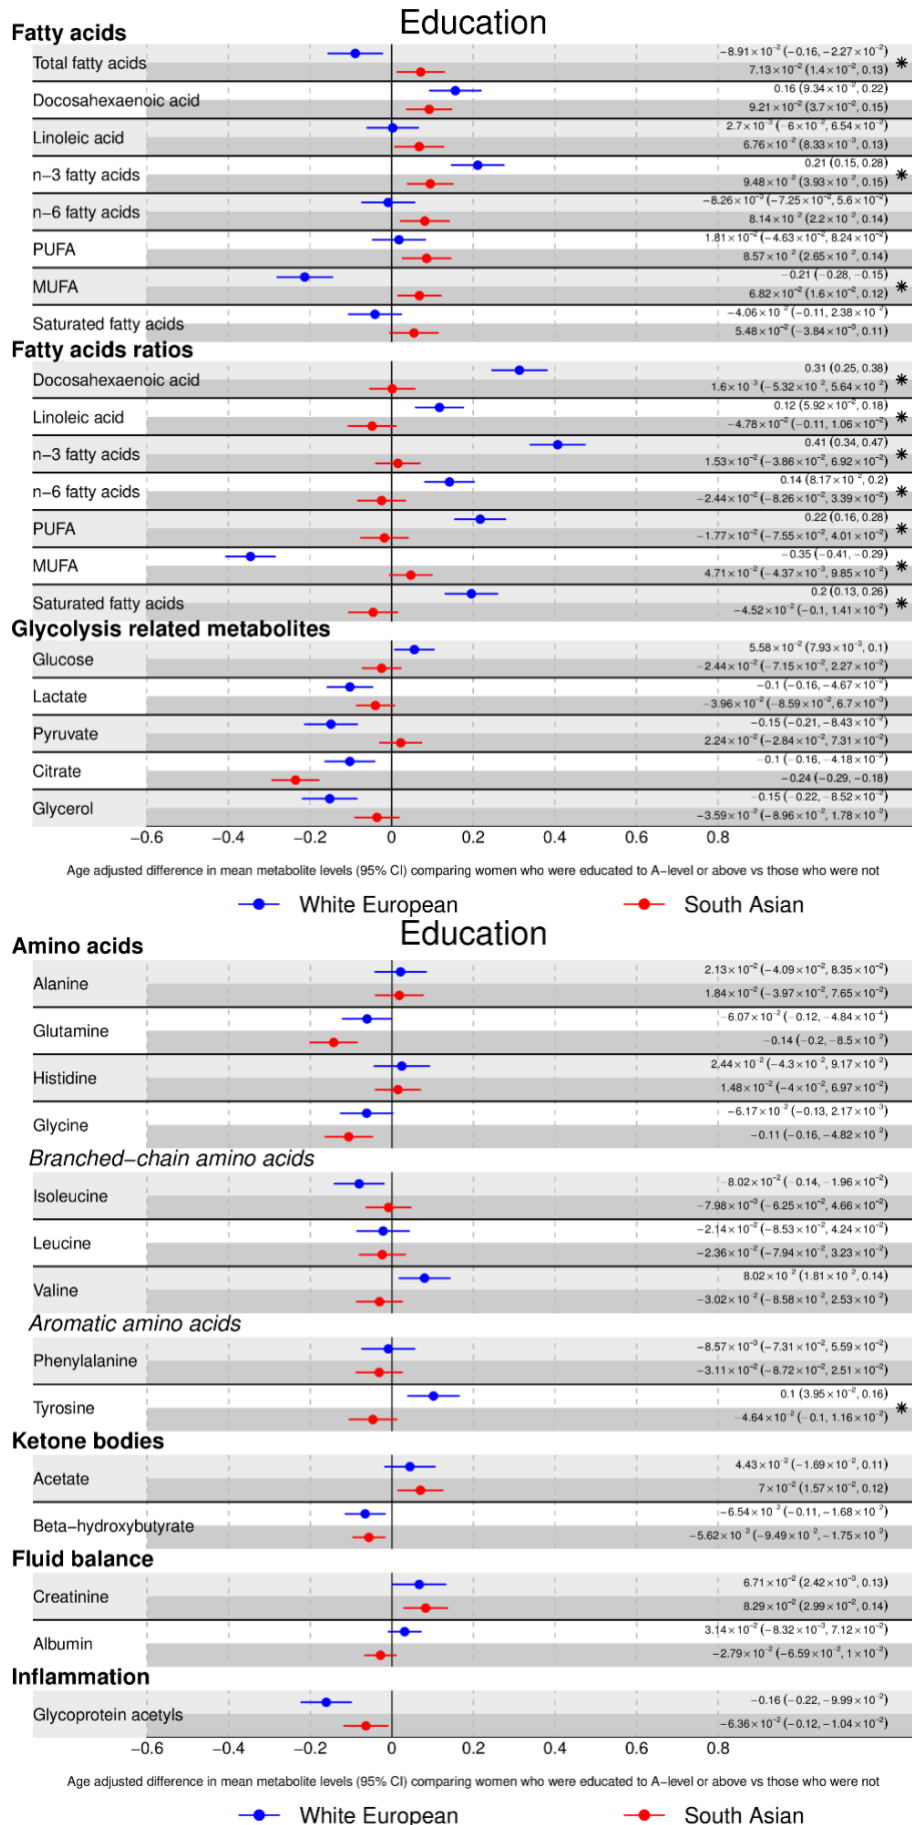

**Figure S5. Age-adjusted associations of maternal education with pregnancy metabolic profiles stratified by ethnicity.** Data points show SD differences for White European (blue) and South Asian (red) women. Error bars = 95% confidence intervals. Exact point estimates and their corresponding 95% CIs are displayed in text to the right of each point. \* denotes strong statistical evidence from the interaction test ( $P_{\text{interaction}} < 0.001$ ). Differences in quantified units (mostly mmol/l) are listed in Supplementary File 2. Abbreviations: VLDL, very low-density lipoprotein; LDL, low-density lipoprotein; HDL, high-density lipoprotein; C, cholesterol; MUFA, monounsaturated fatty acids; PUFA, polyunsaturated fatty acids

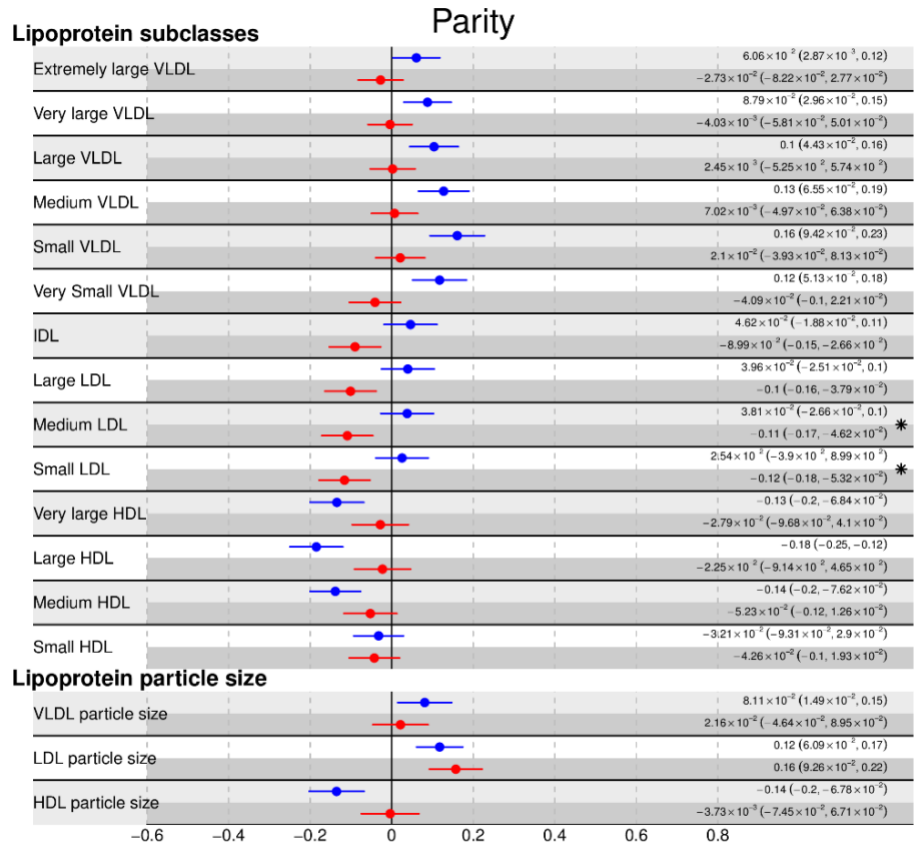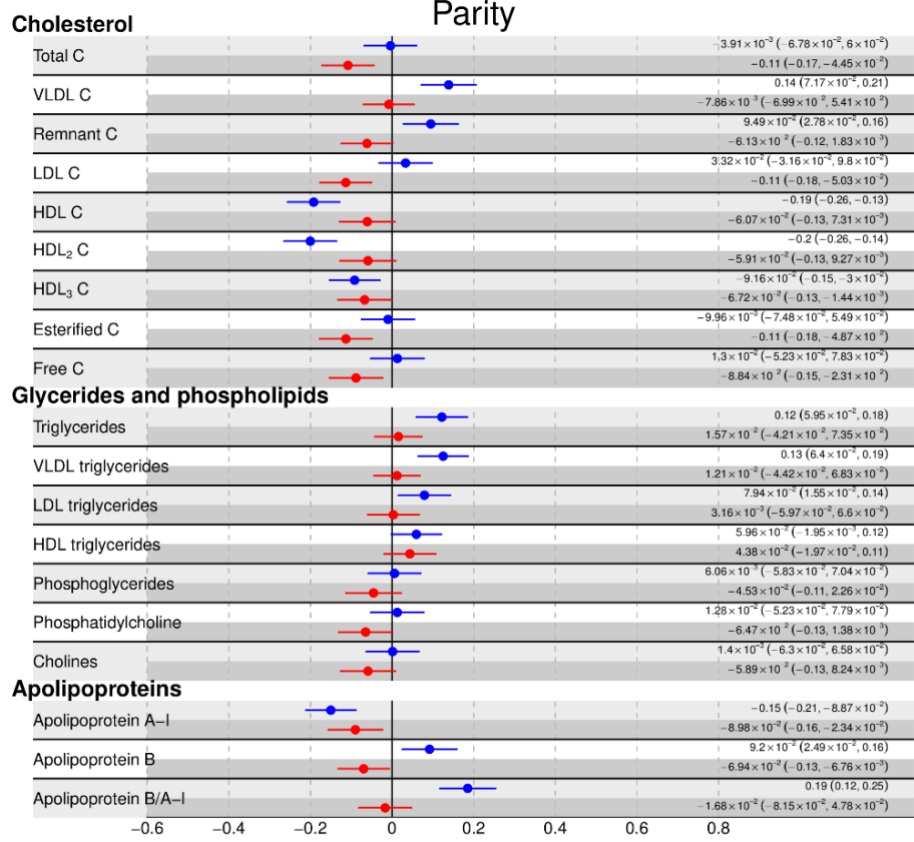

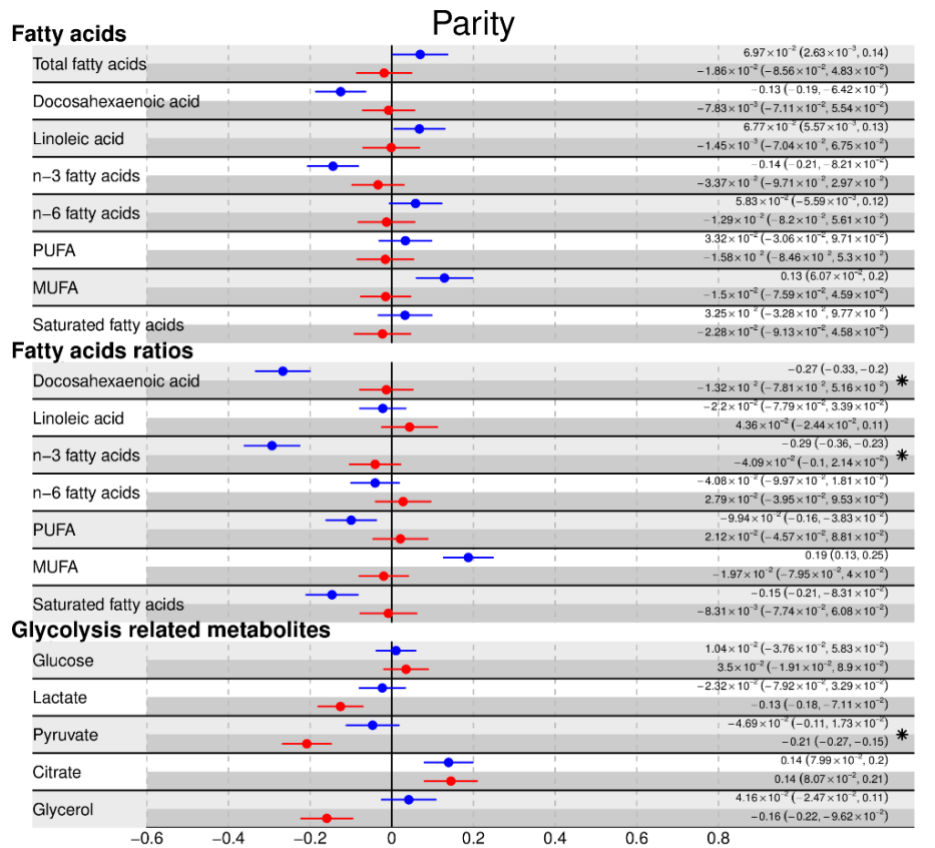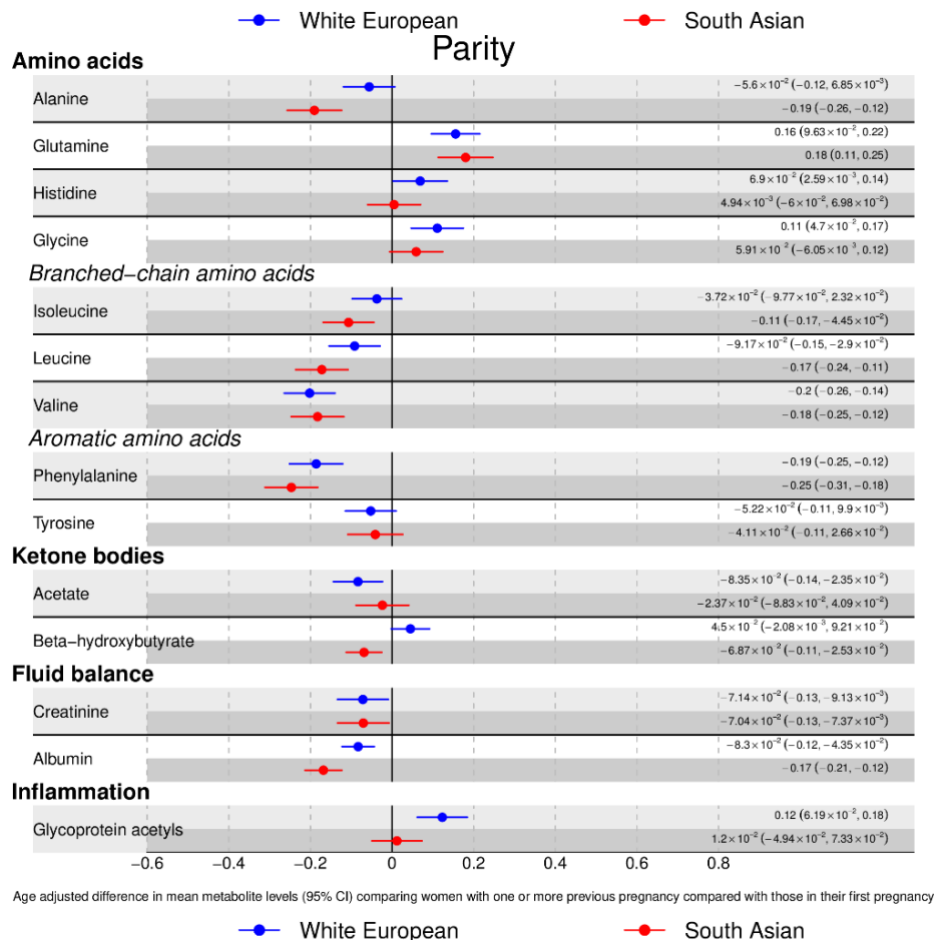

**Figure S6. Age-adjusted associations of maternal parity with pregnancy metabolic profiles stratified by ethnicity.** Data points show SD differences for White European (blue) and South Asian (red) women. Error bars = 95% confidence intervals. Exact point estimates and their corresponding 95% CIs are displayed in text to the right of each point. \* denotes strong statistical evidence from the interaction test ( $P_{\text{interaction}} < 0.001$ ). Differences in quantified units (mostly mmol/l) are listed in Supplementary File 2. Abbreviations: VLDL, very low-density lipoprotein; LDL, low-density lipoprotein; HDL, high-density lipoprotein; C, cholesterol; MUFA, monounsaturated fatty acids; PUFA, polyunsaturated fatty acids

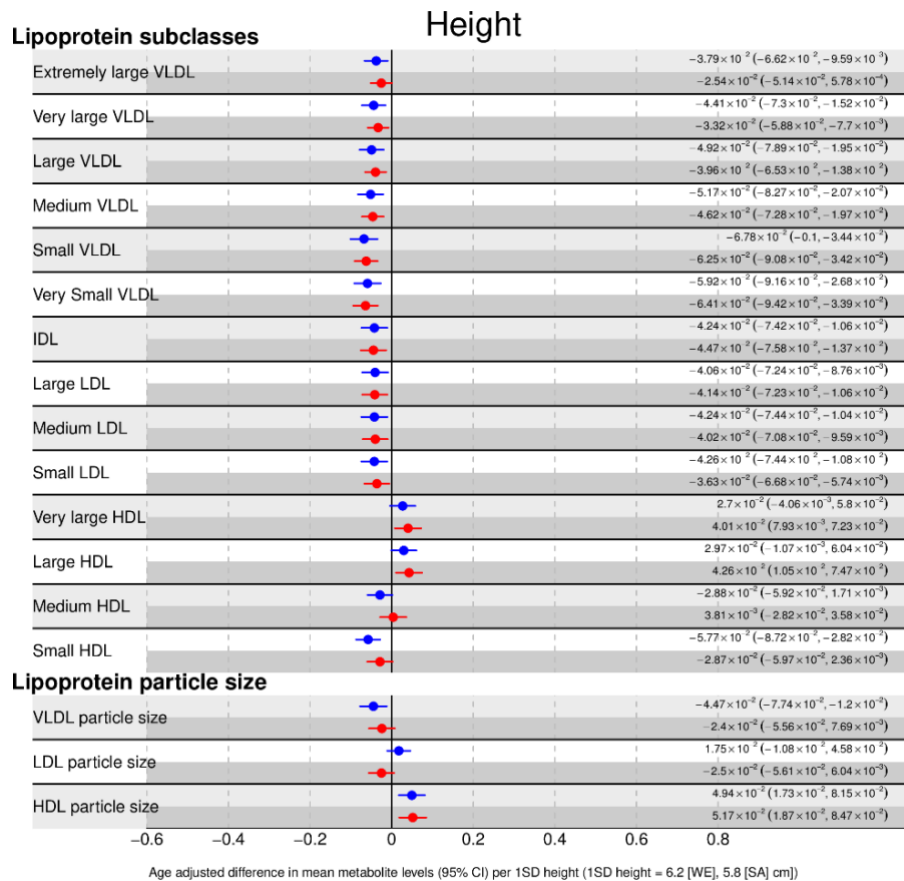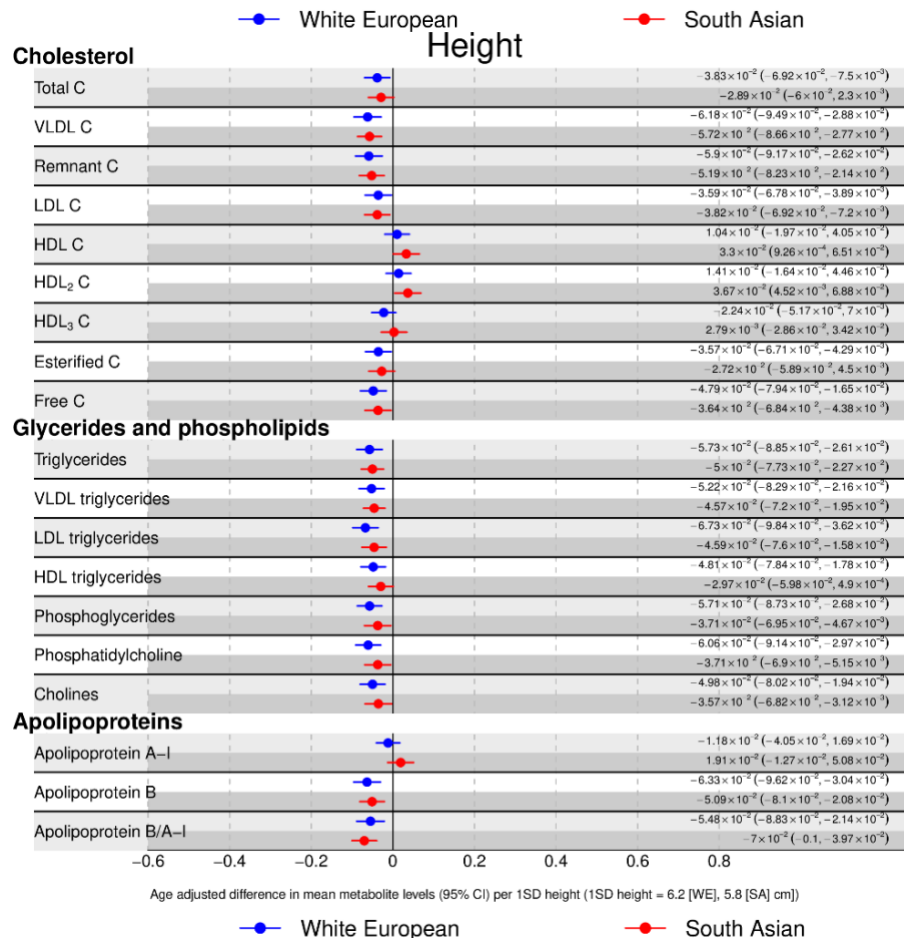

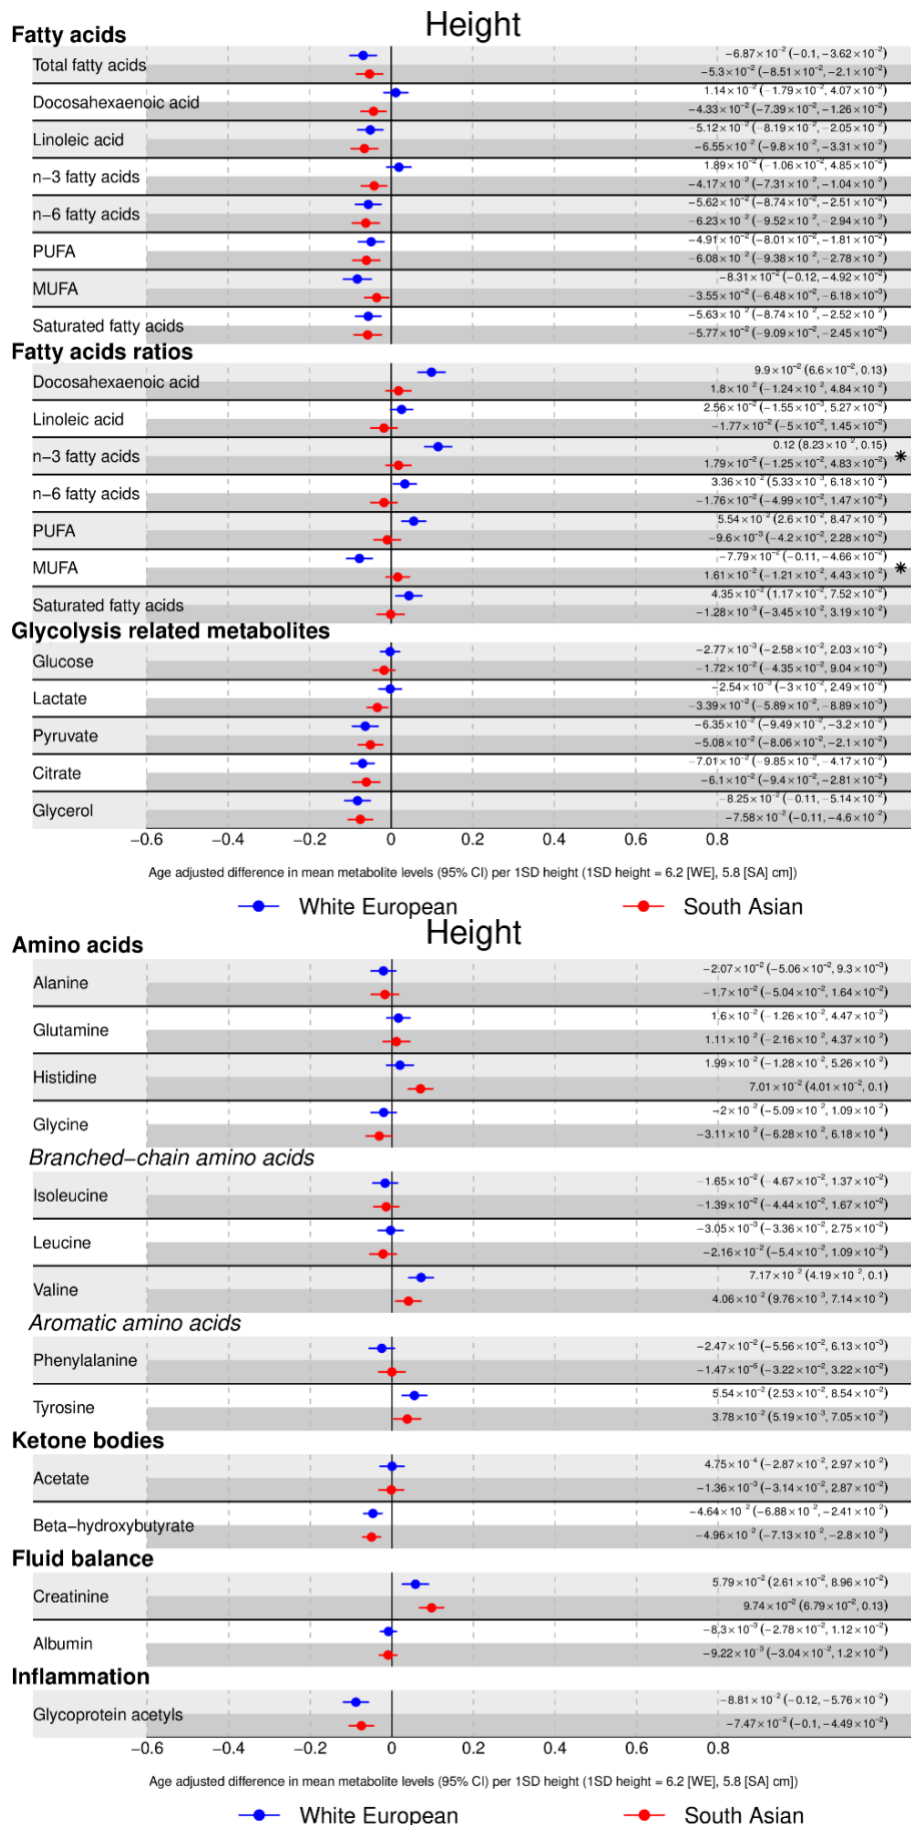



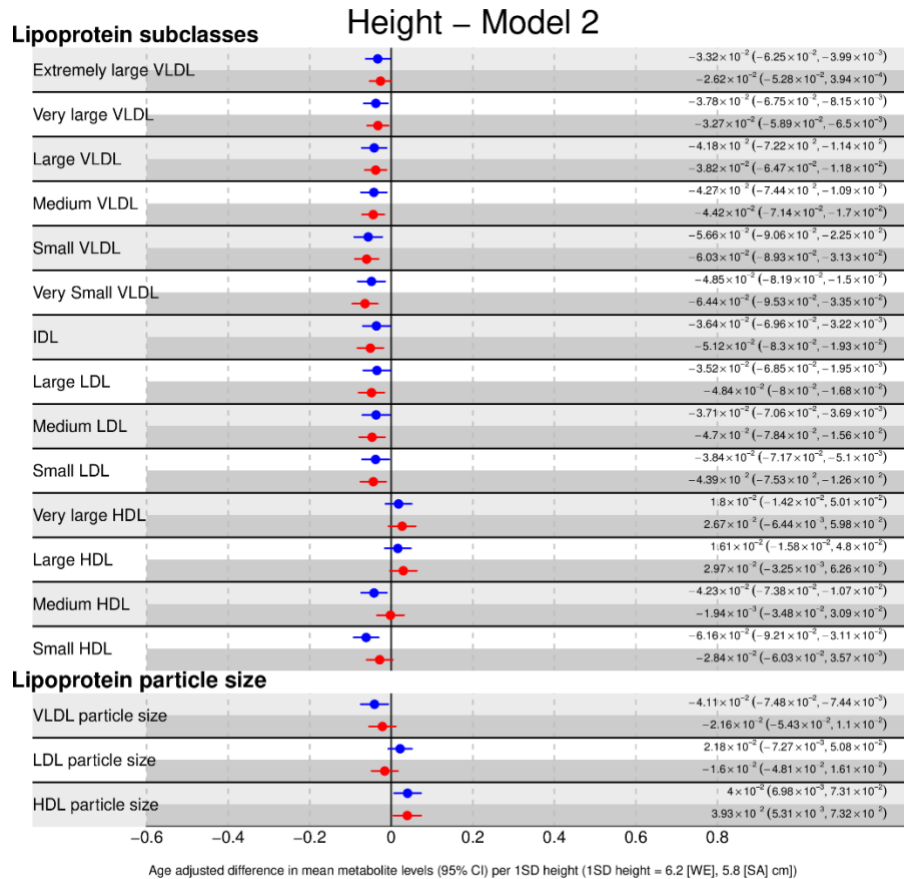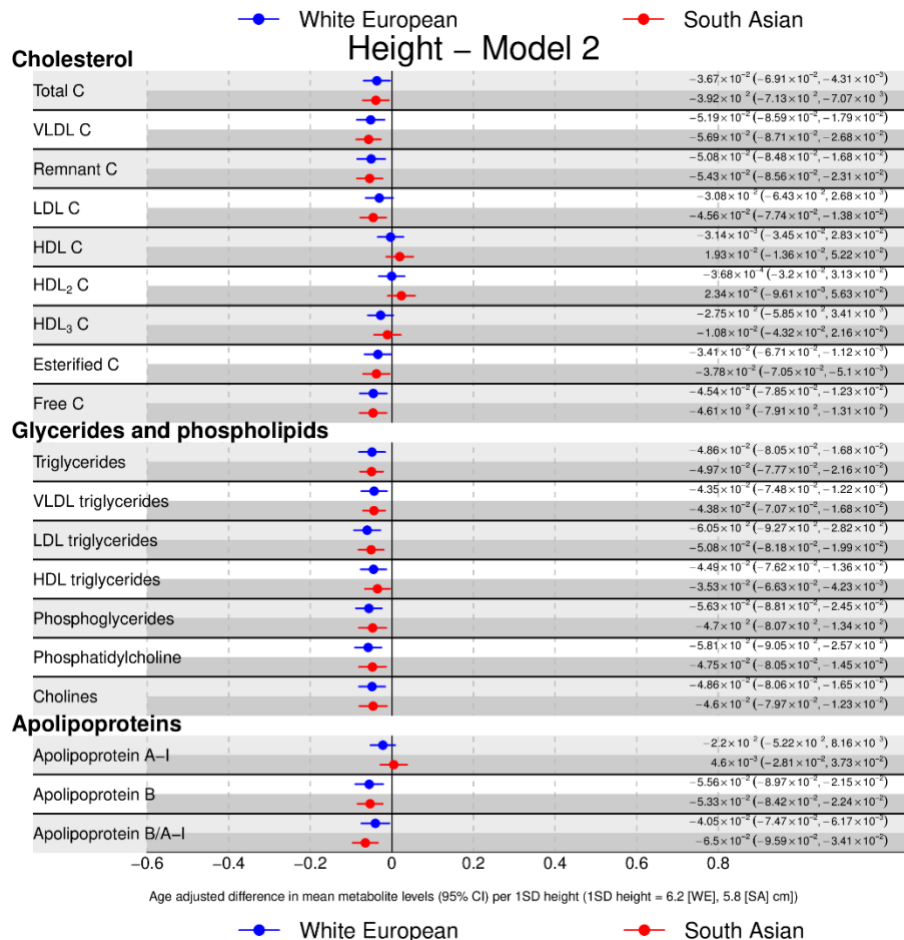

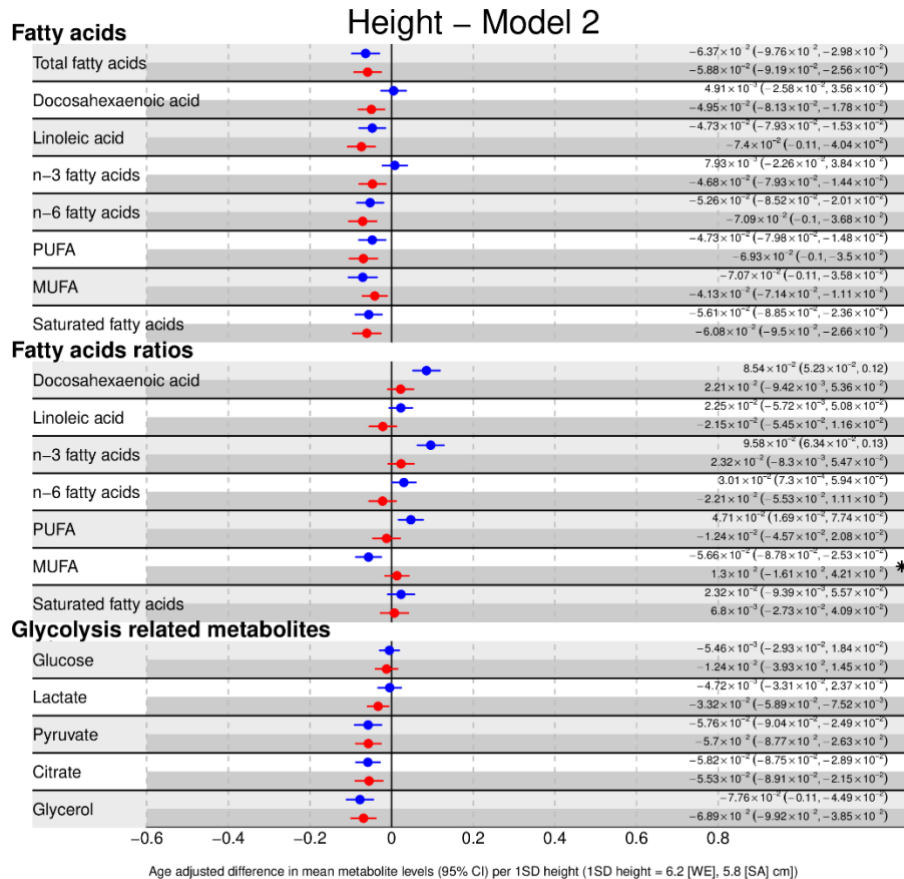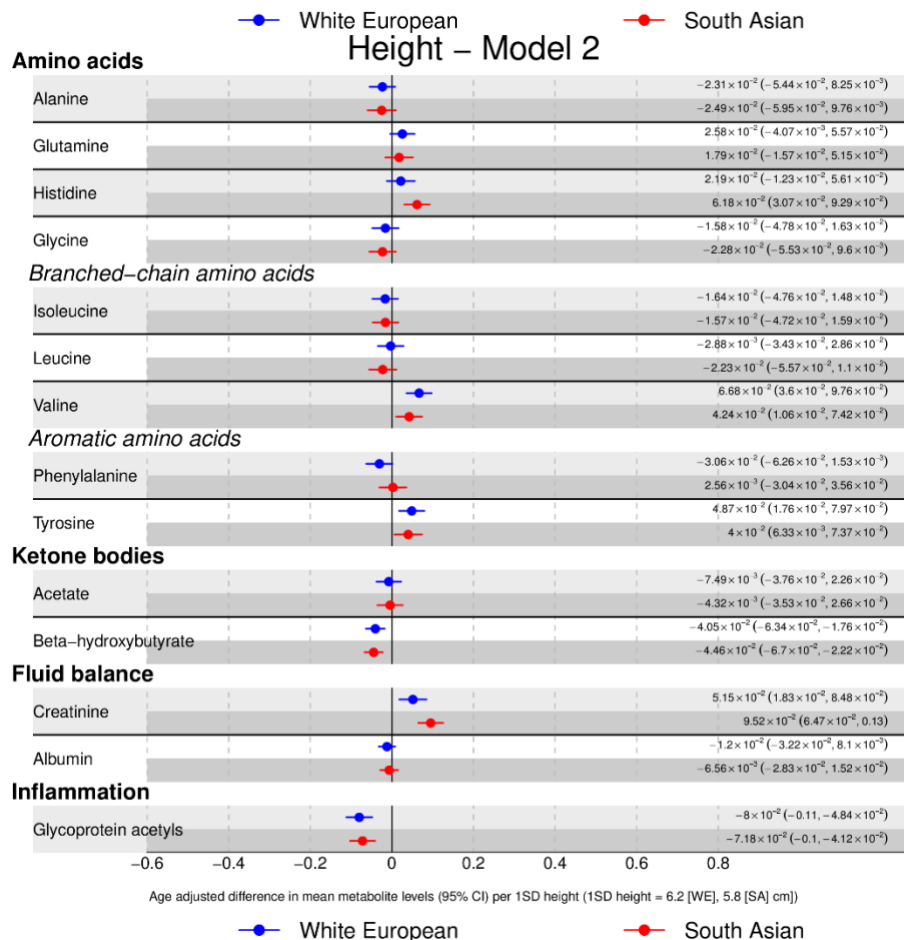

**Figure S7. Associations of maternal height with pregnancy metabolic profiles stratified by ethnicity (model 1 = age-adjusted; model 2 = age-, parity- and education-adjusted).** Data points show SD differences for White European (blue) and South Asian (red) women. Error bars = 95% confidence intervals. Exact point estimates and their corresponding 95% CIs are displayed in text to the right of each point. \* denotes strong statistical evidence from the interaction test (Pinteraction <0.001). Differences in quantified units (mostly mmol/l) are listed in Supplementary File 2. Abbreviations: VLDL, very low-density lipoprotein; LDL, low-density lipoprotein; HDL, high-density lipoprotein; C, cholesterol; MUFA, monounsaturated fatty acids; PUFA, polyunsaturated fatty acids

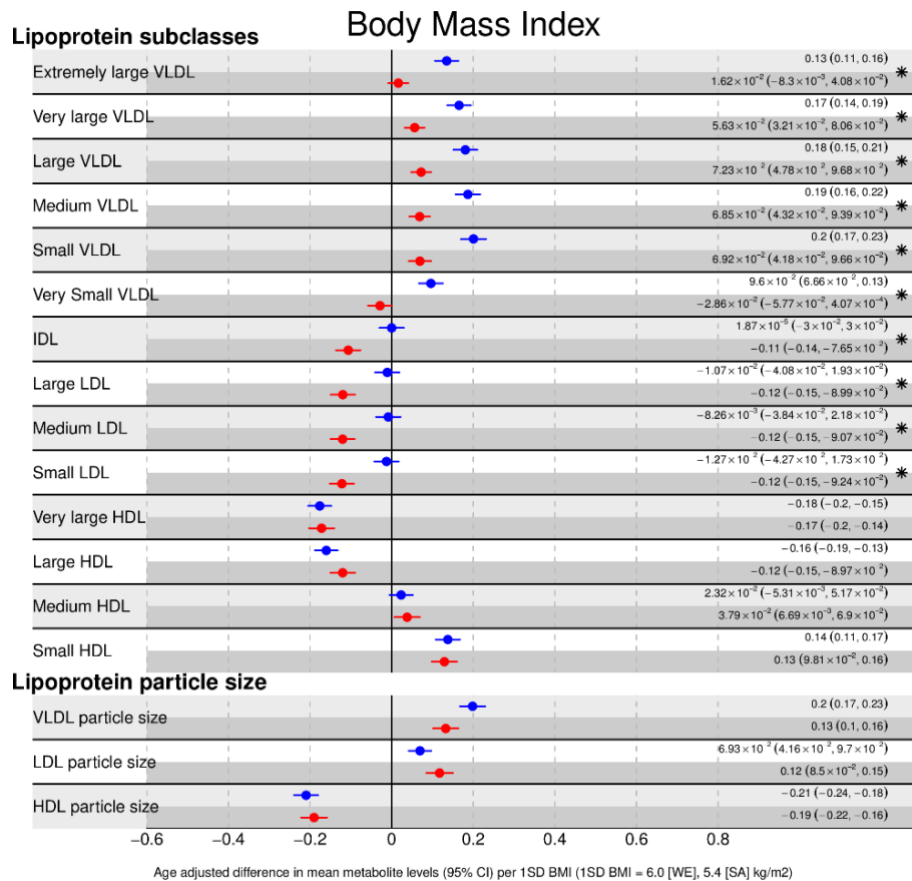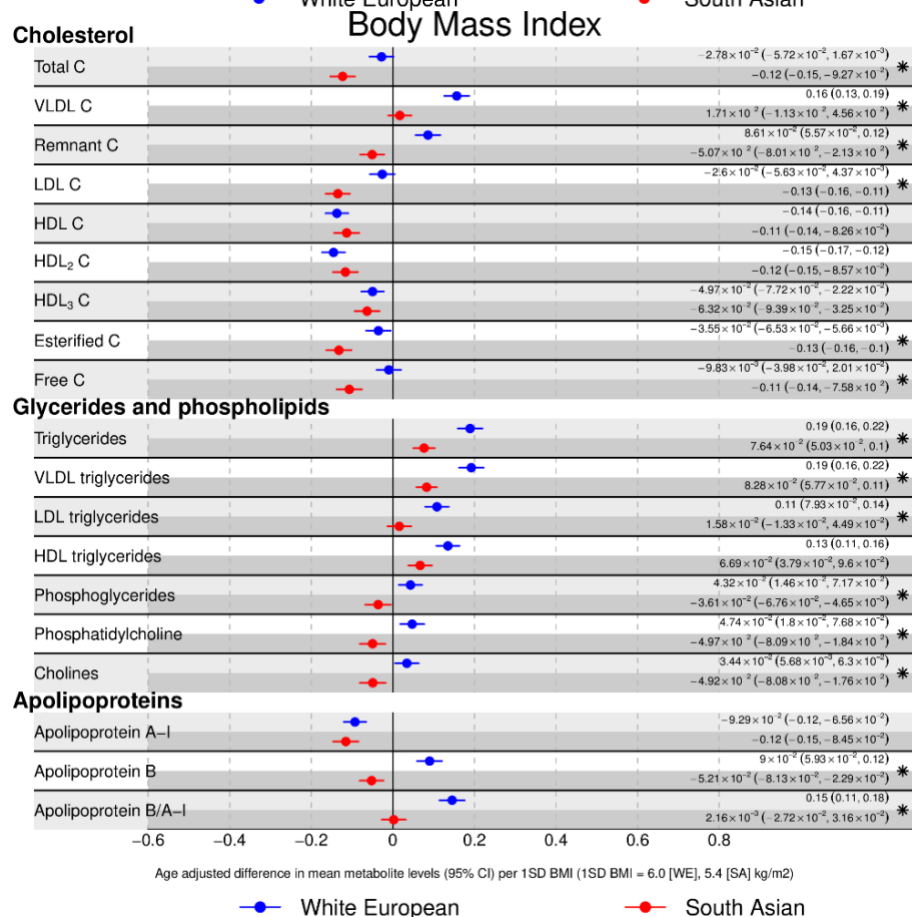

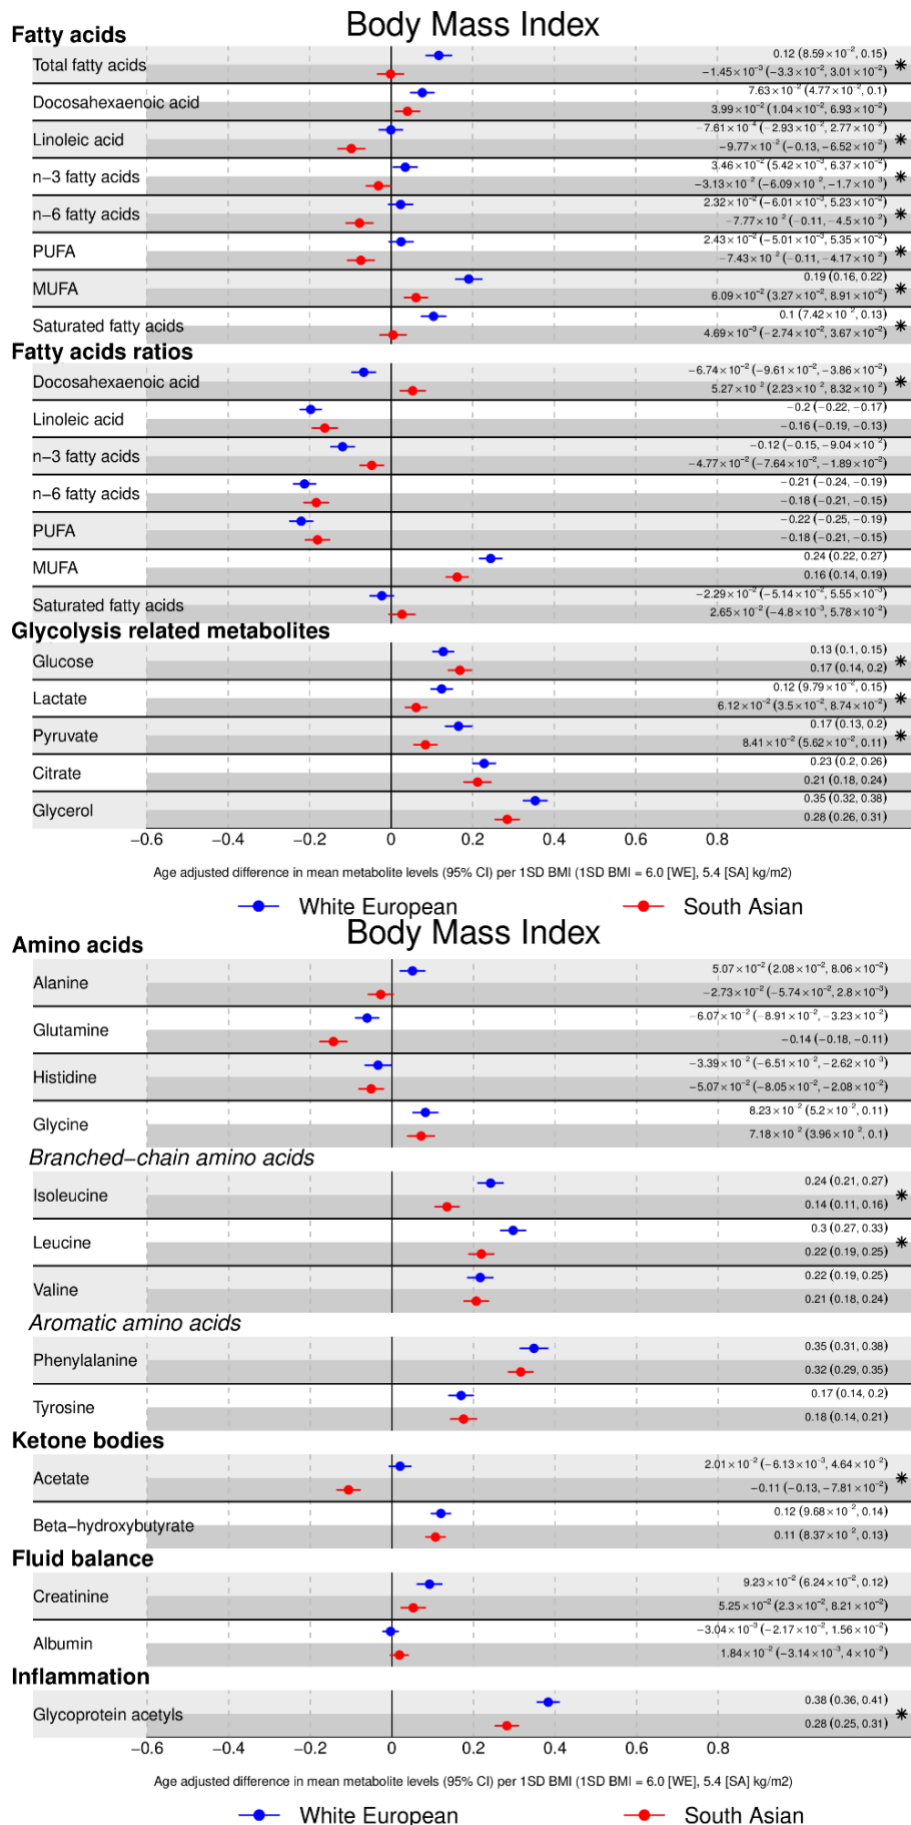

## Lipoprotein subclasses Body Mass Index – Model 2

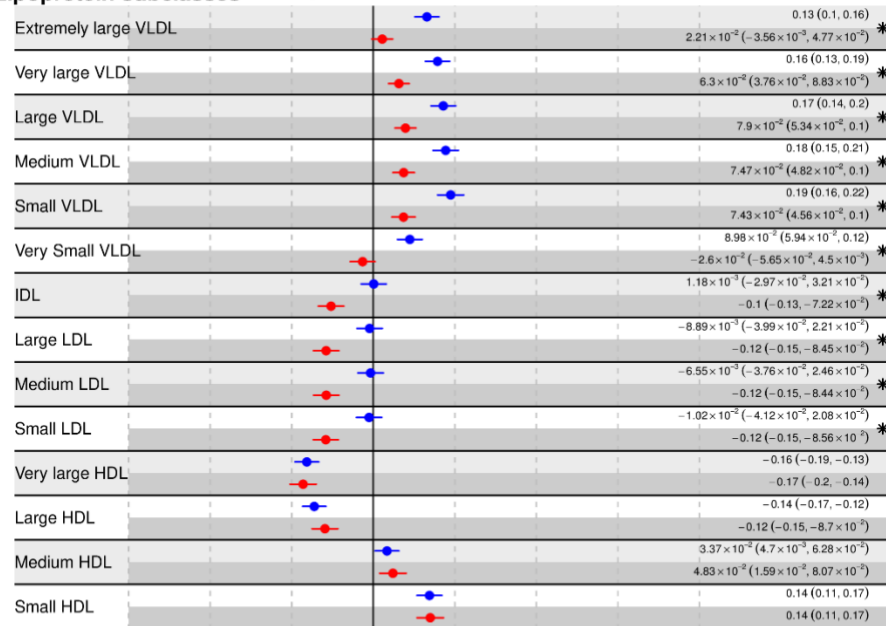

## Lipoprotein particle size

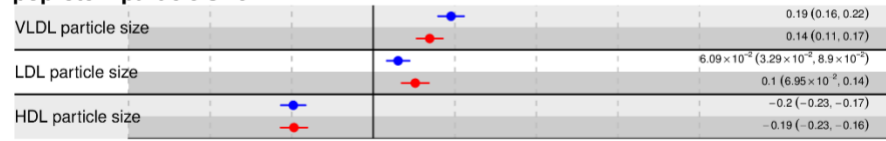

Age adjusted difference in mean metabolite levels (95% CI) per 1SD BMI (1SD BMI = 6.0 [WE], 5.4 [SA] kg/m<sup>2</sup>)

● White European ● South Asian

## Cholesterol Body Mass Index – Model 2

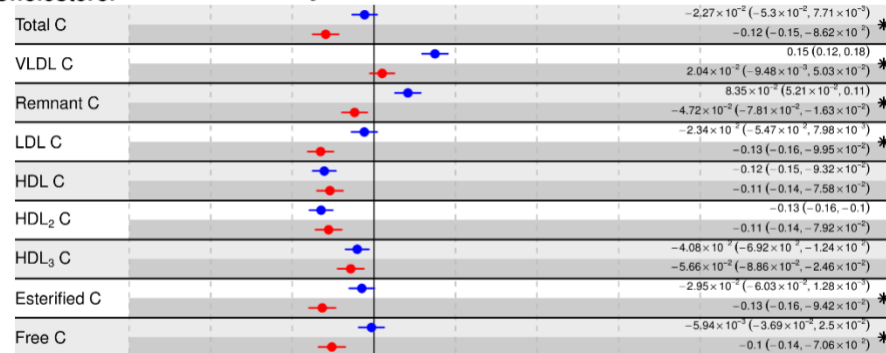

## Glycerides and phospholipids

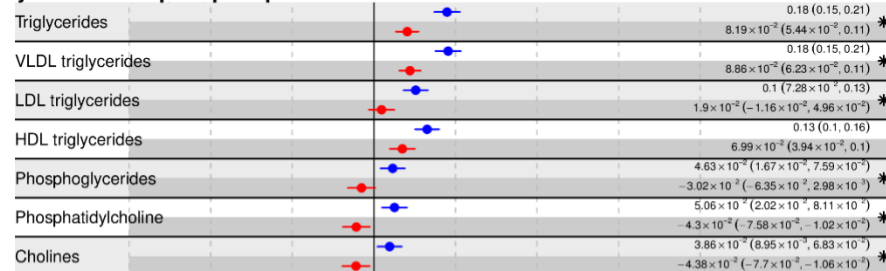

## Apolipoproteins

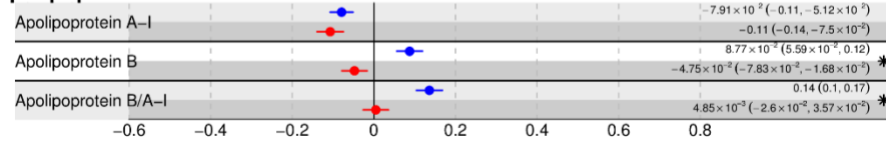

Age adjusted difference in mean metabolite levels (95% CI) per 1SD BMI (1SD BMI = 6.0 [WE], 5.4 [SA] kg/m<sup>2</sup>)

● White European ● South Asian

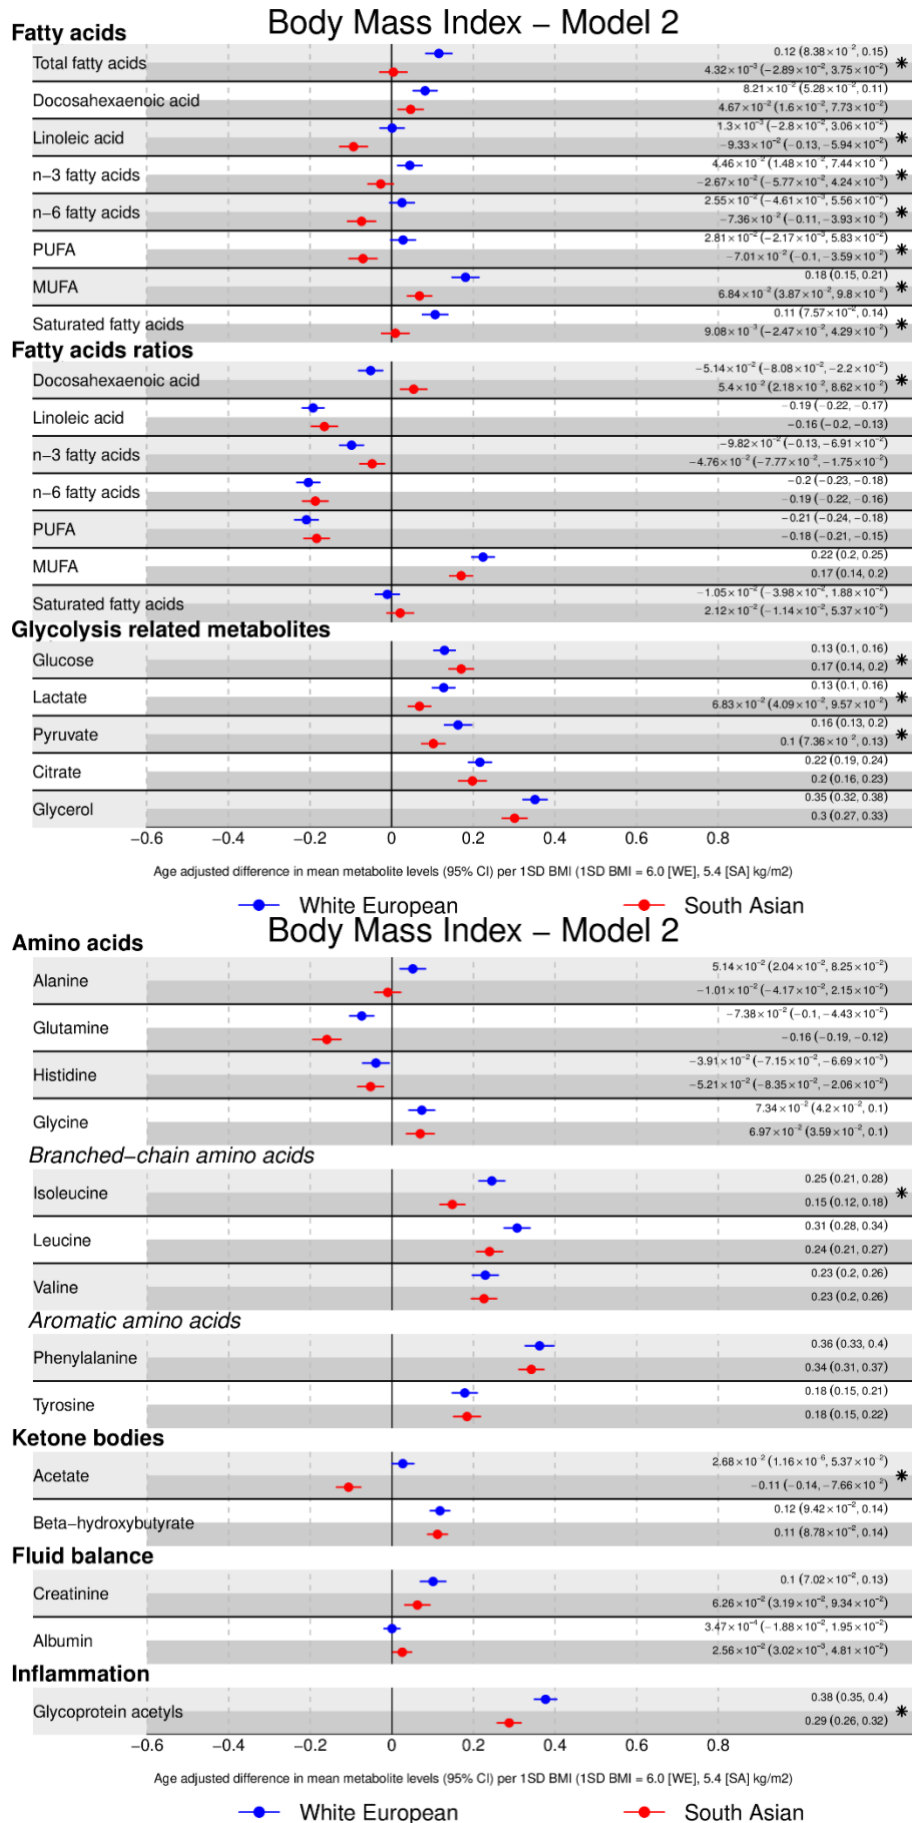

**Figure S8. Associations of maternal body mass index with pregnancy metabolic profiles stratified by ethnicity (model 1 = age-adjusted; model 2 = age-, parity- and education-adjusted).** Data points show SD differences for White European (blue) and South Asian (red) women. Error bars = 95% confidence intervals. Exact point estimates and their corresponding 95% CIs are displayed in text to the right of each point. \* denotes strong statistical evidence from the interaction test (Pinteraction <0.001). Differences in quantified units (mostly mmol/l) are listed in Supplementary File 2. Abbreviations: VLDL, very low-density lipoprotein; LDL, low-density lipoprotein; HDL, high-density lipoprotein; C, cholesterol; MUFA, monounsaturated fatty acids; PUFA, polyunsaturated fatty acids



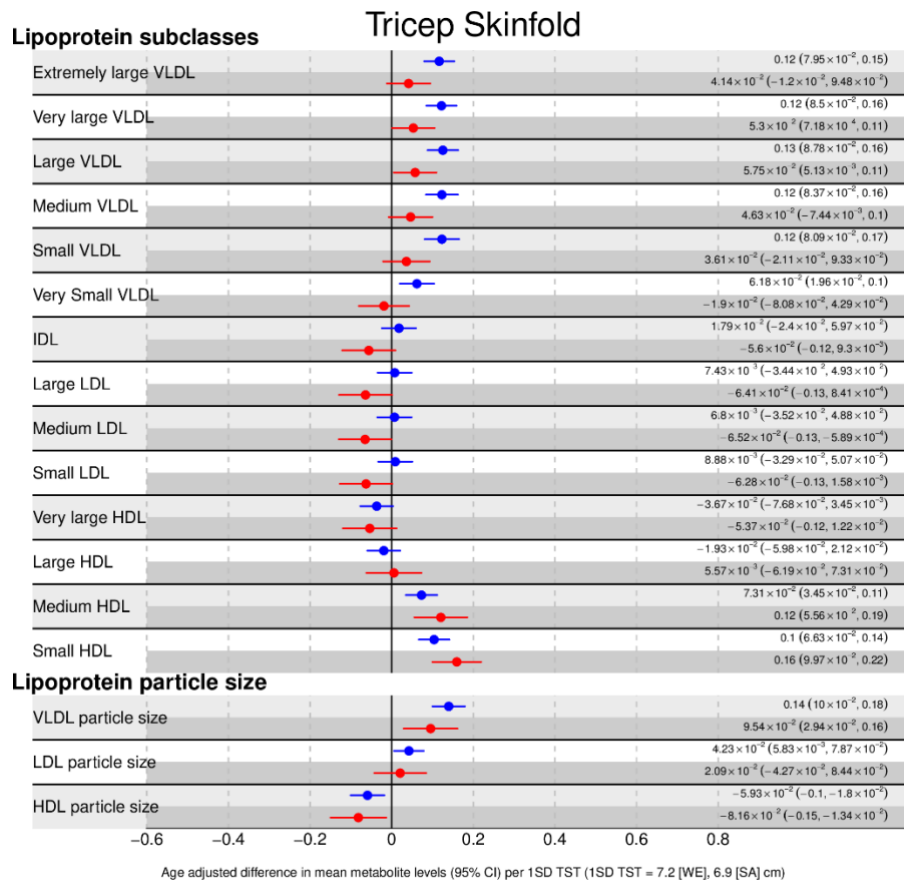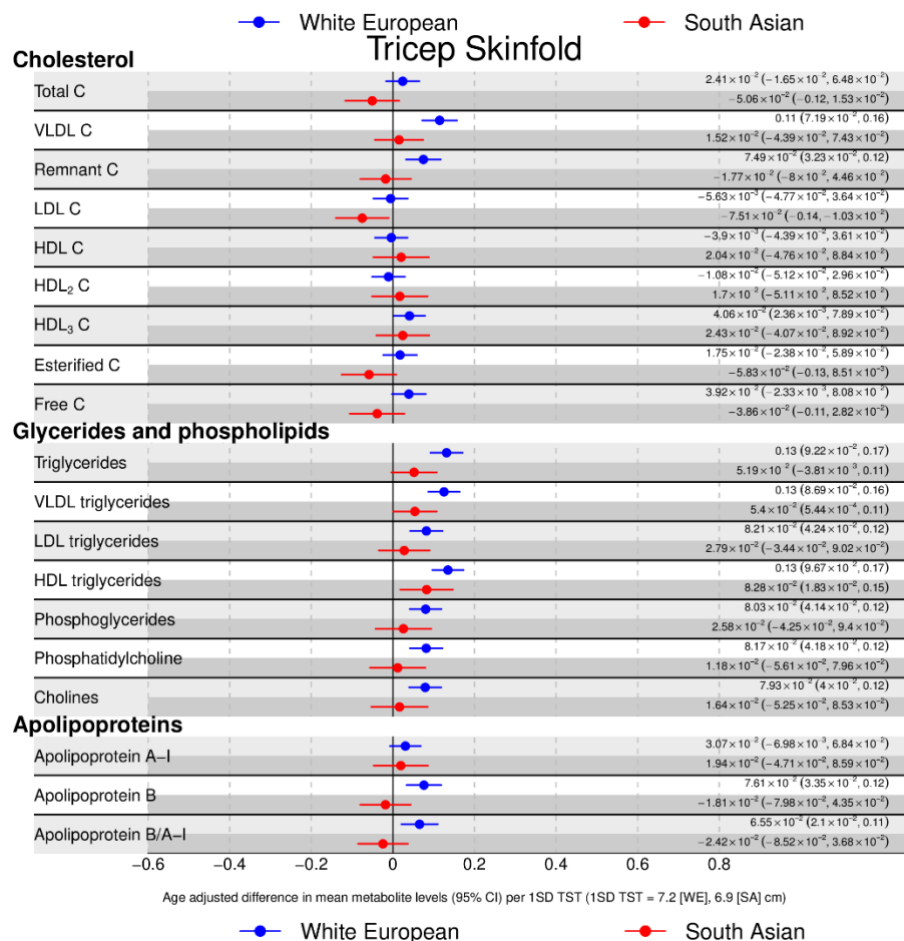

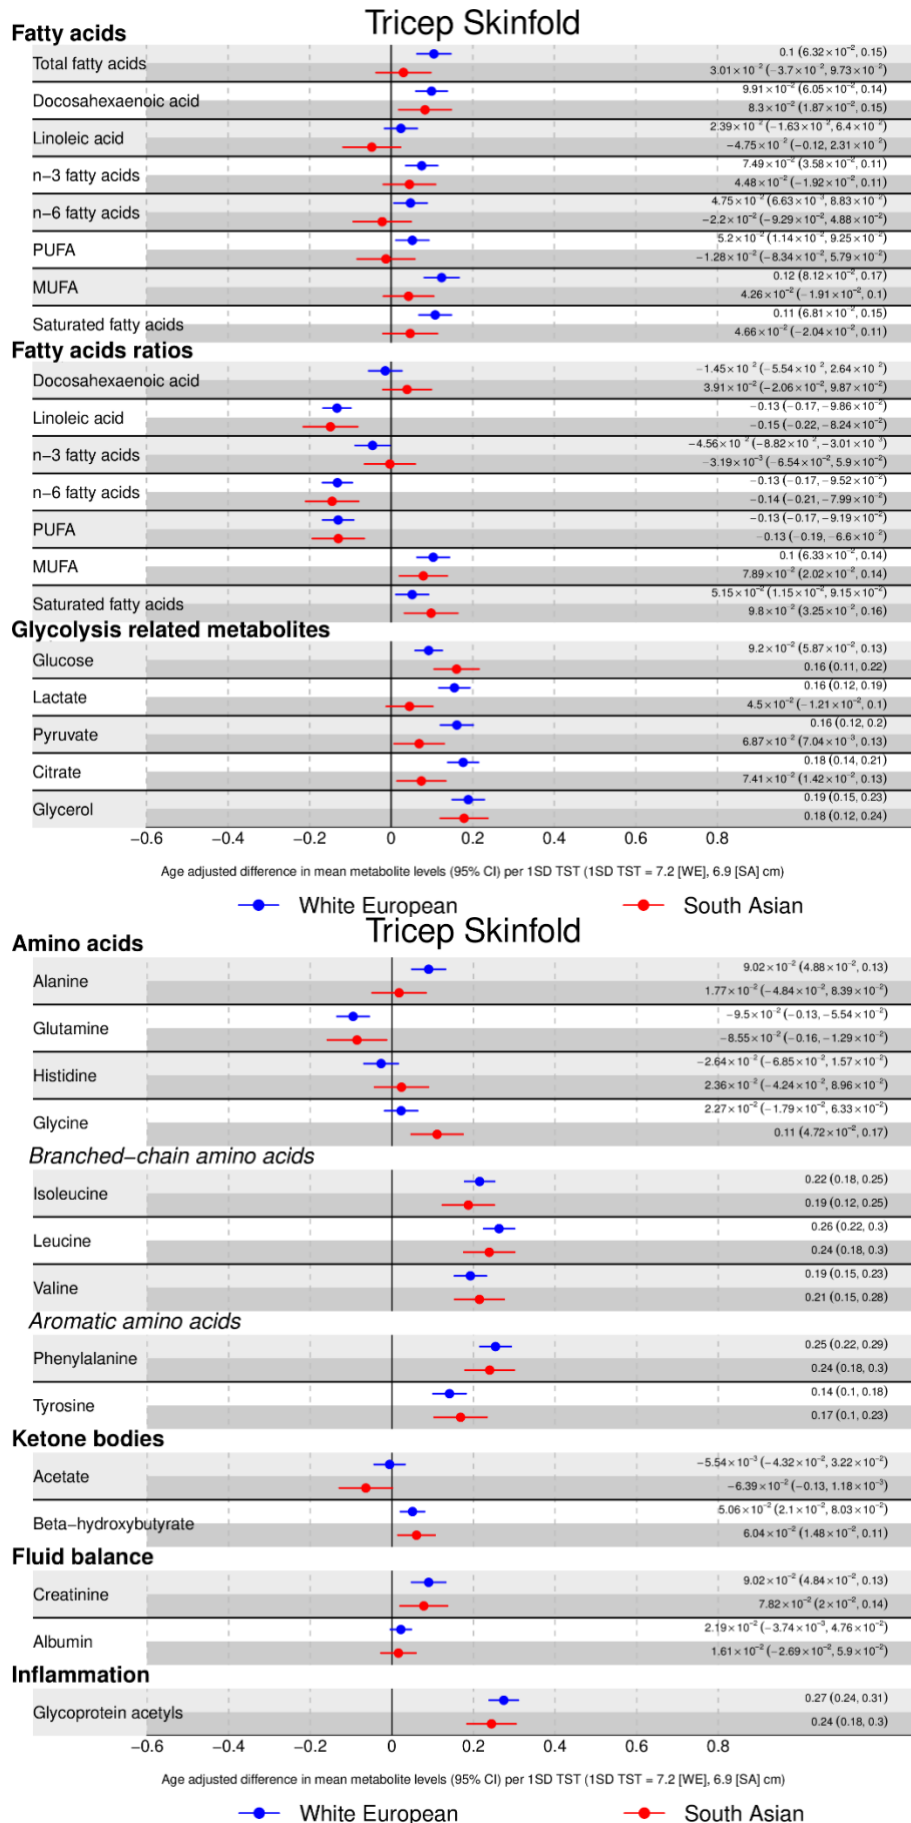

## Lipoprotein subclasses Tricep Skinfold – Model 2

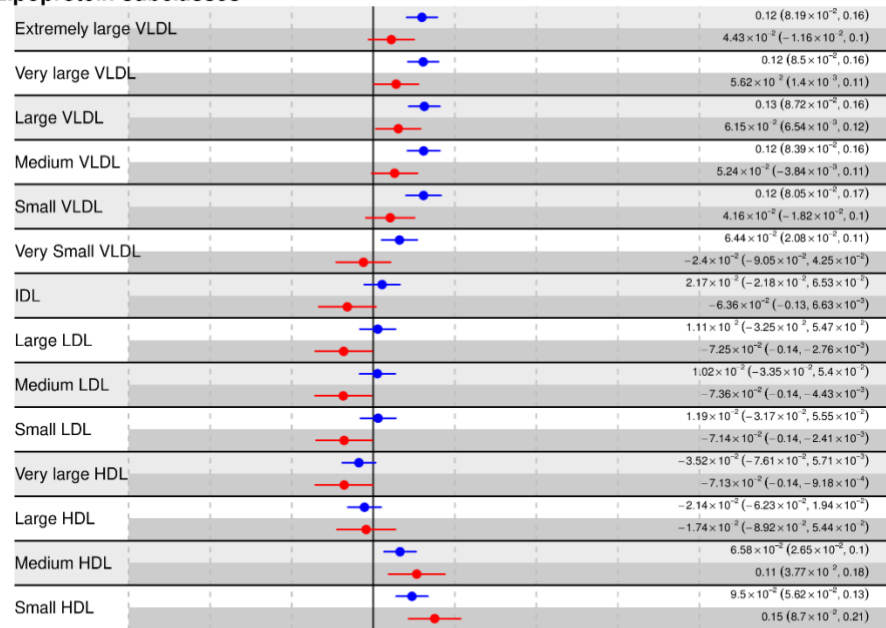

## Lipoprotein particle size

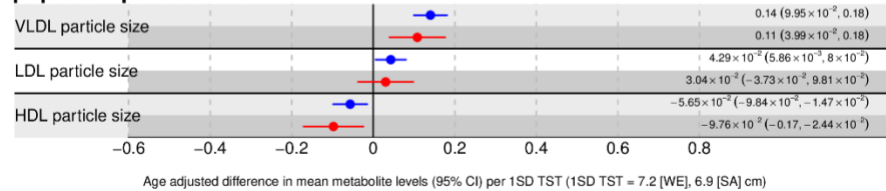

Age adjusted difference in mean metabolite levels (95% CI) per 1SD TST (1SD TST = 7.2 [WE], 6.9 [SA] cm)

● White European ● South Asian

## Cholesterol

## Tricep Skinfold – Model 2

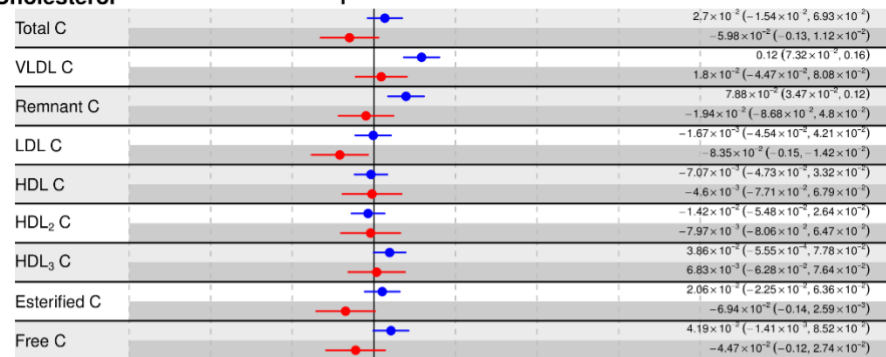

## Glycerides and phospholipids

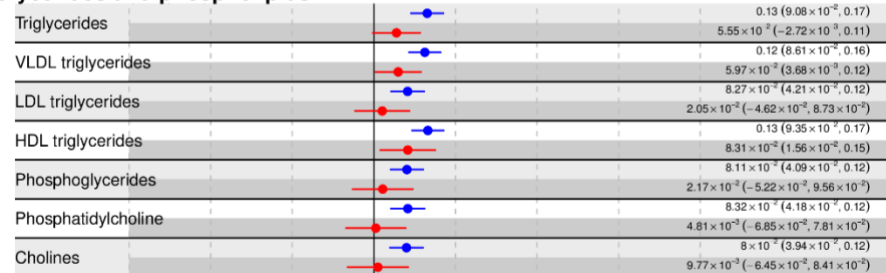

## Apolipoproteins

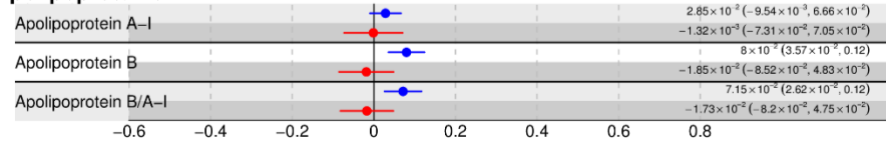

Age adjusted difference in mean metabolite levels (95% CI) per 1SD TST (1SD TST = 7.2 [WE], 6.9 [SA] cm)

● White European ● South Asian

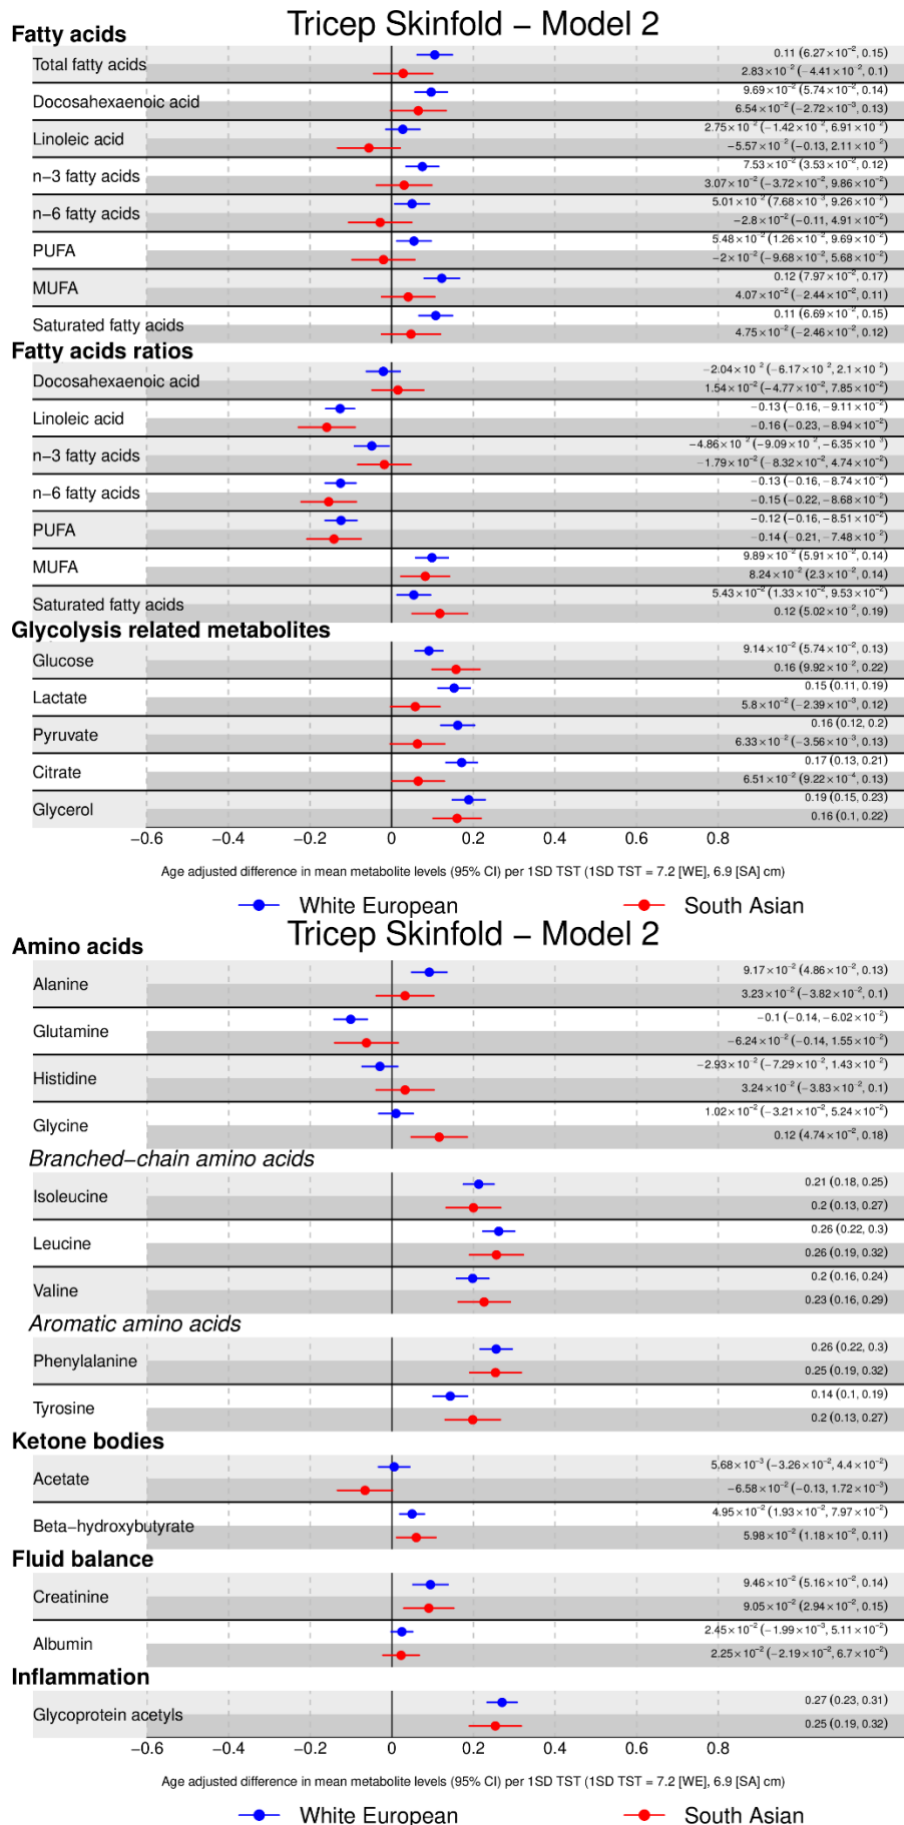

**Figure S9. Associations of tricep skinfold thickness with pregnancy metabolic profiles stratified by ethnicity (model 1 = age-adjusted; model 2 = age-, parity- and education-adjusted).** Data points show SD differences for White European (blue) and South Asian (red) women. Error bars = 95% confidence intervals. Exact point estimates and their corresponding 95% CIs are displayed in text to the right of each point. \* denotes strong statistical evidence from the interaction test (Pinteraction <0.001). Differences in quantified units (mostly mmol/l) are listed in Supplementary File 2. Abbreviations: VLDL, very low-density lipoprotein; LDL, low-density lipoprotein; HDL, high-density lipoprotein; C, cholesterol; MUFA, monounsaturated fatty acids; PUFA, polyunsaturated fatty acids

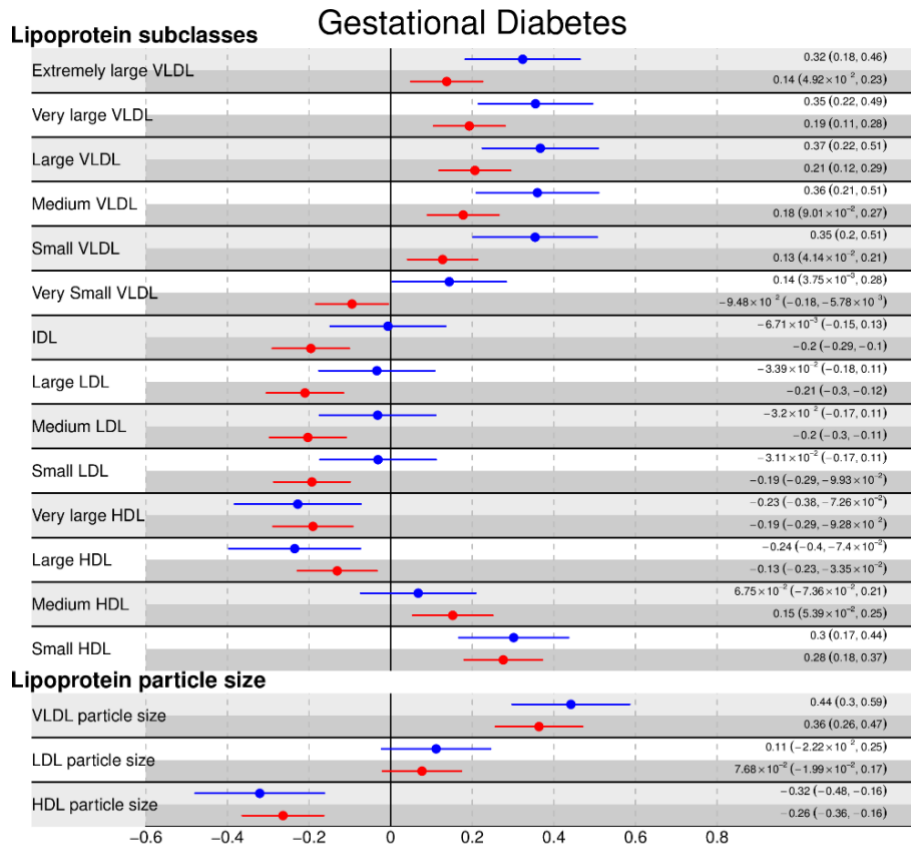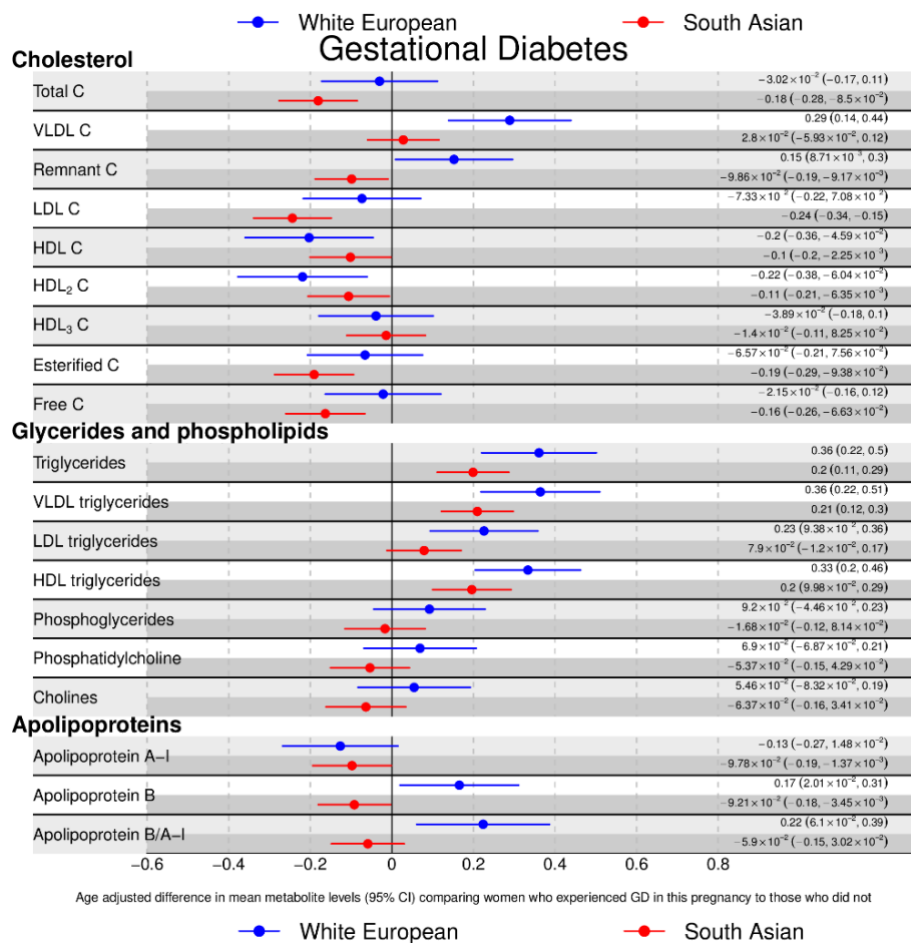

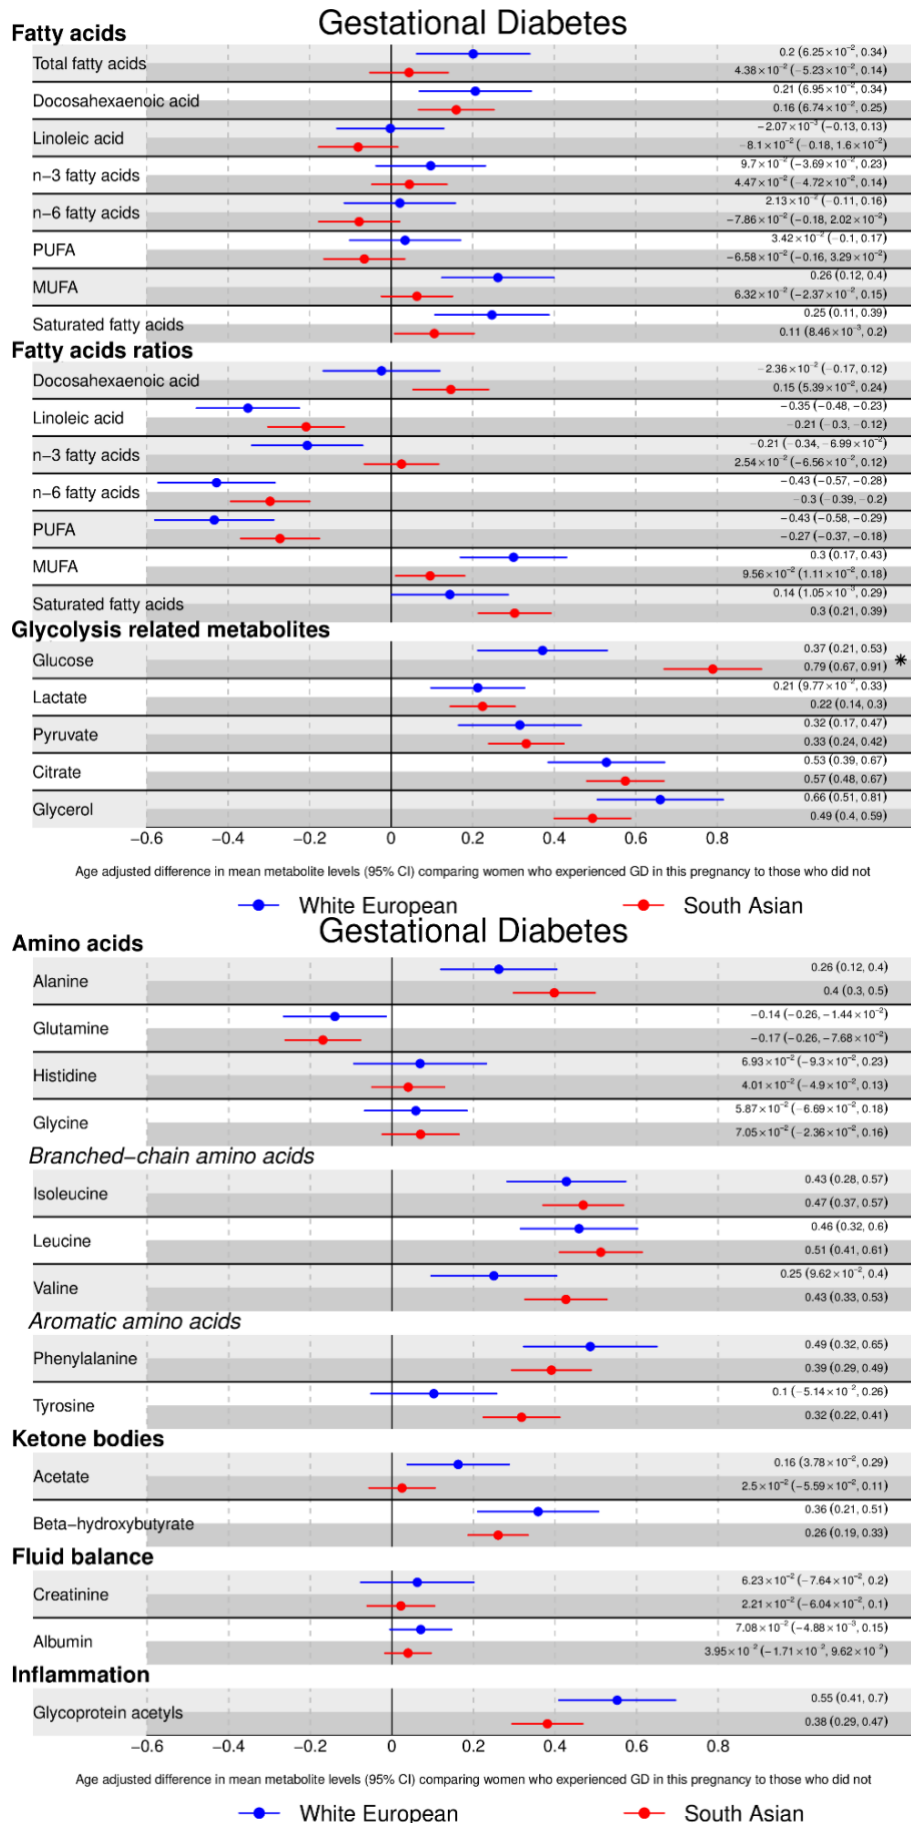

## Lipoprotein subclasses

### Gestational Diabetes – Model 2

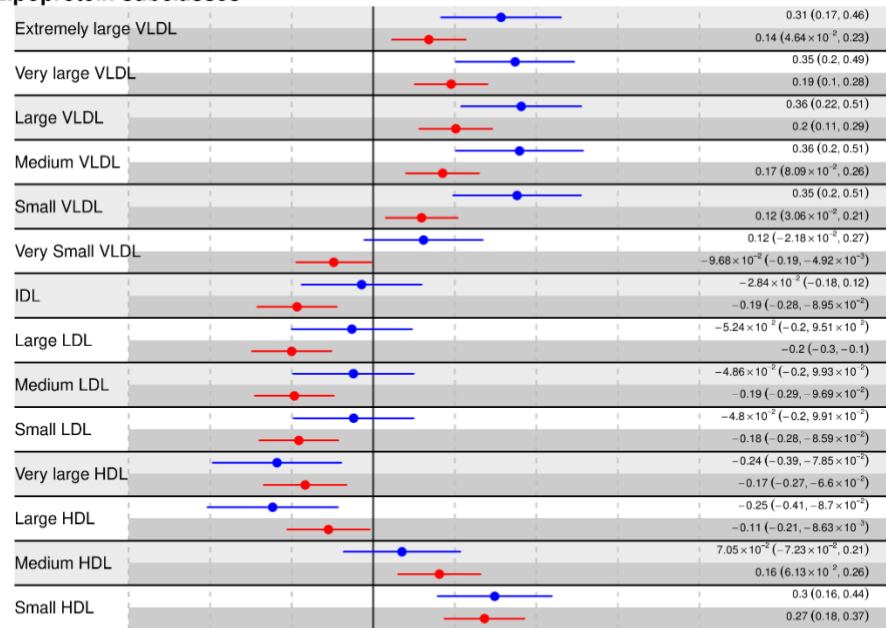

## Lipoprotein particle size

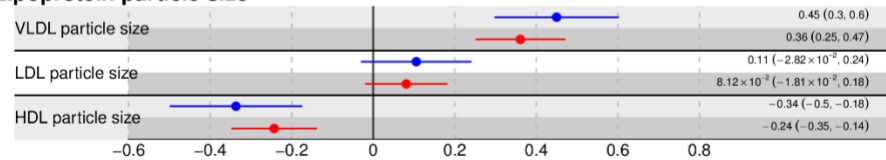

Age adjusted difference in mean metabolite levels (95% CI) comparing women who experienced GD in this pregnancy to those who did not

● White European ● South Asian

## Cholesterol

### Gestational Diabetes – Model 2

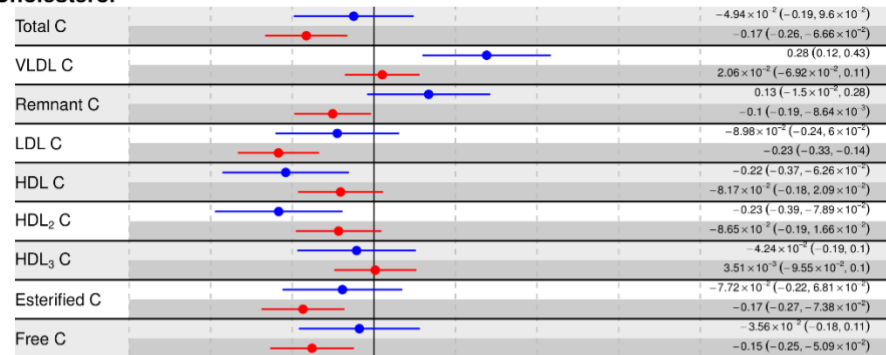

## Glycerides and phospholipids

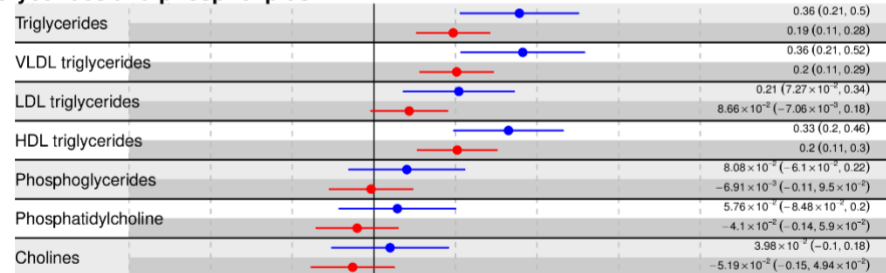

## Apolipoproteins

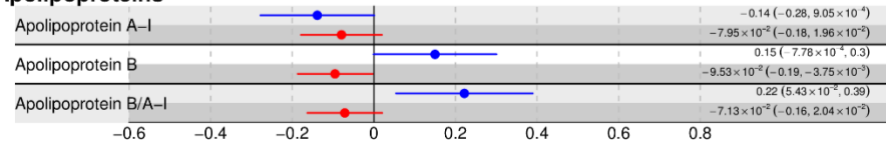

Age adjusted difference in mean metabolite levels (95% CI) comparing women who experienced GD in this pregnancy to those who did not

● White European ● South Asian



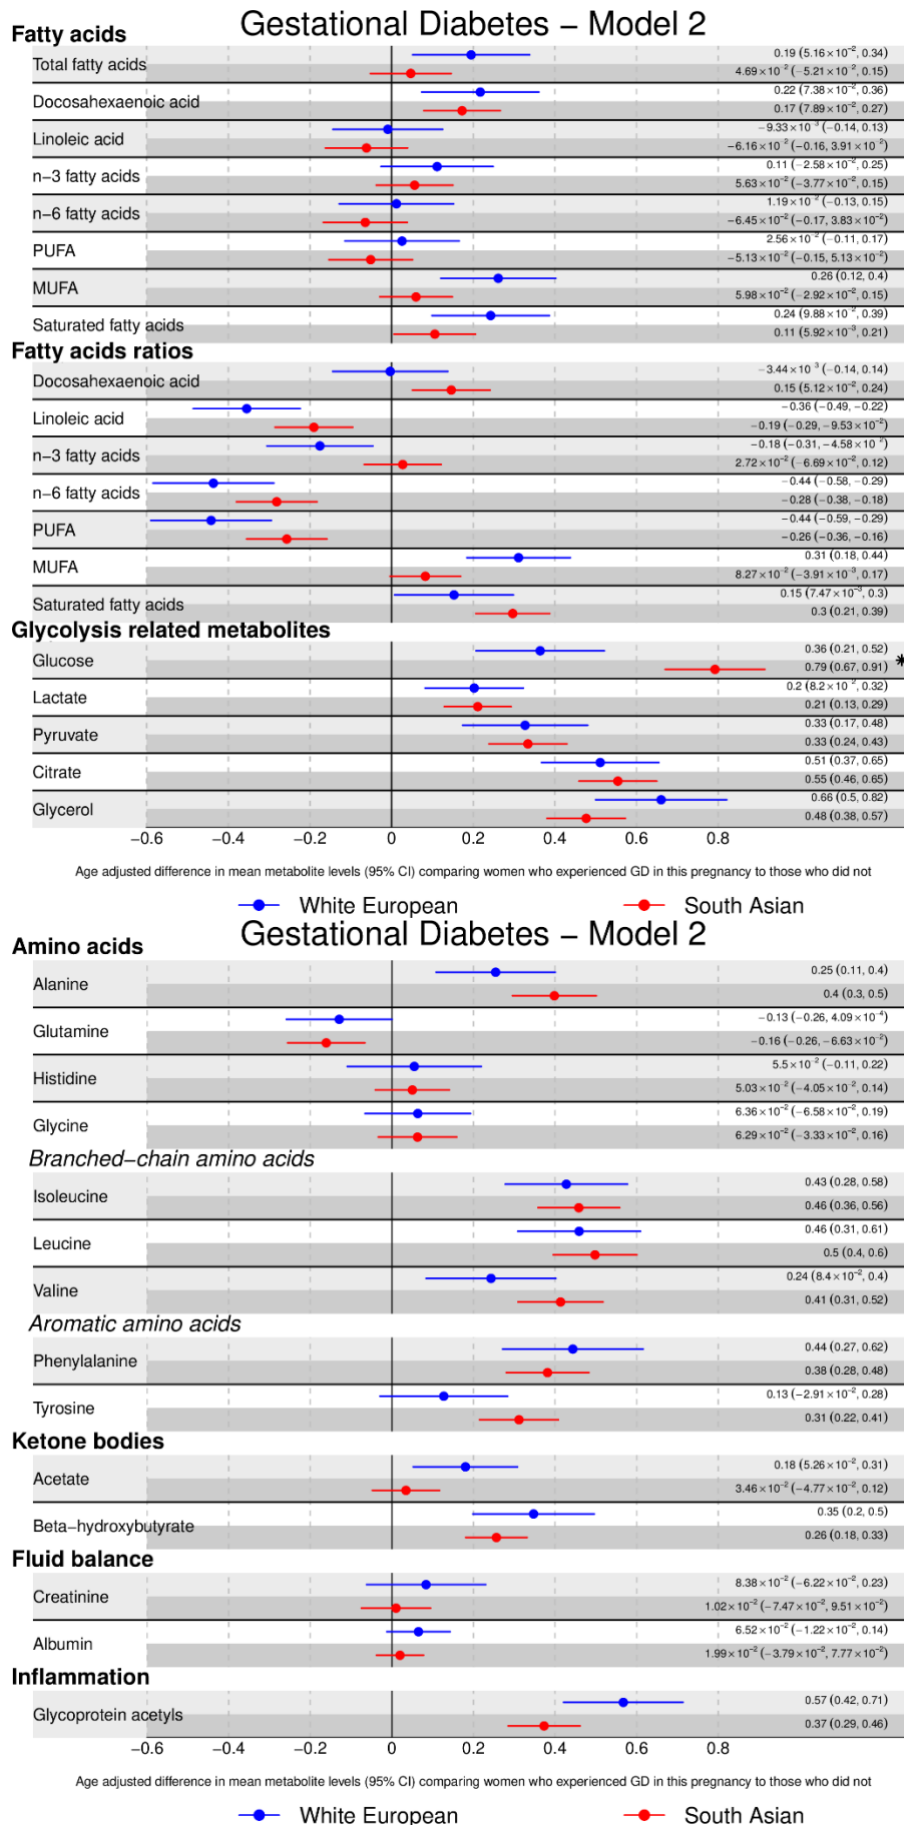

## Lipoprotein subclasses

### Gestational Diabetes – Model 3

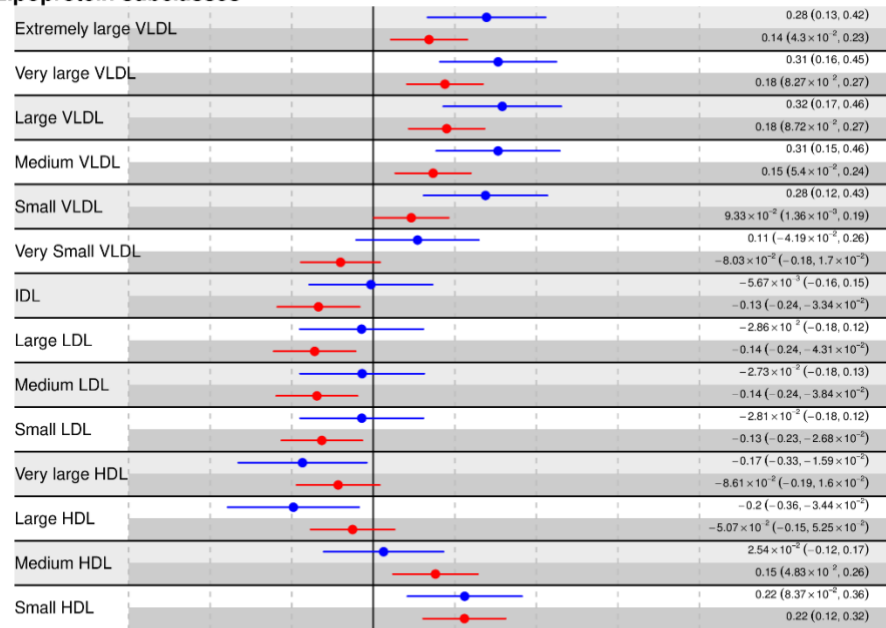

## Lipoprotein particle size

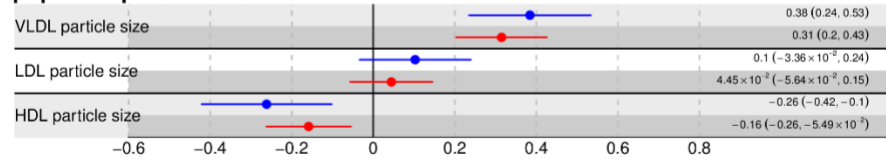

Age adjusted difference in mean metabolite levels (95% CI) comparing women who experienced GD in this pregnancy to those who did not

● White European ● South Asian

## Cholesterol

### Gestational Diabetes – Model 3

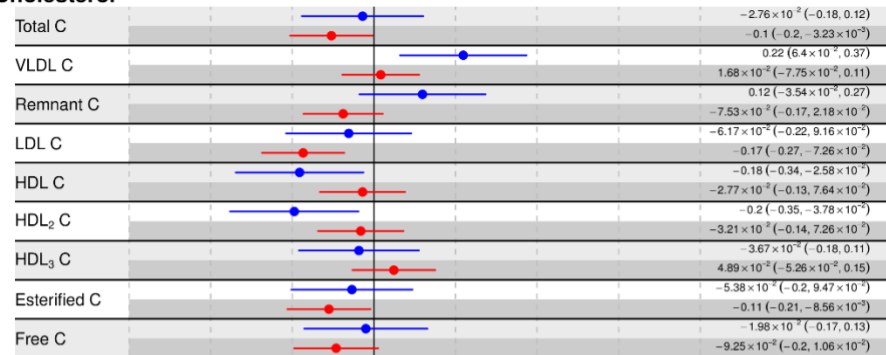

## Glycerides and phospholipids

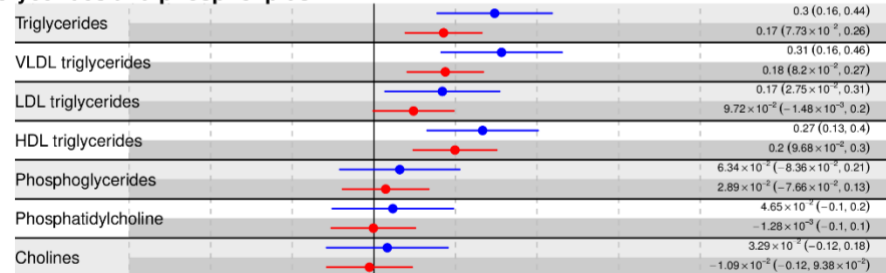

## Apolipoproteins

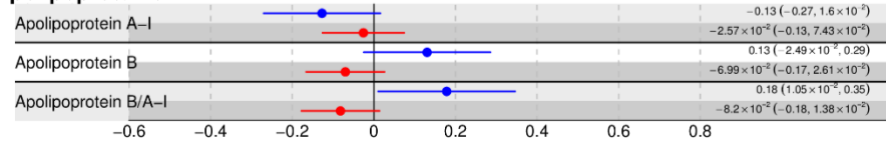

Age adjusted difference in mean metabolite levels (95% CI) comparing women who experienced GD in this pregnancy to those who did not

● White European ● South Asian

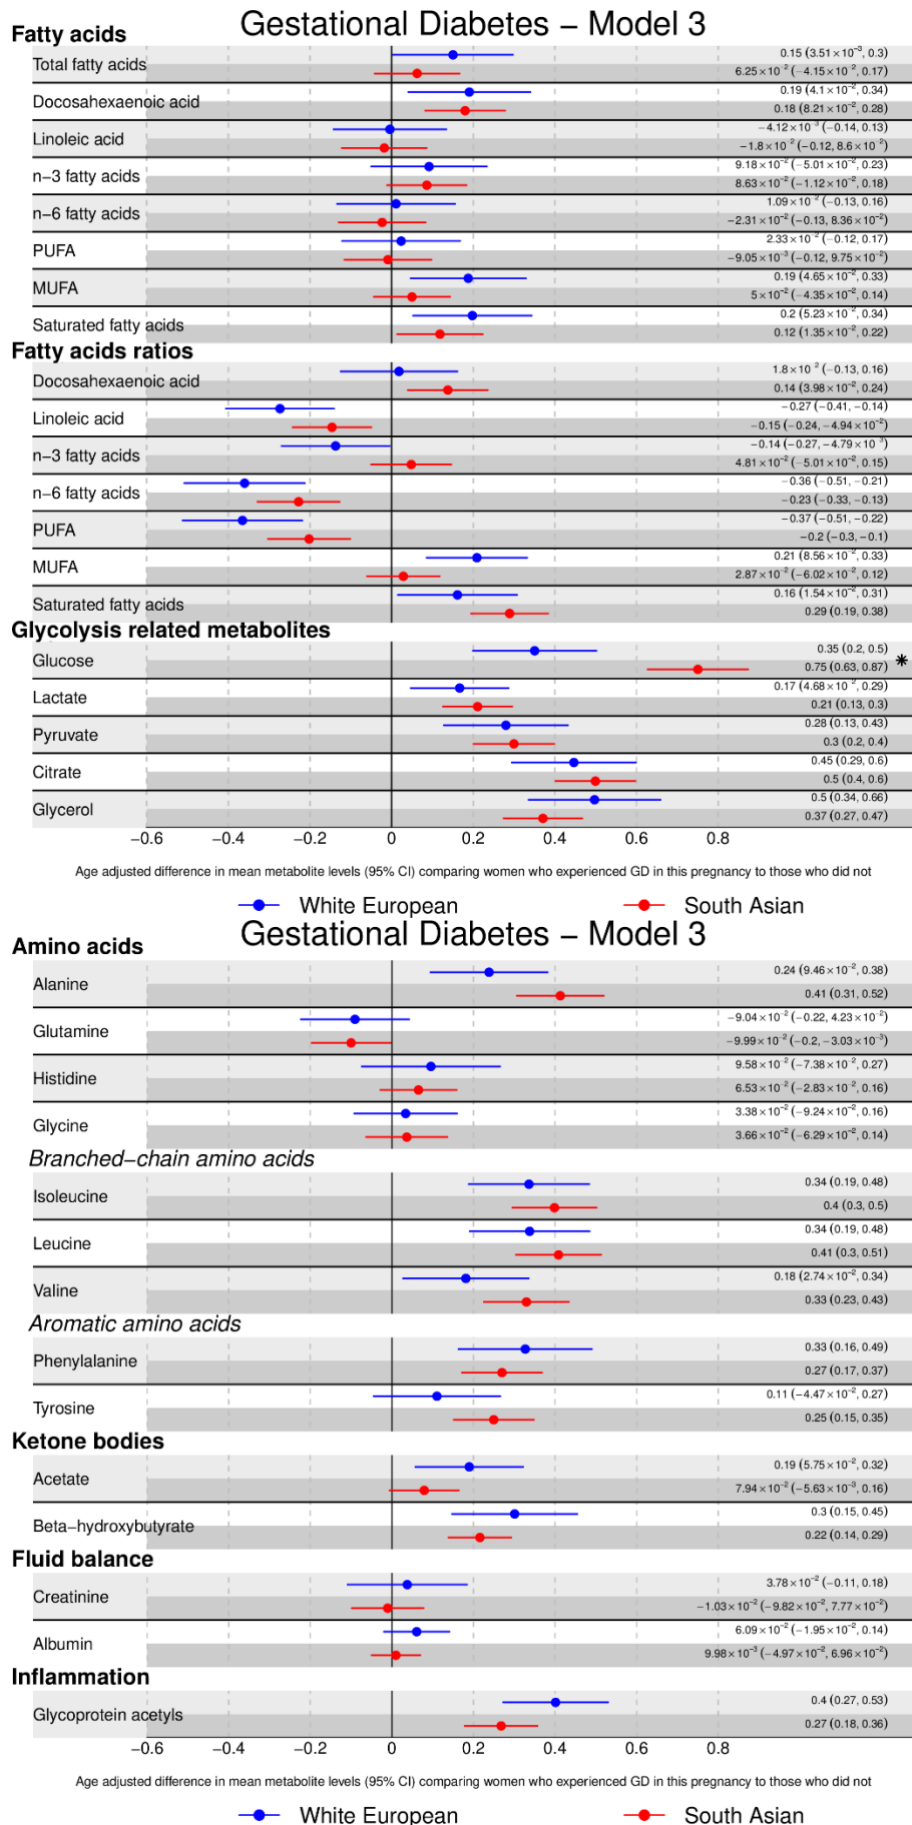

**Figure S10. Associations of maternal gestational diabetes with pregnancy metabolic profiles stratified by ethnicity (model 1 = age-adjusted; model 2 = age-, parity- and education-adjusted, model 3 = age-, parity-, education- and BMI-adjusted).** Data points show SD differences for White European (blue) and South Asian (red) women. Error bars = 95% confidence intervals. Exact point estimates and their corresponding 95% CIs are displayed in text to the right of each point. \* denotes strong statistical evidence from the interaction test ( $P_{\text{interaction}} < 0.001$ ). Differences in quantified units (mostly mmol/l) are listed in Supplementary File 2. Abbreviations: VLDL, very low-density lipoprotein; LDL, low-density lipoprotein; HDL, high-density lipoprotein; C, cholesterol; MUFA, monounsaturated fatty acids; PUFA, polyunsaturated fatty acids

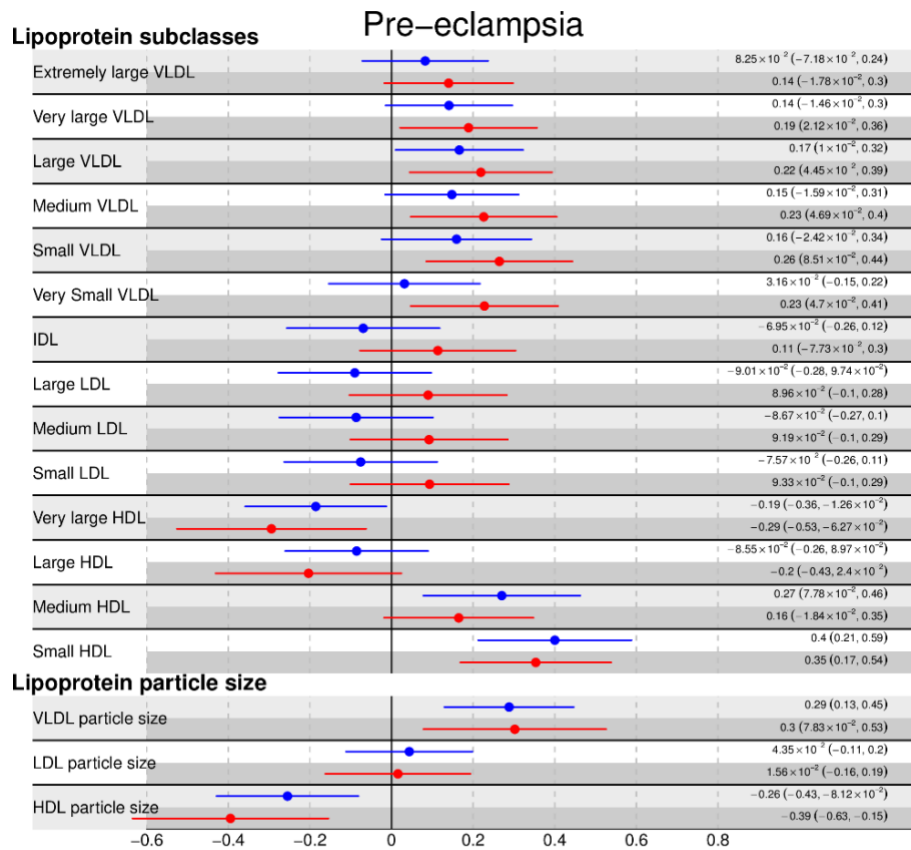

Age adjusted difference in mean metabolite levels (95% CI) comparing women who experienced PE in this pregnancy to those who had no evidence of any HDP

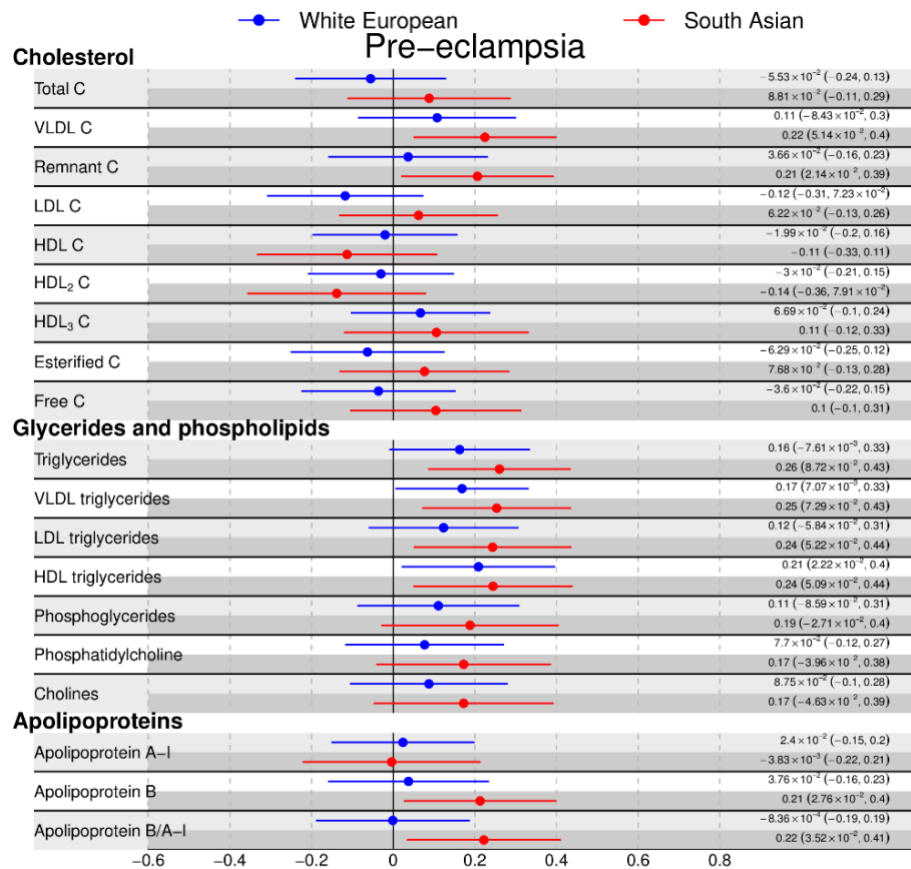

Age adjusted difference in mean metabolite levels (95% CI) comparing women who experienced PE in this pregnancy to those who had no evidence of any HDP

● White European      ● South Asian

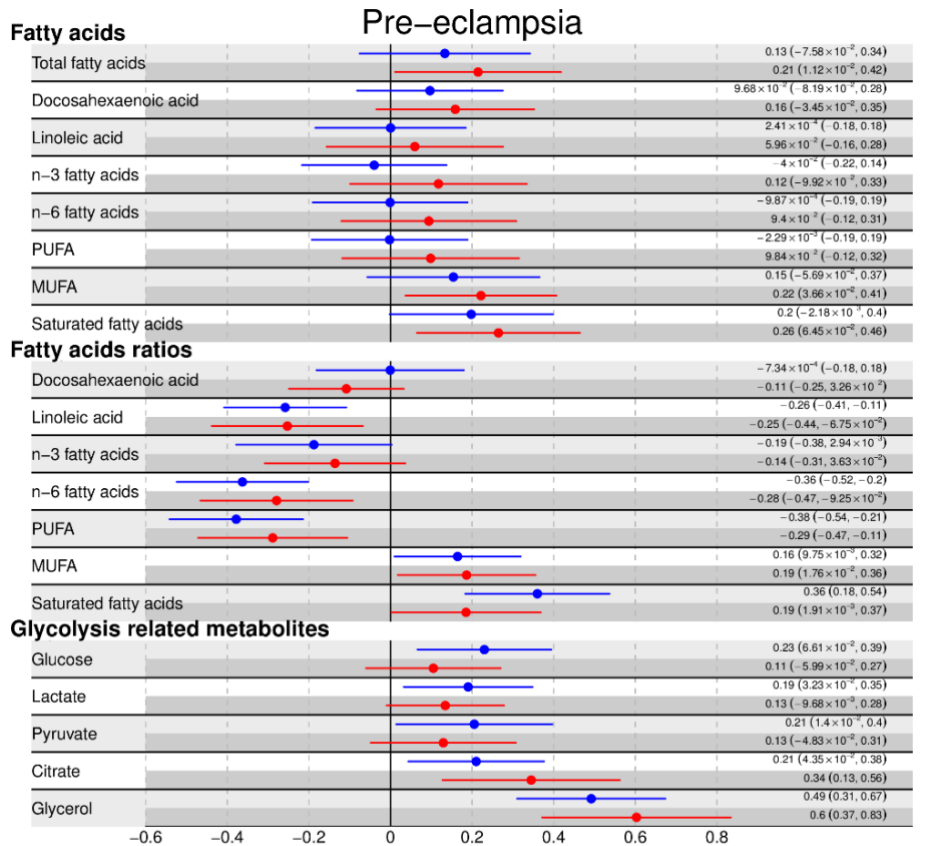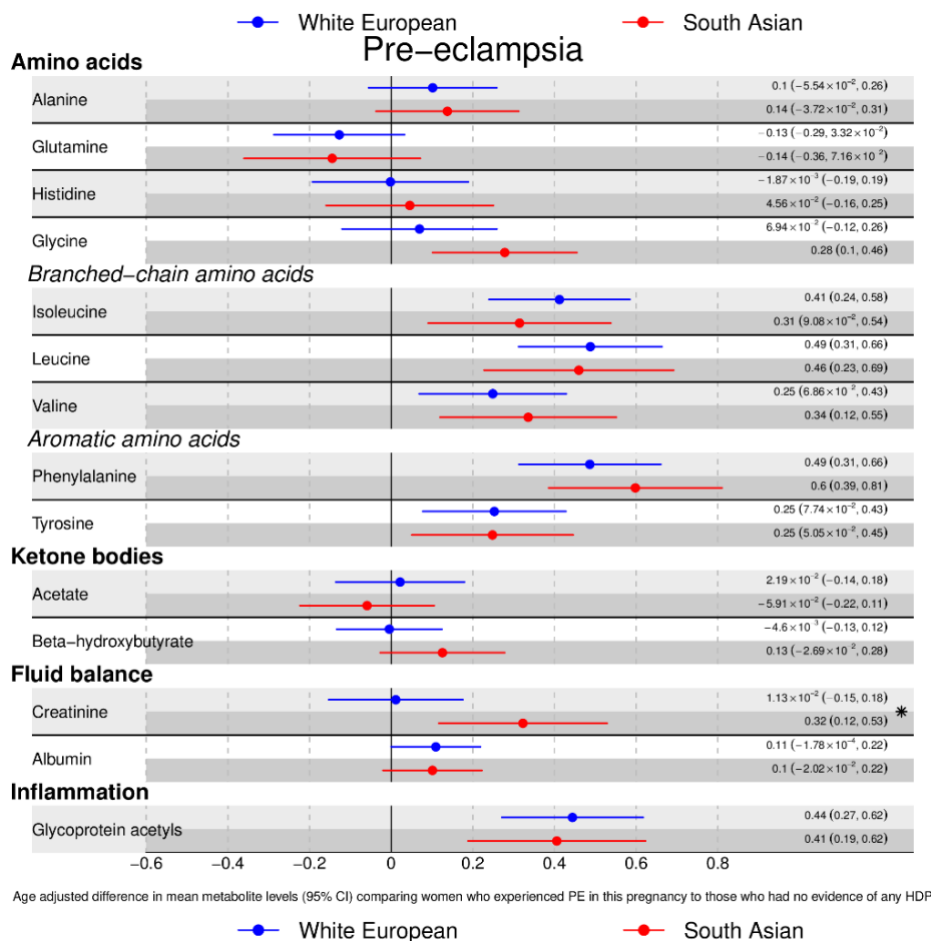

## Lipoprotein subclasses Pre-eclampsia – Model 2

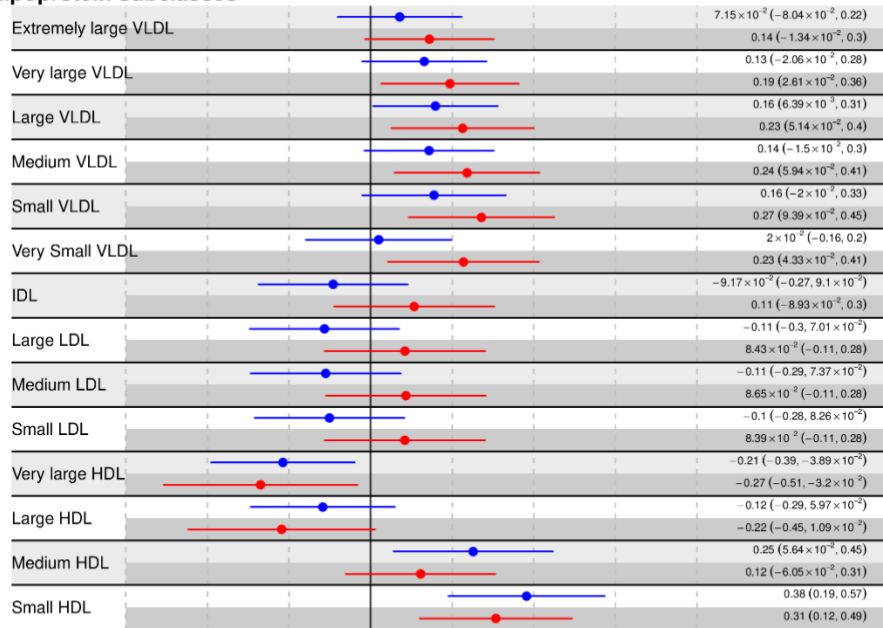

## Lipoprotein particle size

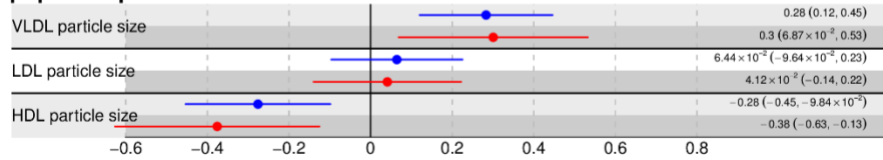

Age adjusted difference in mean metabolite levels (95% CI) comparing women who experienced PE in this pregnancy to those who had no evidence of any HDP

● White European ● South Asian

## Cholesterol Pre-eclampsia – Model 2

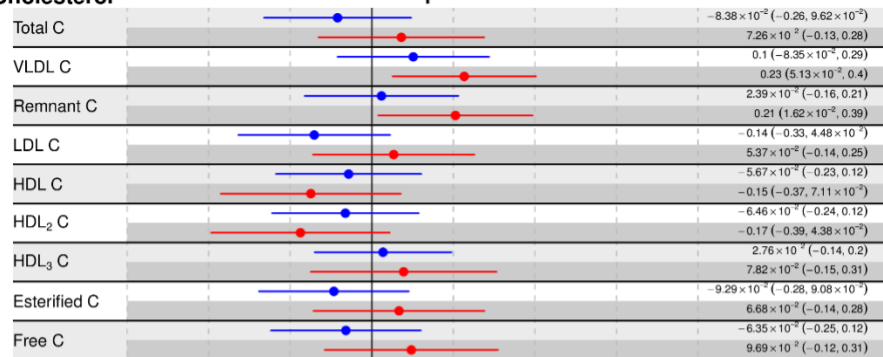

## Glycerides and phospholipids

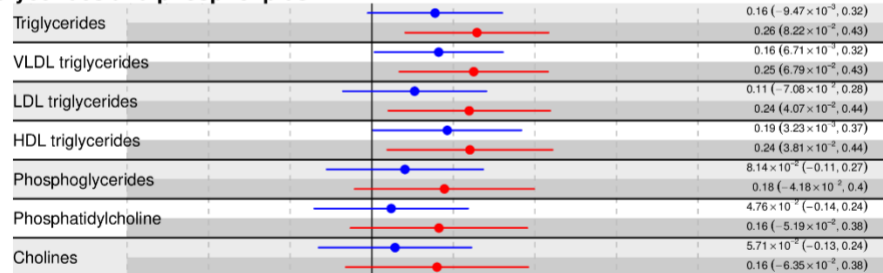

## Apolipoproteins

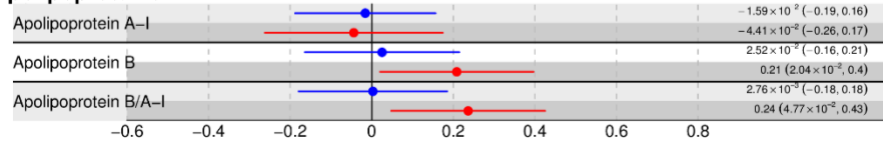

Age adjusted difference in mean metabolite levels (95% CI) comparing women who experienced PE in this pregnancy to those who had no evidence of any HDP

● White European ● South Asian

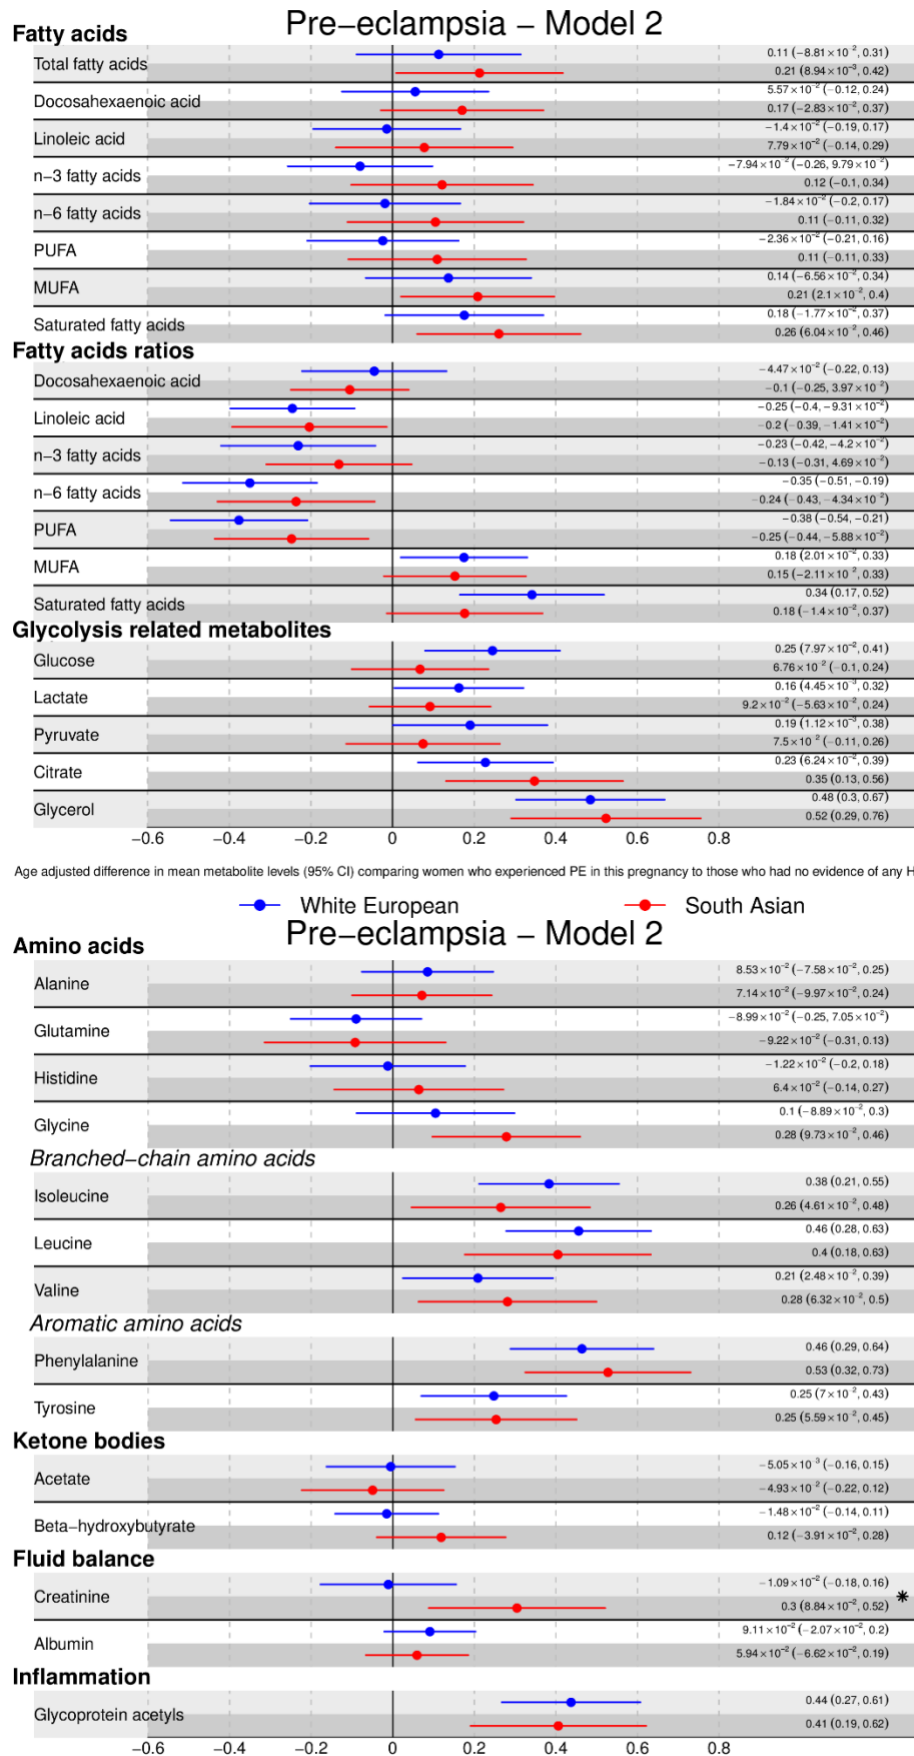



## Lipoprotein subclasses

## Pre-eclampsia – Model 3

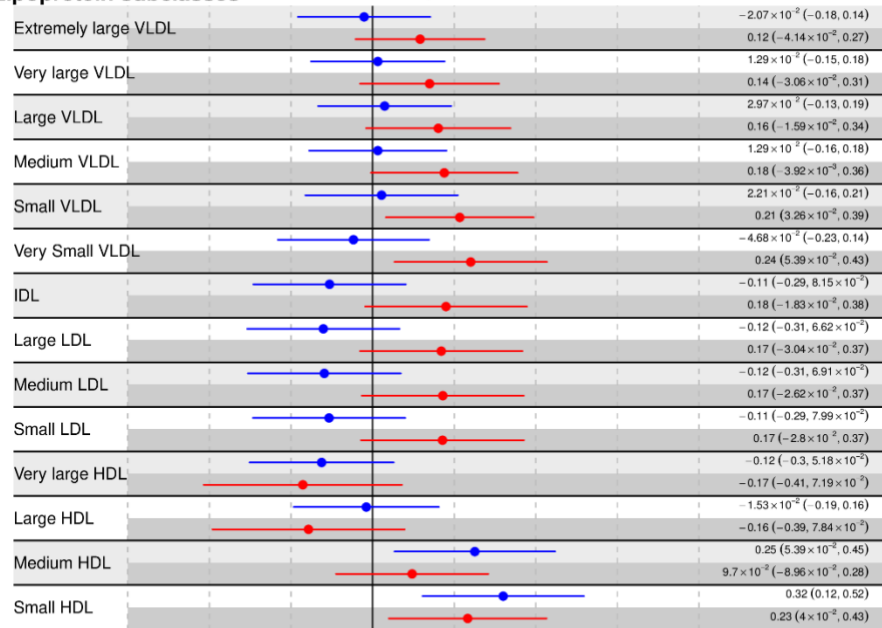

## Lipoprotein particle size

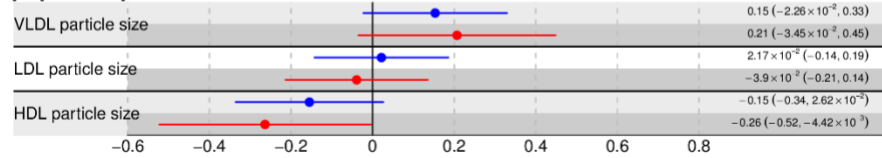

Age adjusted difference in mean metabolite levels (95% CI) comparing women who experienced PE in this pregnancy to those who had no evidence of any HDP

● White European ● South Asian

## Cholesterol

## Pre-eclampsia – Model 3

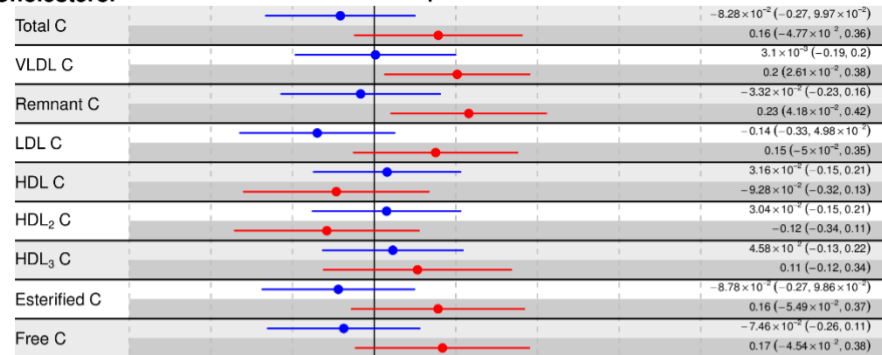

## Glycerides and phospholipids

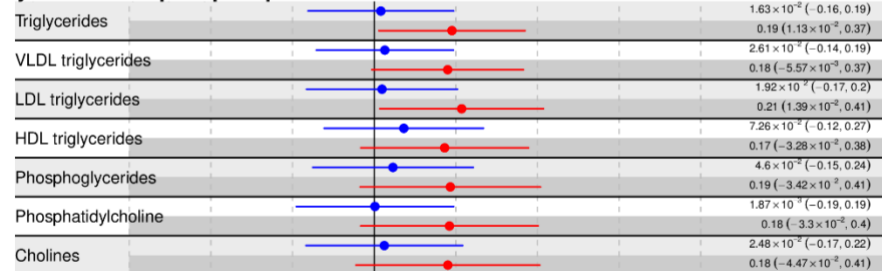

## Apolipoproteins

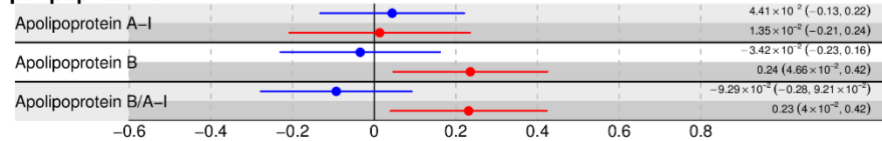

Age adjusted difference in mean metabolite levels (95% CI) comparing women who experienced PE in this pregnancy to those who had no evidence of any HDP

● White European ● South Asian

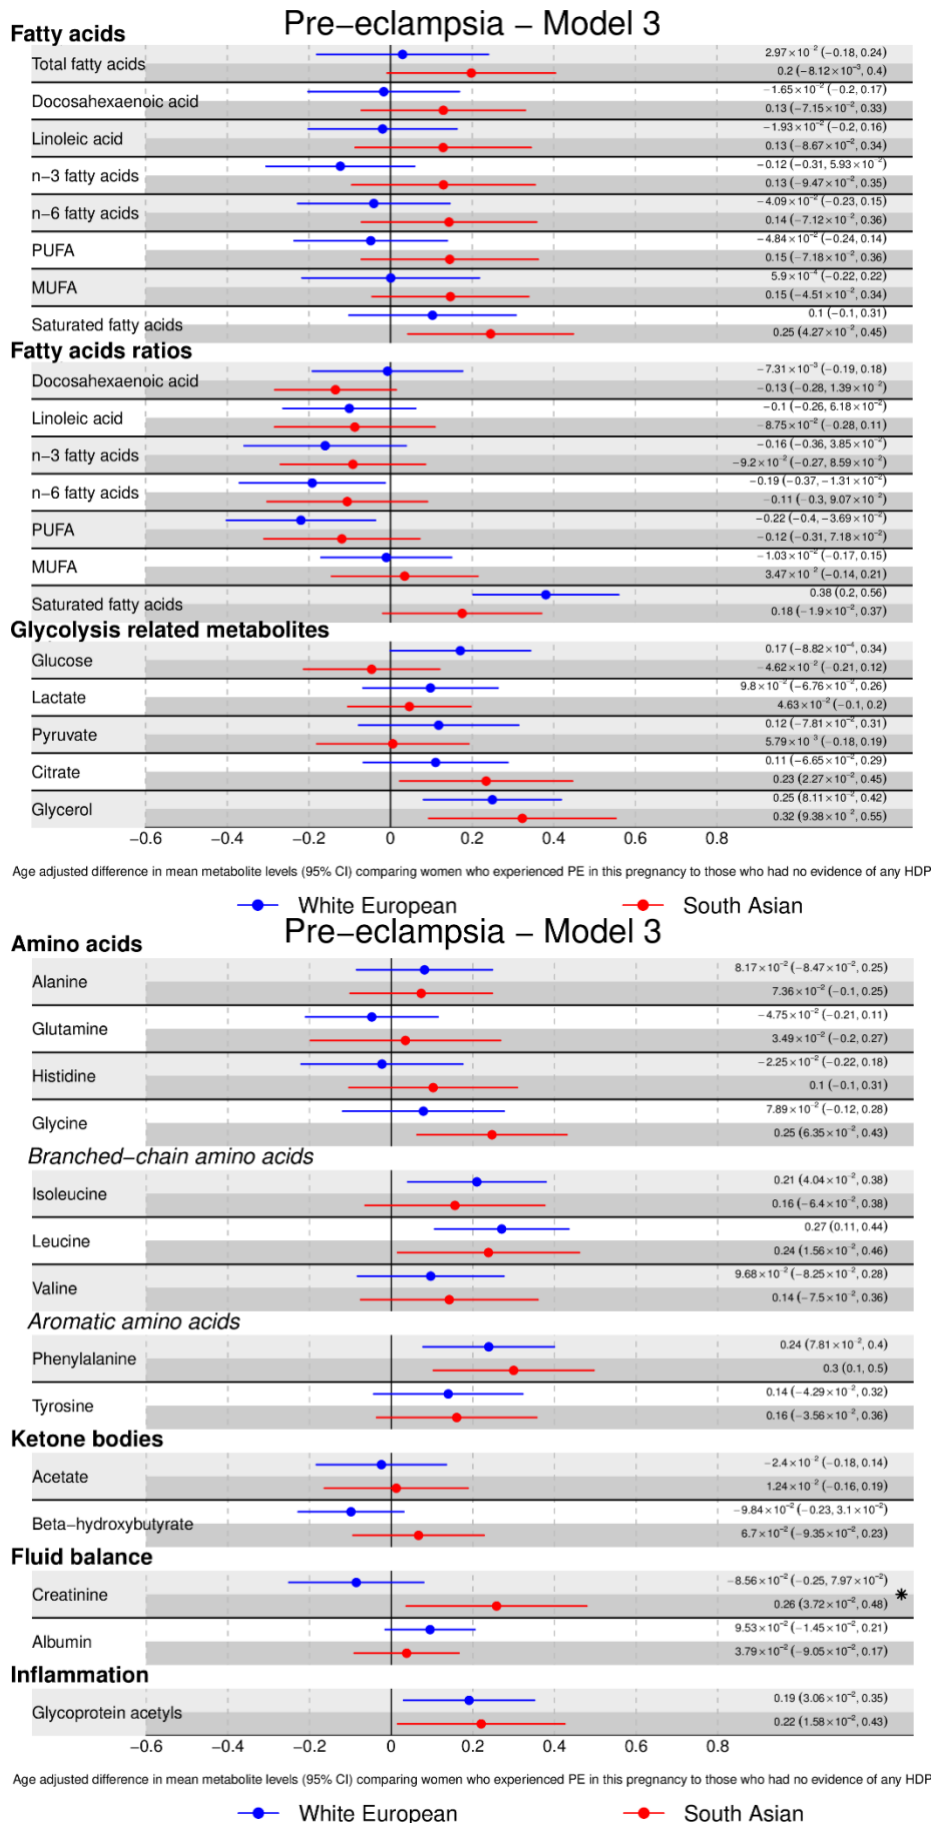

**Figure S11. Associations of maternal pre-eclampsia with pregnancy metabolic profiles stratified by ethnicity (model 1 = age-adjusted; model 2 = age-, parity- and education-adjusted, model 3 = age-, parity-, education- and BMI-adjusted).** Data points show SD differences for White European (blue) and South Asian (red) women. Error bars = 95% confidence intervals. Exact point estimates and their corresponding 95% CIs are displayed in text to the right of each point. \* denotes strong statistical evidence from the interaction test ( $P_{\text{interaction}} < 0.001$ ). Differences in quantified units (mostly mmol/l) are listed in Supplementary File 2. Abbreviations: VLDL, very low-density lipoprotein; LDL, low-density lipoprotein; HDL, high-density lipoprotein; C, cholesterol; MUFA, monounsaturated fatty acids; PUFA, polyunsaturated fatty acids

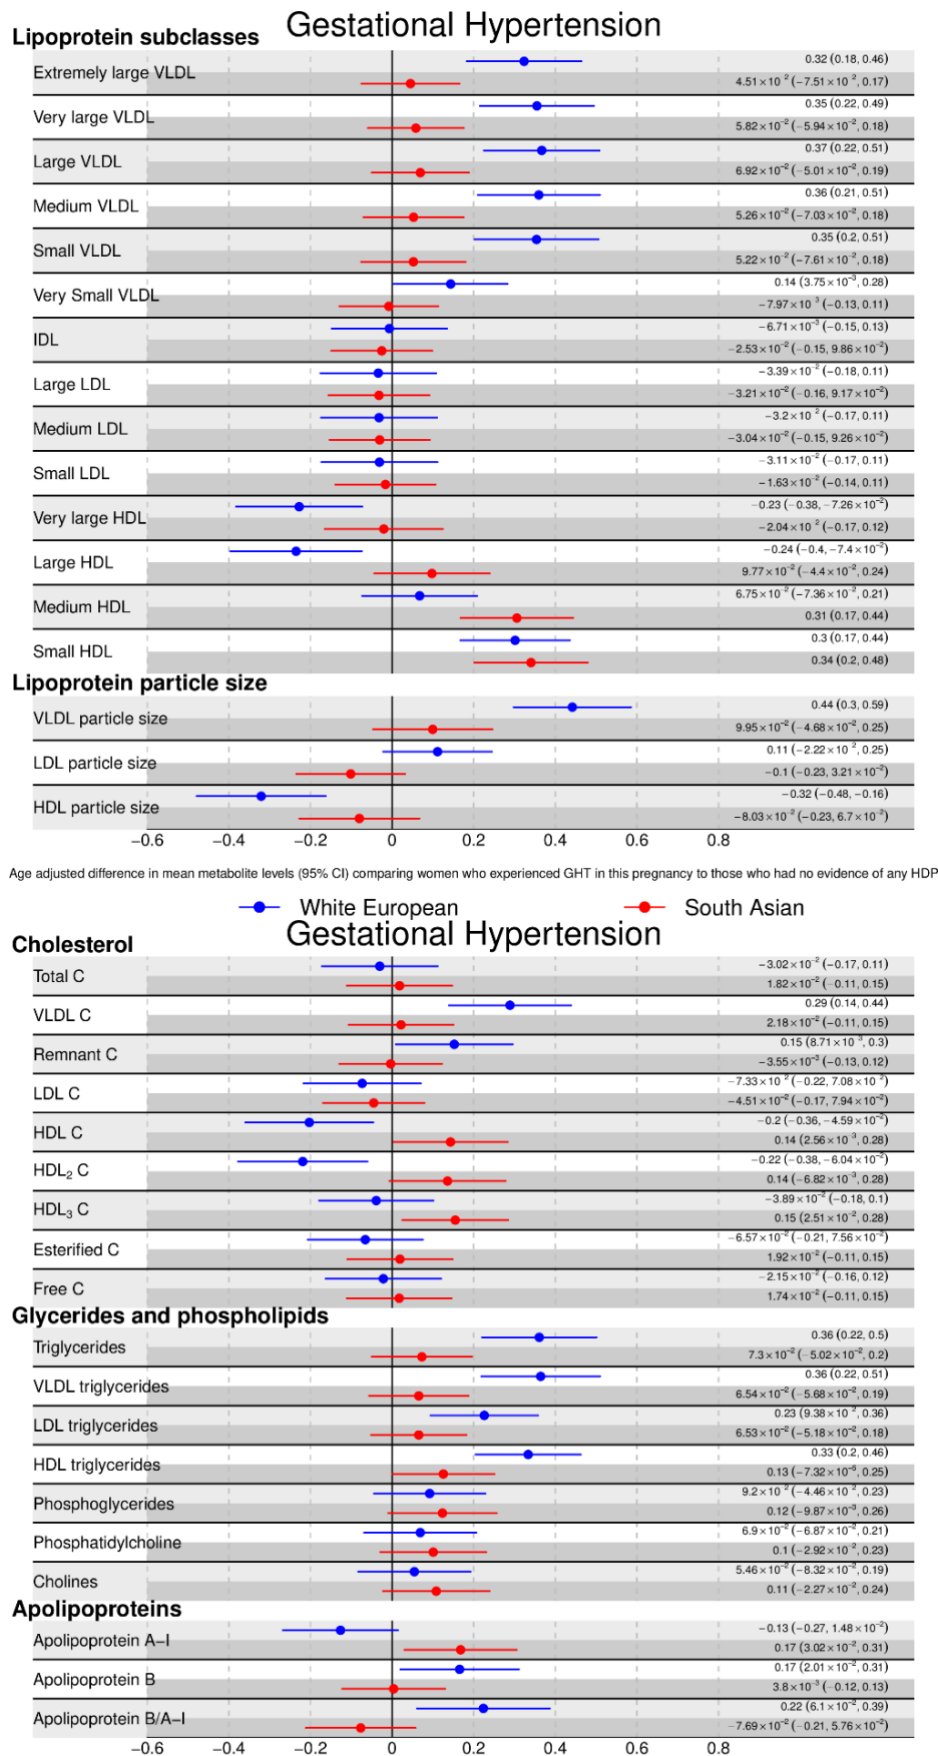

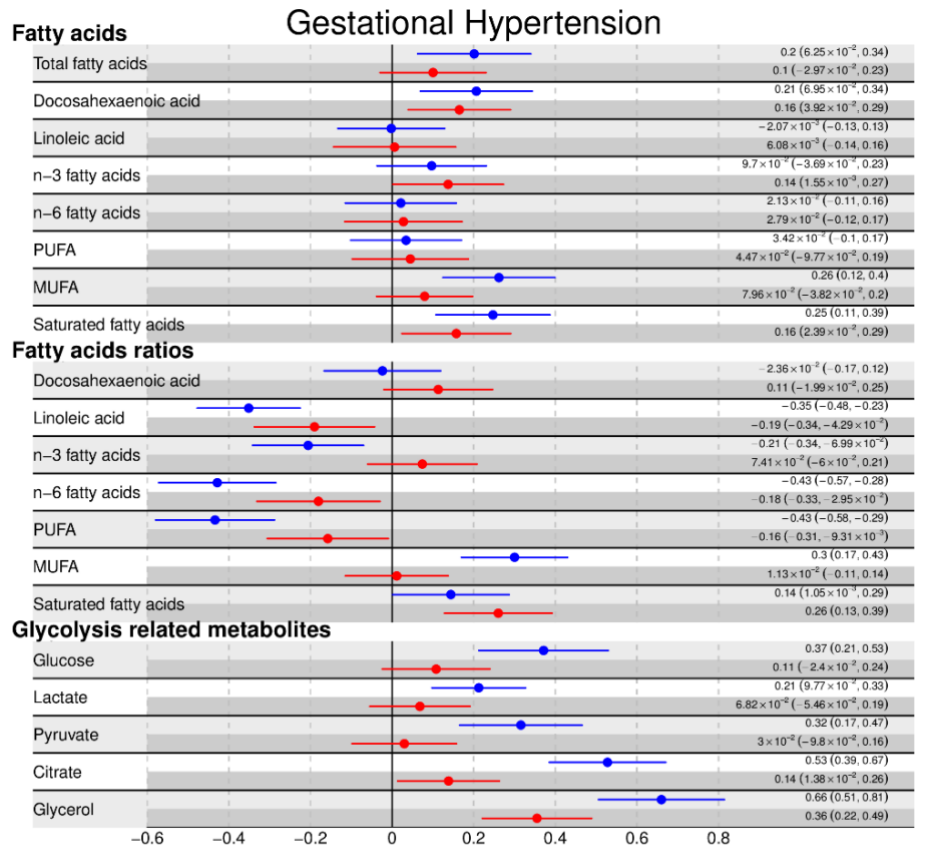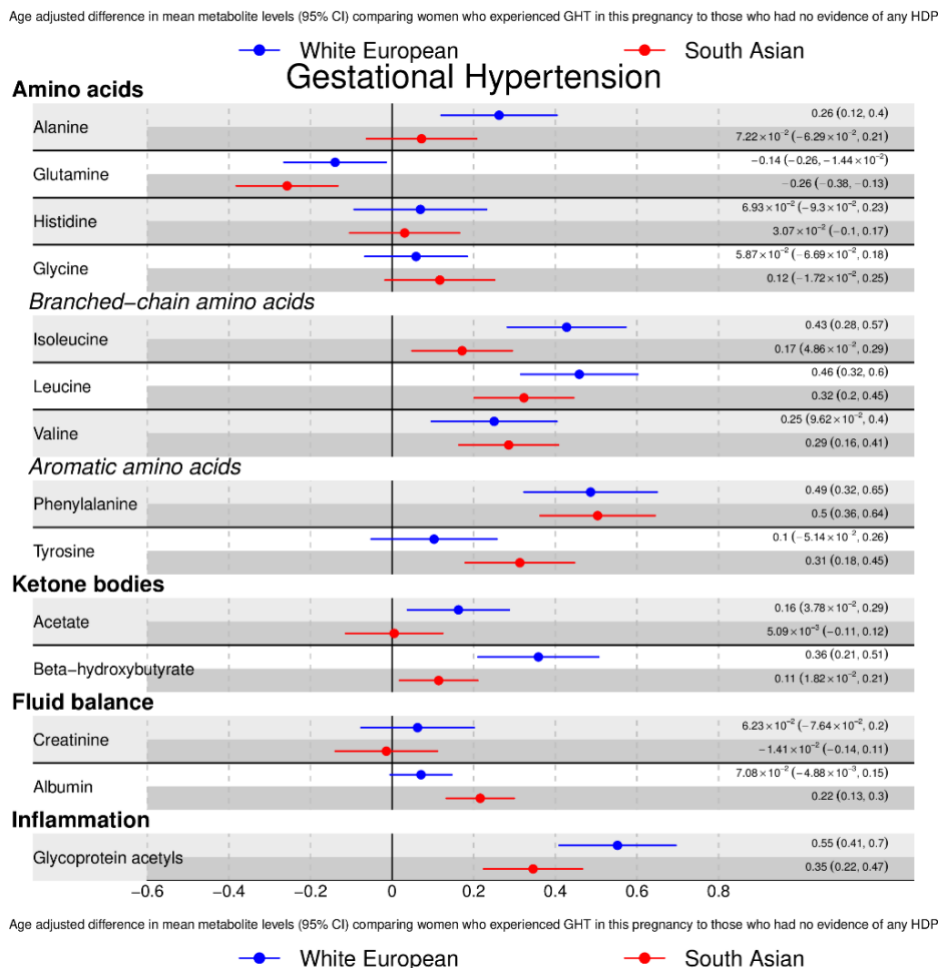

## Gestational Hypertension – Model 2

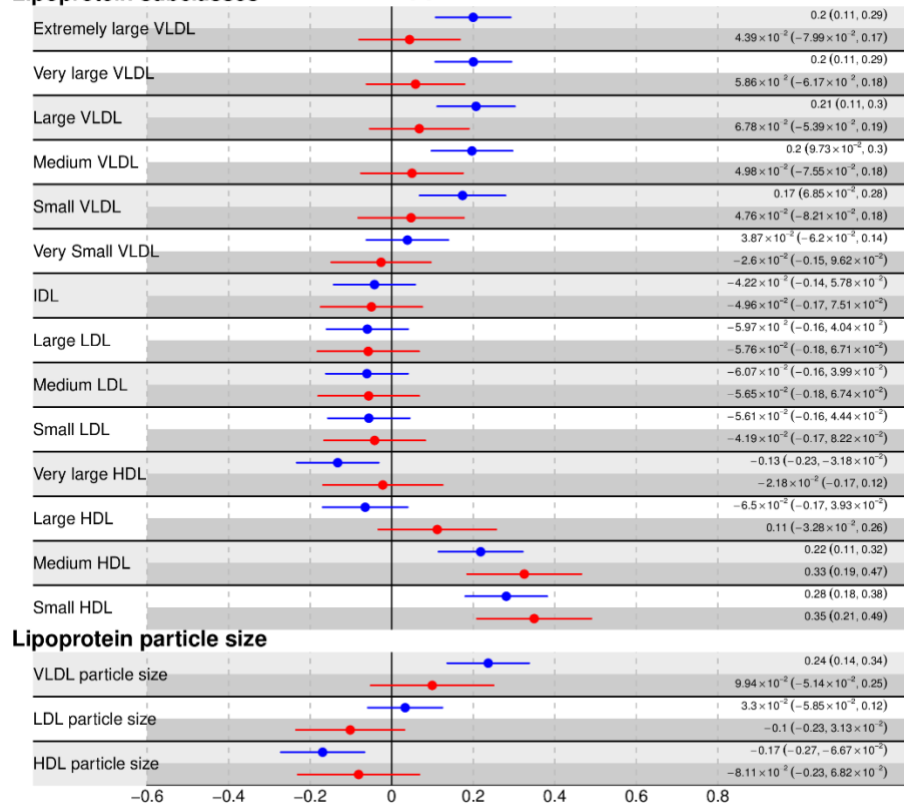

Age adjusted difference in mean metabolite levels (95% CI) comparing women who experienced GHT in this pregnancy to those who had no evidence of any HDP

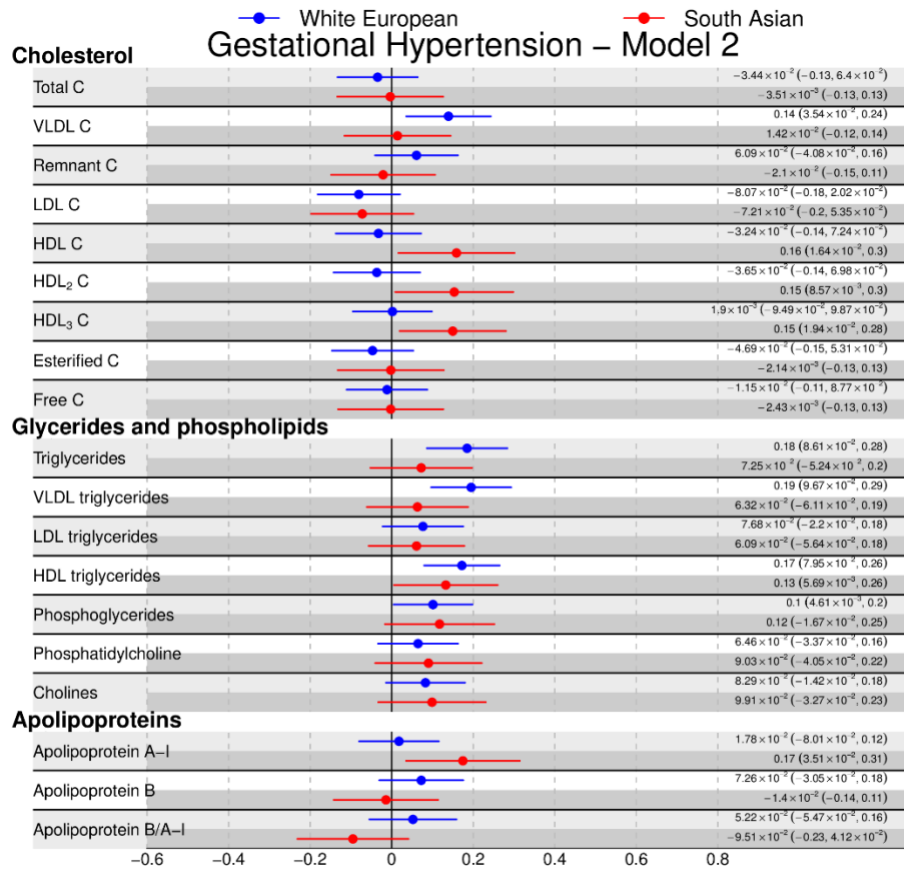

Age adjusted difference in mean metabolite levels (95% CI) comparing women who experienced GHT in this pregnancy to those who had no evidence of any HDP

● White European ● South Asian

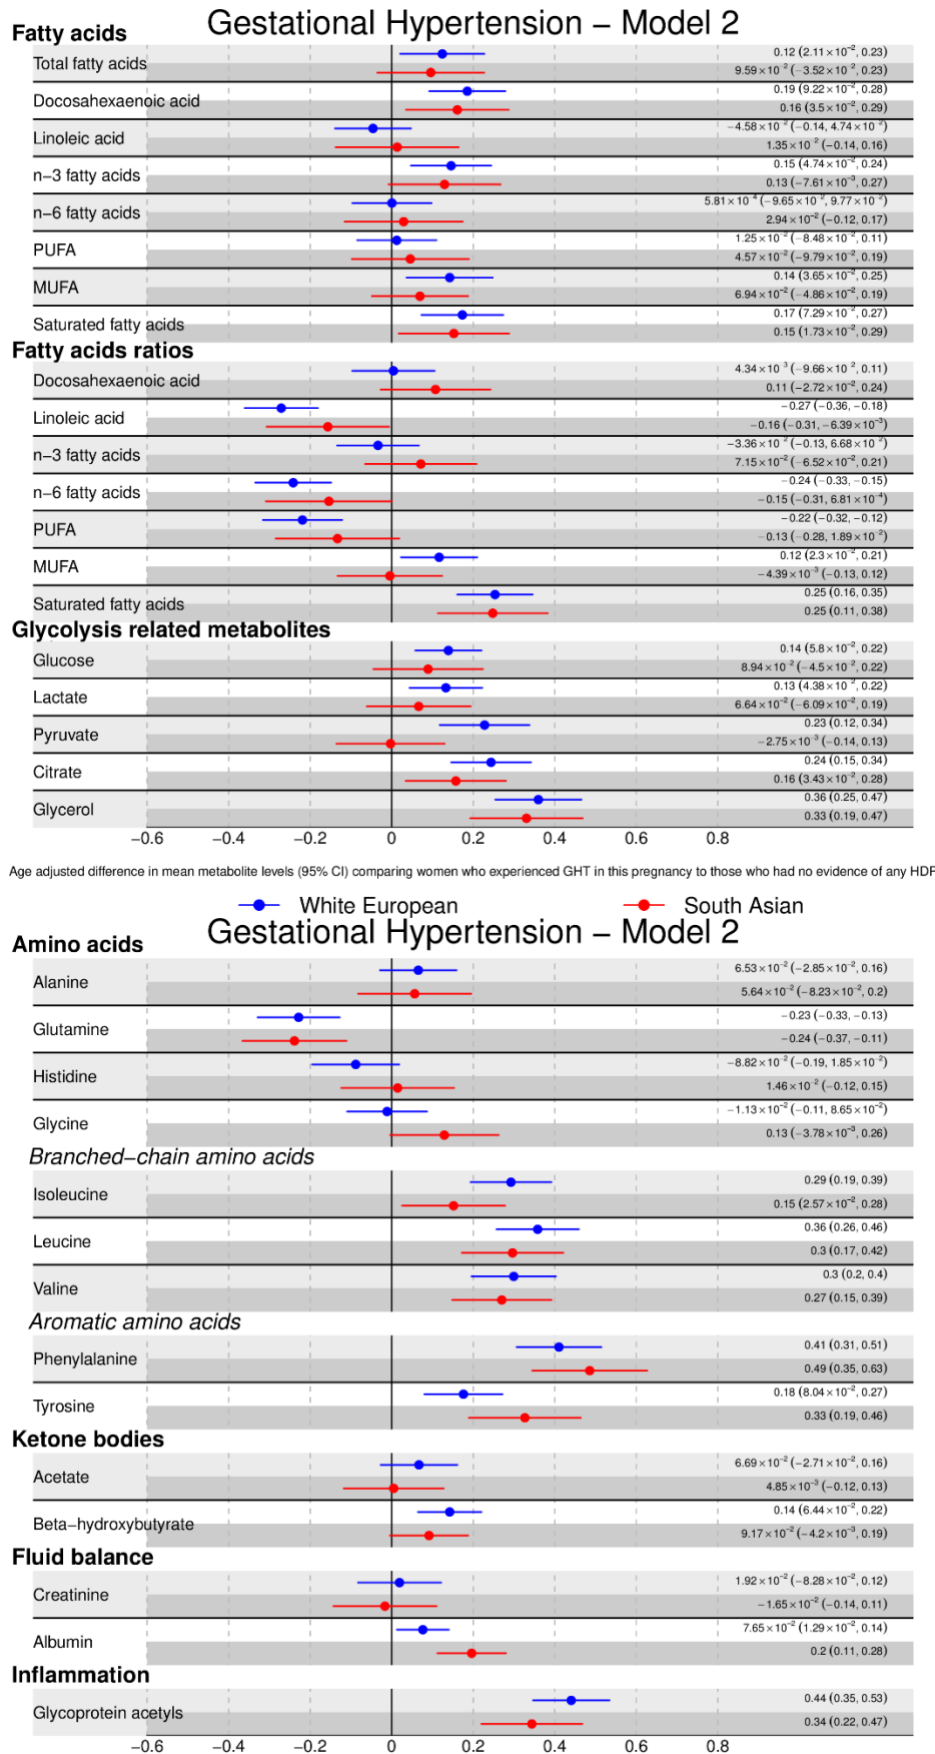

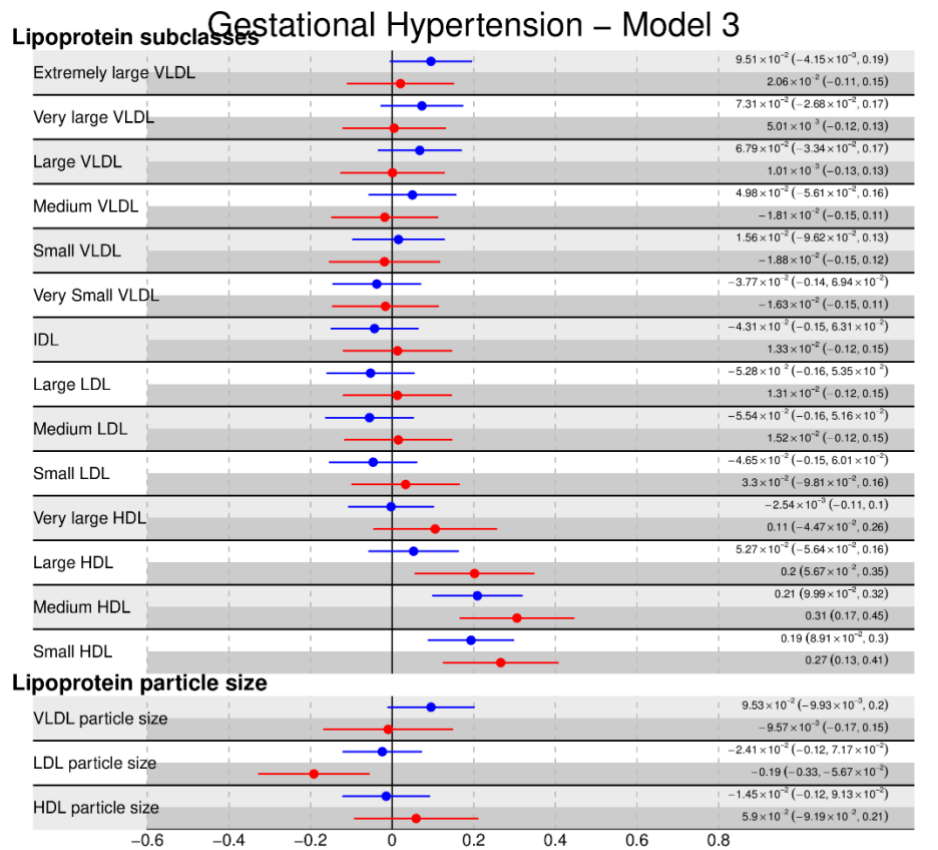

Age adjusted difference in mean metabolite levels (95% CI) comparing women who experienced GHT in this pregnancy to those who had no evidence of any HDP

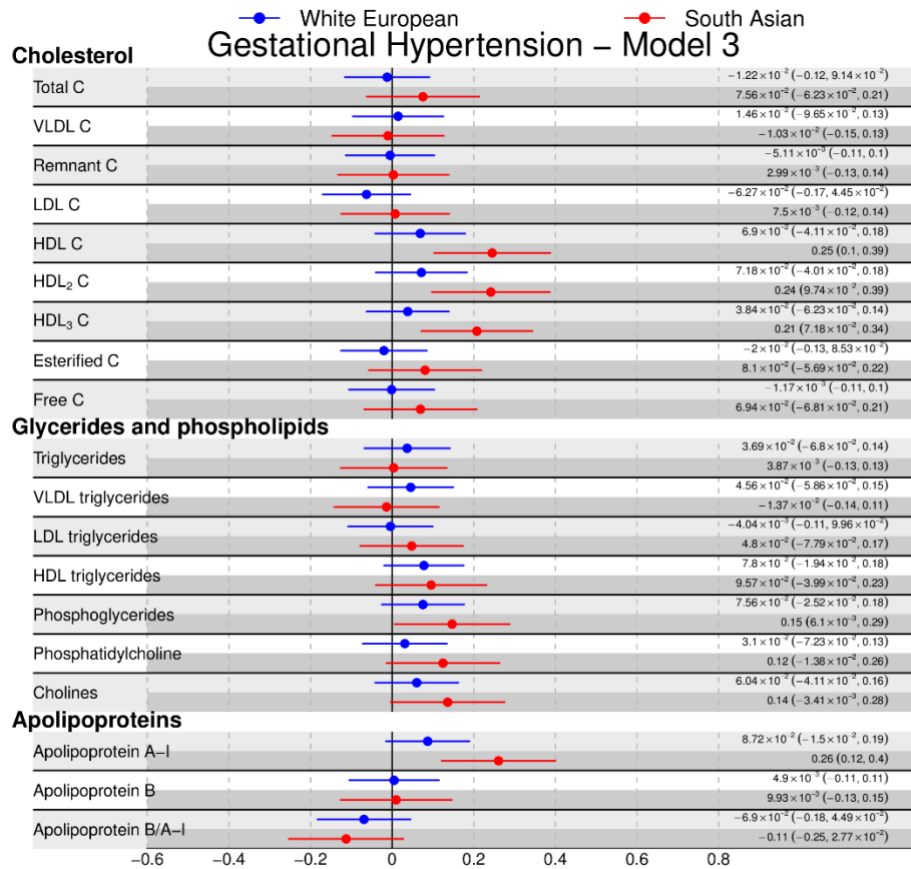

Age adjusted difference in mean metabolite levels (95% CI) comparing women who experienced GHT in this pregnancy to those who had no evidence of any HDP

● White European      ● South Asian



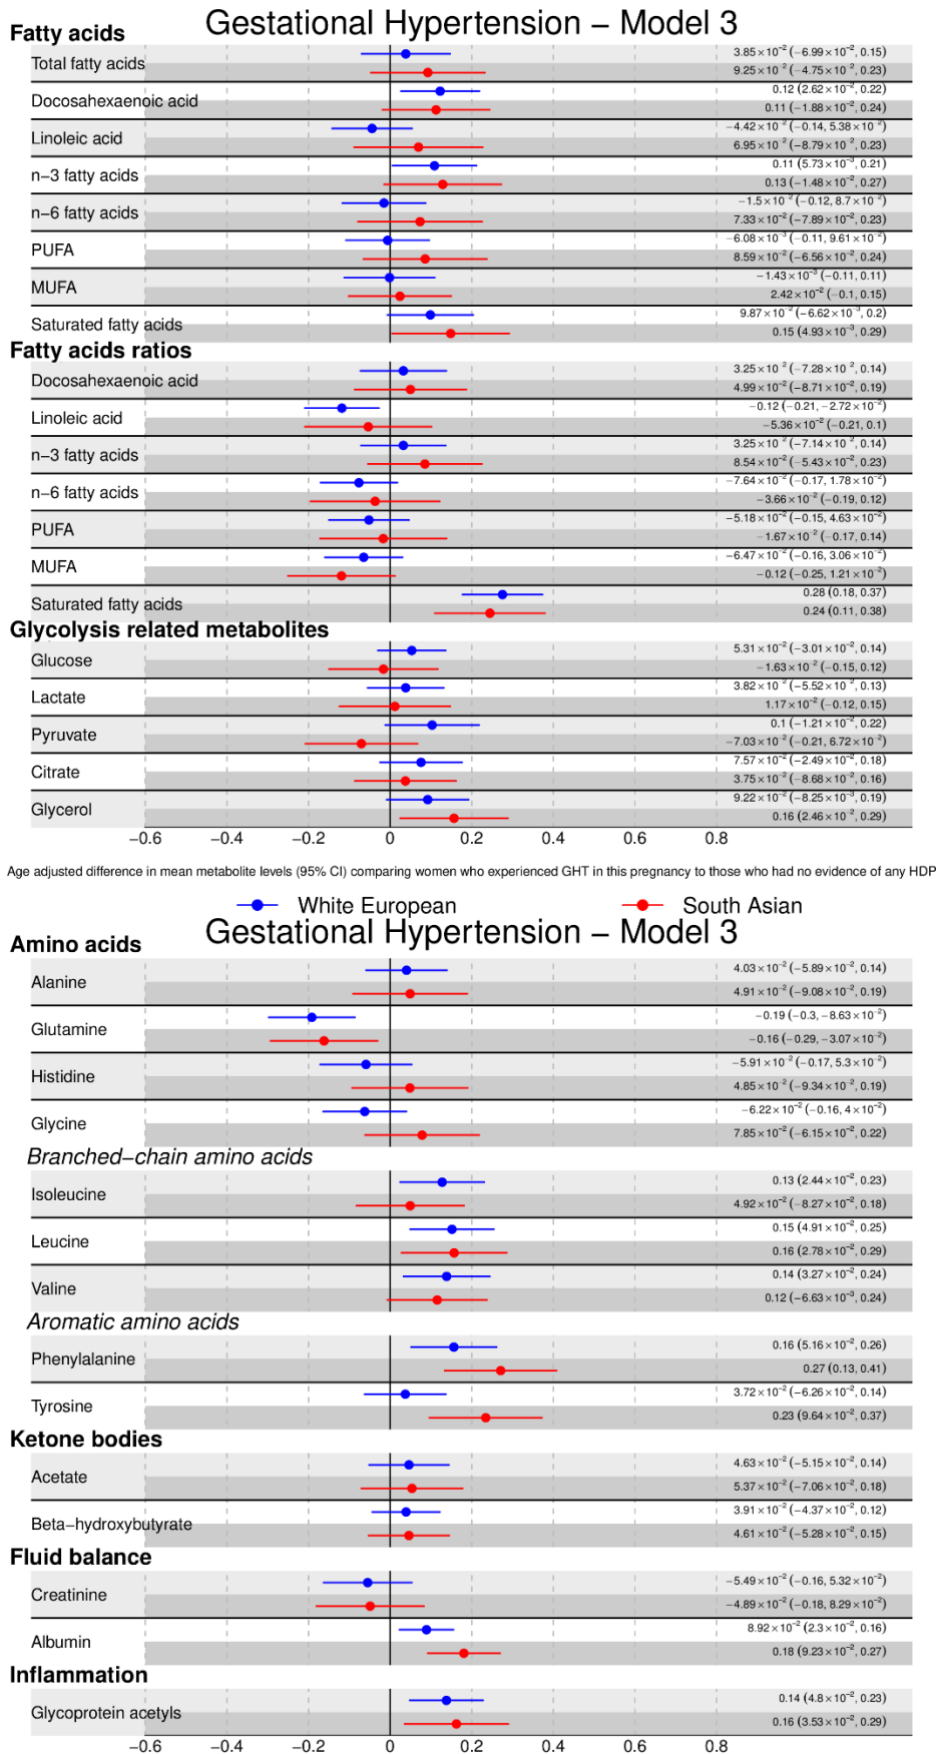

**Figure S12. Associations of maternal gestational hypertension with pregnancy metabolic profiles stratified by ethnicity (model 1 = age-adjusted; model 2 = age-, parity- and education-adjusted, model 3 = age-, parity-, education- and BMI-adjusted).** Data points show SD differences for White European (blue) and South Asian (red) women. Error bars = 95% confidence intervals. Exact point estimates and their corresponding 95% CIs are displayed in text to the right of each point. \* denotes strong statistical evidence from the interaction test ( $P_{\text{interaction}} < 0.001$ ). Differences in quantified units (mostly mmol/l) are listed in Supplementary File 2. Abbreviations: VLDL, very low-density lipoprotein; LDL, low-density lipoprotein; HDL, high-density lipoprotein; C, cholesterol; MUFA, monounsaturated fatty acids; PUFA, polyunsaturated fatty acids

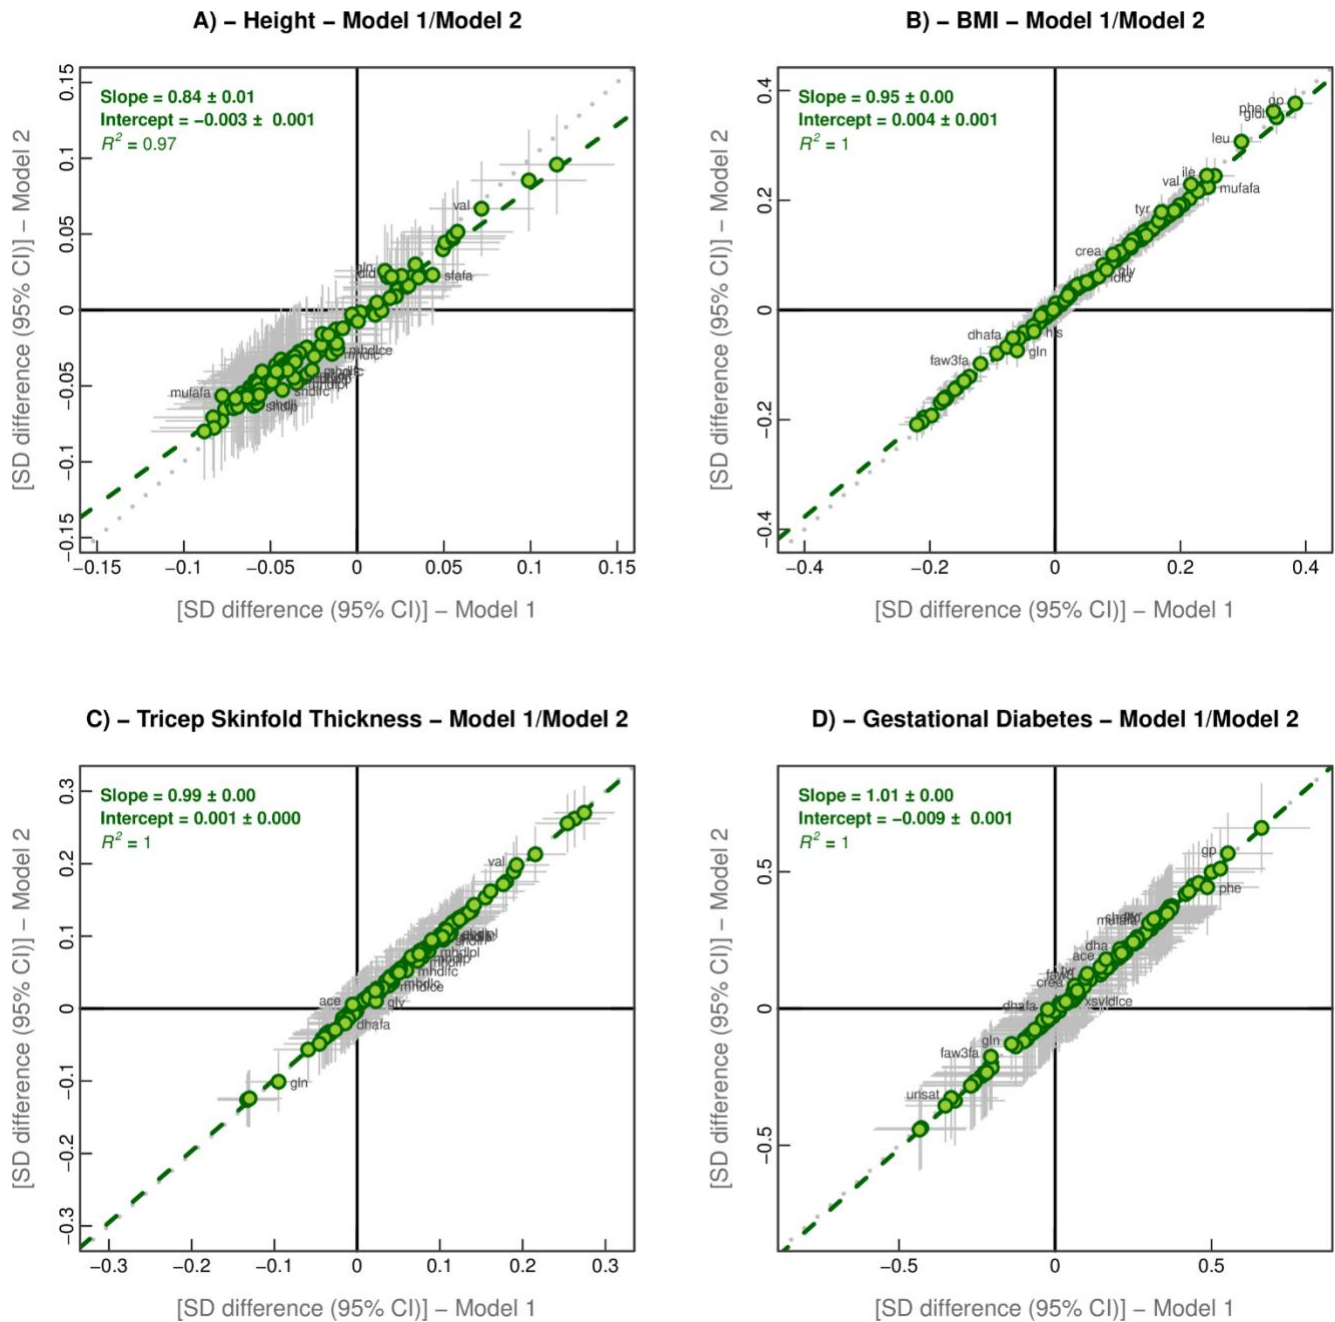

**Figure S13. Linear fit between regression model 1 (age adjusted) and regression model 2 (age, parity, education adjusted) represented by the green dashed line for maternal: height (a), BMI (b), tricep skinfold thickness (c), and gestational diabetes (d) in White European women.** Each green dot represents a metabolic trait. The positions of the dots are determined by difference in mean maternal metabolite (in SD units) for each increase of 1-SD maternal exposure in model 1 analyses (x-axis) and difference in mean maternal metabolite (in SD units) for each increase in 1-SD maternal exposure in model 2 analyses (y-axis). For binary exposures, the differences are in SD units between the exposures and non-exposed. The horizontal grey lines on each dot denote the confidence intervals (CI) for model 1 associations and the vertical grey lines indicate the CI for model 2 estimates. A linear fit of the overall concordance (the similarity in magnitude between model 1 and model 2 associations) is shown by the green dashed line. A slope of 1 with an intercept of 0 (dashed grey line), with all green dots sitting on that line, would indicate that model 1 and model 2 results had the same magnitude and direction. Note for some exposures (e.g. with Tricep skin folds and gestational diabetes) the concordance is so high that the dotted grey line is difficult to see as the linear fit lie from the data (green dashed) covers it. The proportion of variance in model 2 associations that is explained by model 1 associations ( $R^2$ ) in these analyses provides a measure of goodness of linear fit, with higher values (closer to 1) indicating higher consistency between models.

**A) – Pre-eclampsia – Model 1/Model 2**

**B) – Gestational Hypertension – Model 1/Model 2**

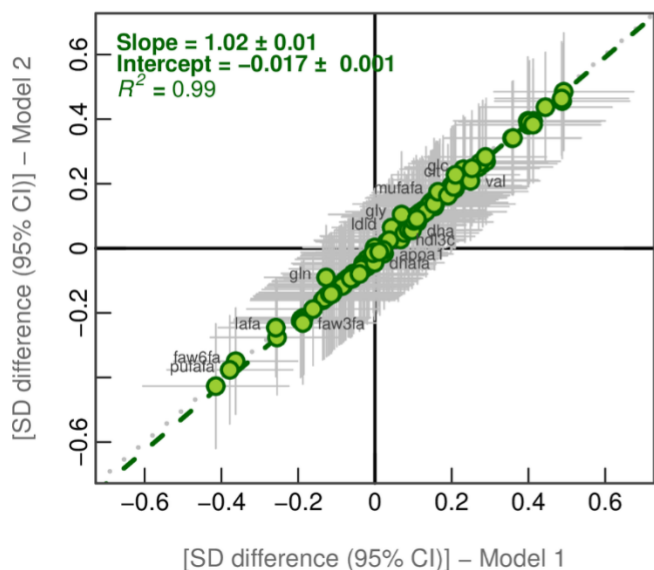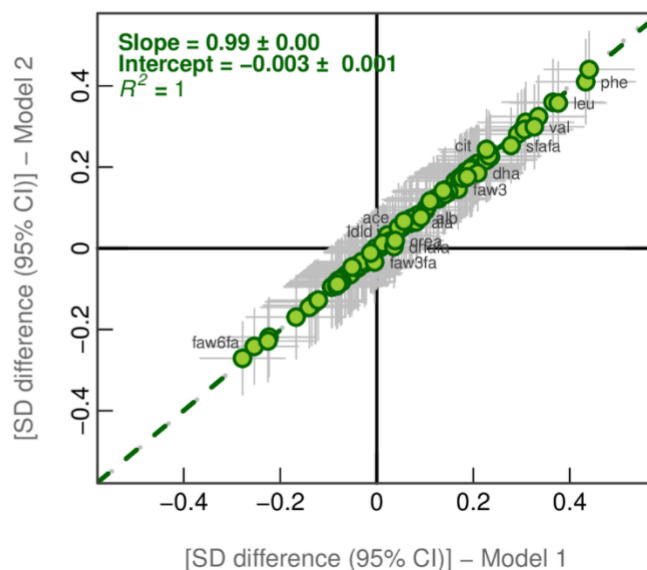

**Figure S14. Linear fit between regression model 1 (age adjusted) and regression model 2 (age, parity, education adjusted) represented by the green dashed line for maternal: pre-eclampsia (a) and gestational hypertension (b) in White European women.** Each green dot represents a metabolic trait. The positions of the dots are determined by difference in mean maternal metabolite (in SD units) for each increase of 1-SD maternal exposure in model 1 analyses (x-axis) and difference in mean maternal metabolite (in SD units) for each increase in 1-SD maternal exposure in model 2 analyses (y-axis). For binary exposures, the differences are in SD units between the exposures and non-exposed. The horizontal grey lines on each dot denote the confidence intervals (CI) for model 1 associations and the vertical grey lines indicate the CI for model 2 estimates. A linear fit of the overall concordance (the similarity in magnitude between model 1 and model 2 associations) is shown by the green dashed line. A slope of 1 with an intercept of 0 (dashed grey line), with all green dots sitting on that line, would indicate that model 1 and model 2 results had the same magnitude and direction. Note for some exposures (e.g. with Tricep skin folds and gestational diabetes) the concordance is so high that the dotted grey line is difficult to see as the linear fit lie from the data (green dashed) covers it. The proportion of variance in model 2 associations that is explained by model 1 associations ( $R^2$ ) in these analyses provides a measure of goodness of linear fit, with higher values (closer to 1) indicating higher consistency between models.

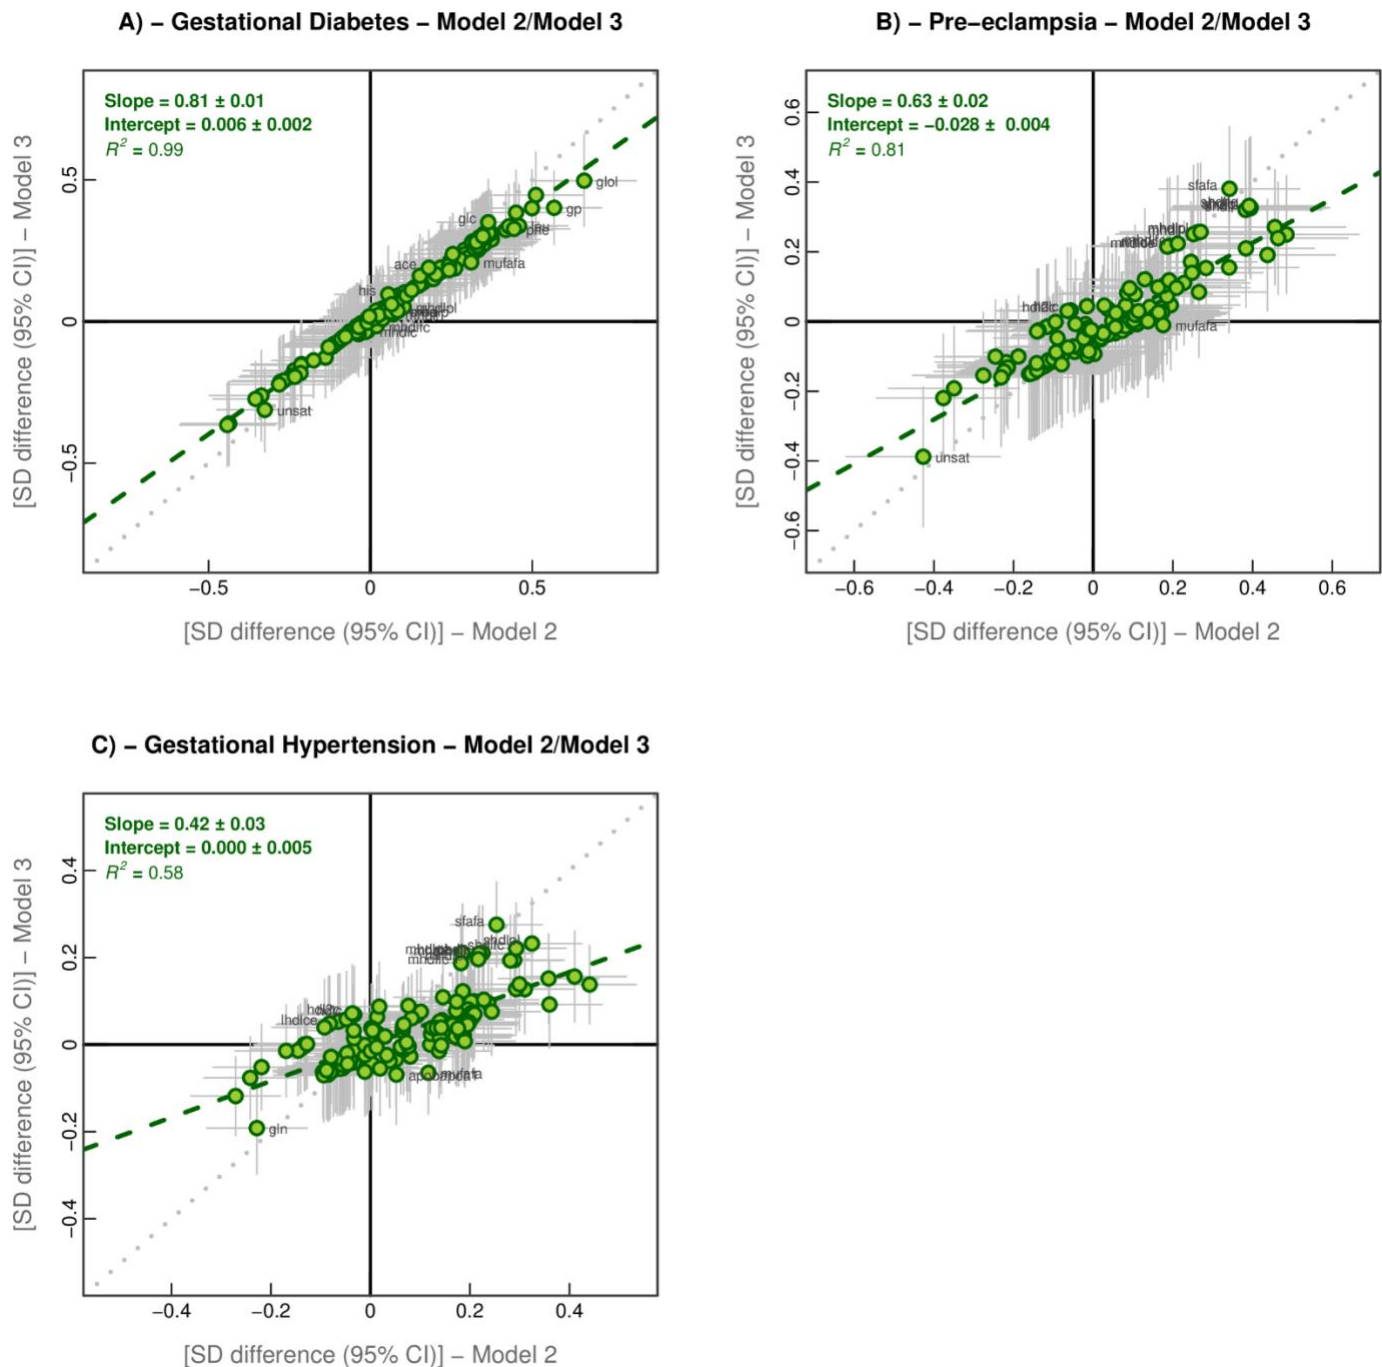

**Figure S15. Linear fit between regression model 2 (age, parity, education adjusted) and regression model 3 (age, parity, education, BMI adjusted) represented by the green dashed line for maternal: gestational diabetes (a), pre-eclampsia (b) and gestational hypertension (c) in White European women.** Each green dot represents a metabolic trait. The positions of the dots are determined by difference in mean maternal metabolite (in SD units) for each increase of 1-SD maternal exposure in model 2 analyses (x-axis) and difference in mean maternal metabolite (in SD units) for each increase in 1-SD maternal exposure in model 3 analyses (y-axis). For binary exposures, the differences are in SD units between the exposures and non-exposed. The horizontal grey lines on each dot denote the confidence intervals (CI) for model 1 associations and the vertical grey lines indicate the CI for model 2 estimates. A linear fit of the overall concordance (the similarity in magnitude between model 1 and model 2 associations) is shown by the green dashed line. A slope of 1 with an intercept of 0 (dashed grey line), with all green dots sitting on that line, would indicate that model 1 and model 2 results had the same magnitude and direction. The proportion of variance in model 2 associations that is explained by model 1 associations ( $R^2$ ) in these analyses provides a measure of goodness of linear fit, with higher values (closer to 1) indicating higher consistency between models.

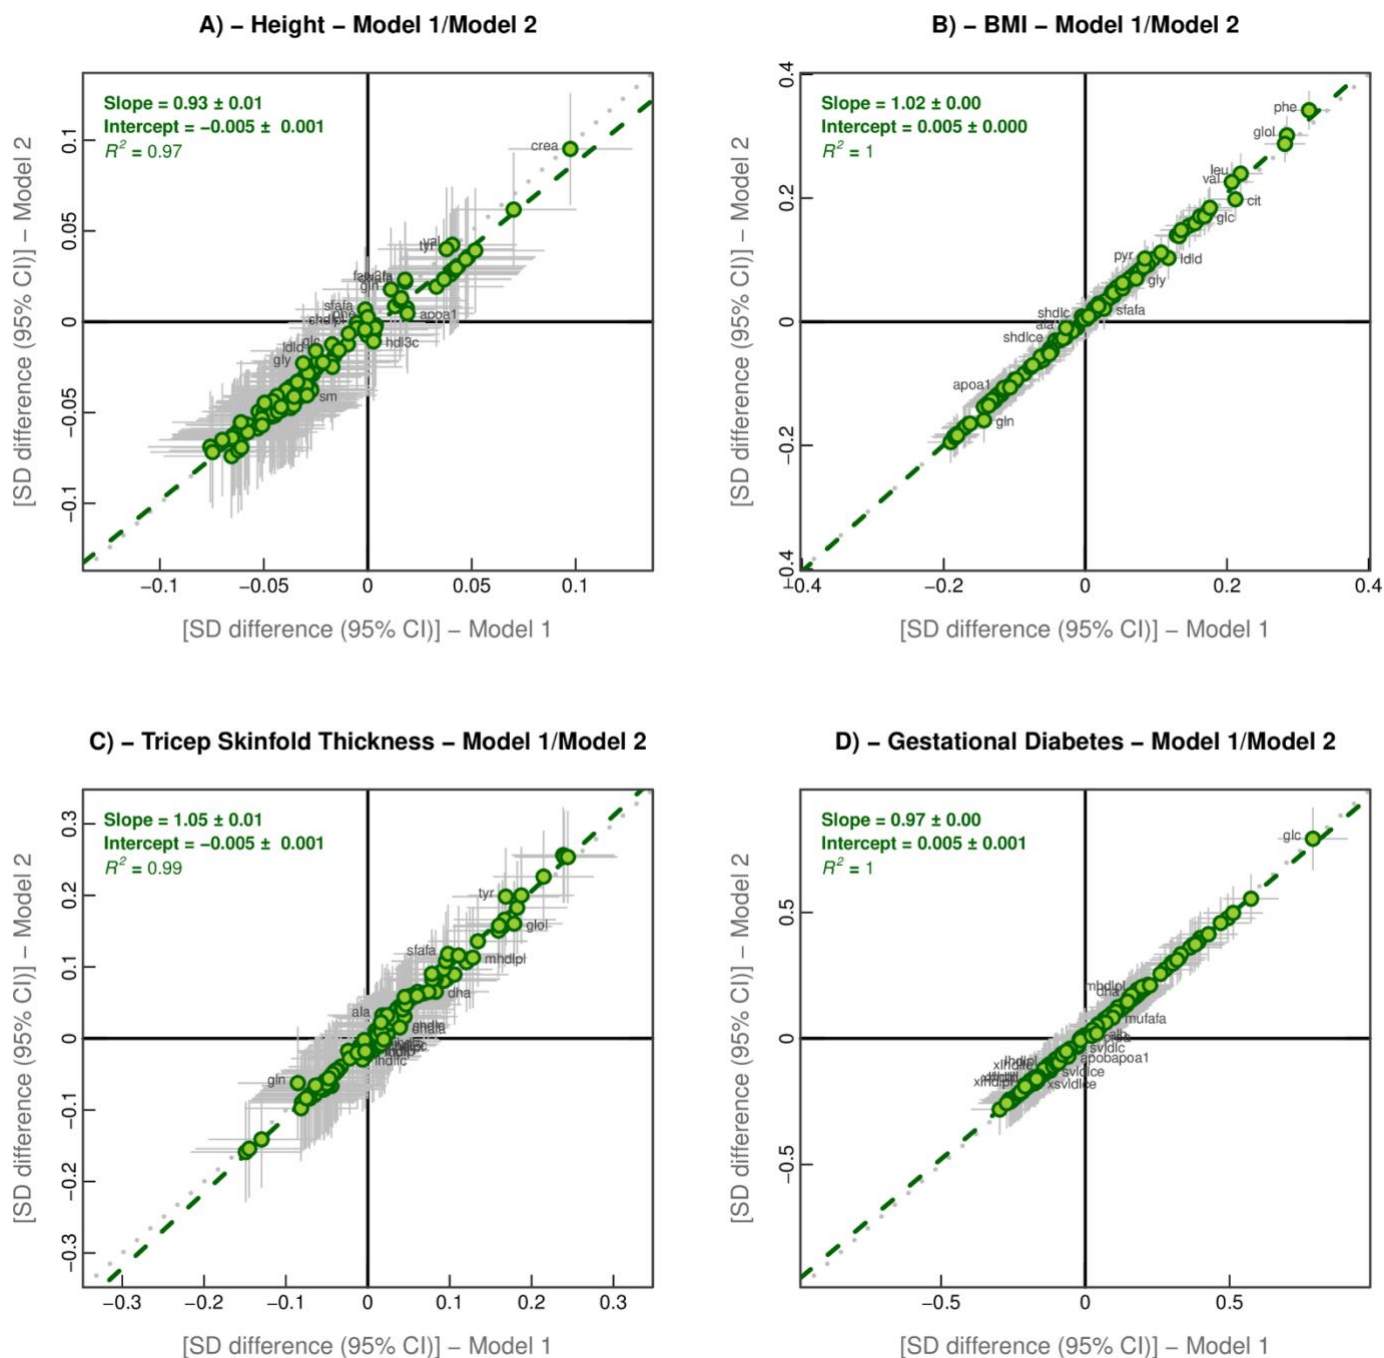

**Figure S16. Linear fit between regression model 1 (age adjusted) and regression model 2 (age, parity, education adjusted) represented by the green dashed line for maternal: height (a), BMI (b), tricep skinfold thickness (c), and gestational diabetes (d) in South Asian women.** Each green dot represents a metabolic trait. The positions of the dots are determined by difference in mean maternal metabolite (in SD units) for each increase of 1-SD maternal exposure in model 1 analyses (x-axis) and difference in mean maternal metabolite (in SD units) for each increase in 1-SD maternal exposure in model 2 analyses (y-axis). For binary exposures, the differences are in SD units between the exposures and non-exposed. The horizontal grey lines on each dot denote the confidence intervals (CI) for model 1 associations and the vertical grey lines indicate the CI for model 2 estimates. A linear fit of the overall concordance (the similarity in magnitude between model 1 and model 2 associations) is shown by the green dashed line. A slope of 1 with an intercept of 0 (dashed grey line), with all green dots sitting on that line, would indicate that model 1 and model 2 results had the same magnitude and direction. The proportion of variance in model 2 associations that is explained by model 1 associations ( $R^2$ ) in these analyses provides a measure of goodness of linear fit, with higher values (closer to 1) indicating higher consistency between models.



**A) – Pre-eclampsia – Model 1/Model 2**

**B) – Gestational Hypertension – Model 1/Model 2**

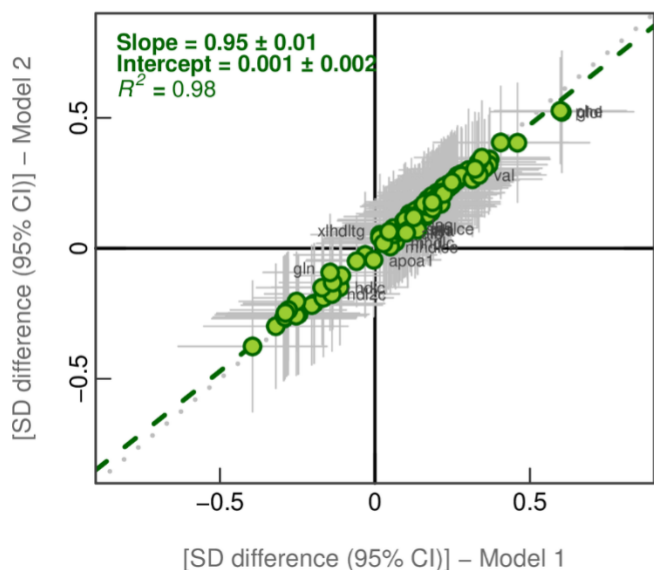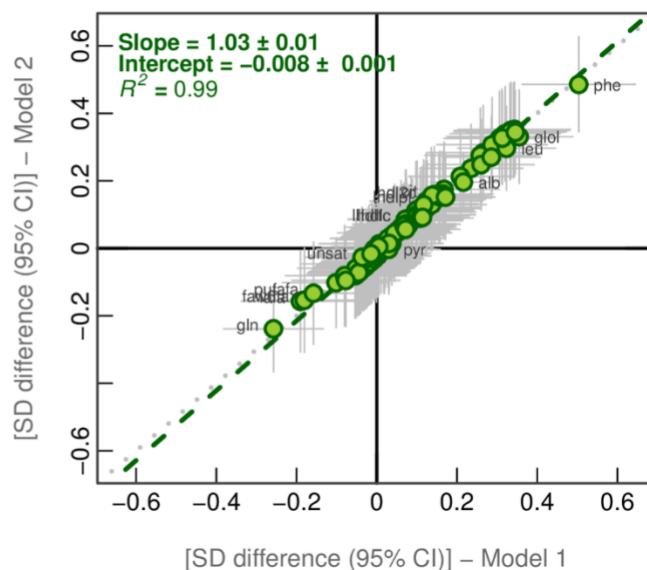

**Figure S17. Linear fit between regression model 1 (age adjusted) and regression model 2 (age, parity, education adjusted) represented by the green dashed line for maternal: pre-eclampsia (a) and gestational hypertension(b) in South Asian women.** Each green dot represents a metabolic trait. The positions of the dots are determined by difference in mean maternal metabolite (in SD units) for each increase of 1-SD maternal exposure in model 1 analyses (x-axis) and difference in mean maternal metabolite (in SD units) for each increase in 1-SD maternal exposure in model 2 analyses (y-axis). For binary exposures, the differences are in SD units between the exposures and non-exposed. The horizontal grey lines on each dot denote the confidence intervals (CI) for model 1 associations and the vertical grey lines indicate the CI for model 2 estimates. A linear fit of the overall concordance (the similarity in magnitude between model 1 and model 2 associations) is shown by the green dashed line. A slope of 1 with an intercept of 0 (dashed grey line), with all green dots sitting on that line, would indicate that model 1 and model 2 results had the same magnitude and direction. The proportion of variance in model 2 associations that is explained by model 1 associations ( $R^2$ ) in these analyses provides a measure of goodness of linear fit, with higher values (closer to 1) indicating higher consistency between models.

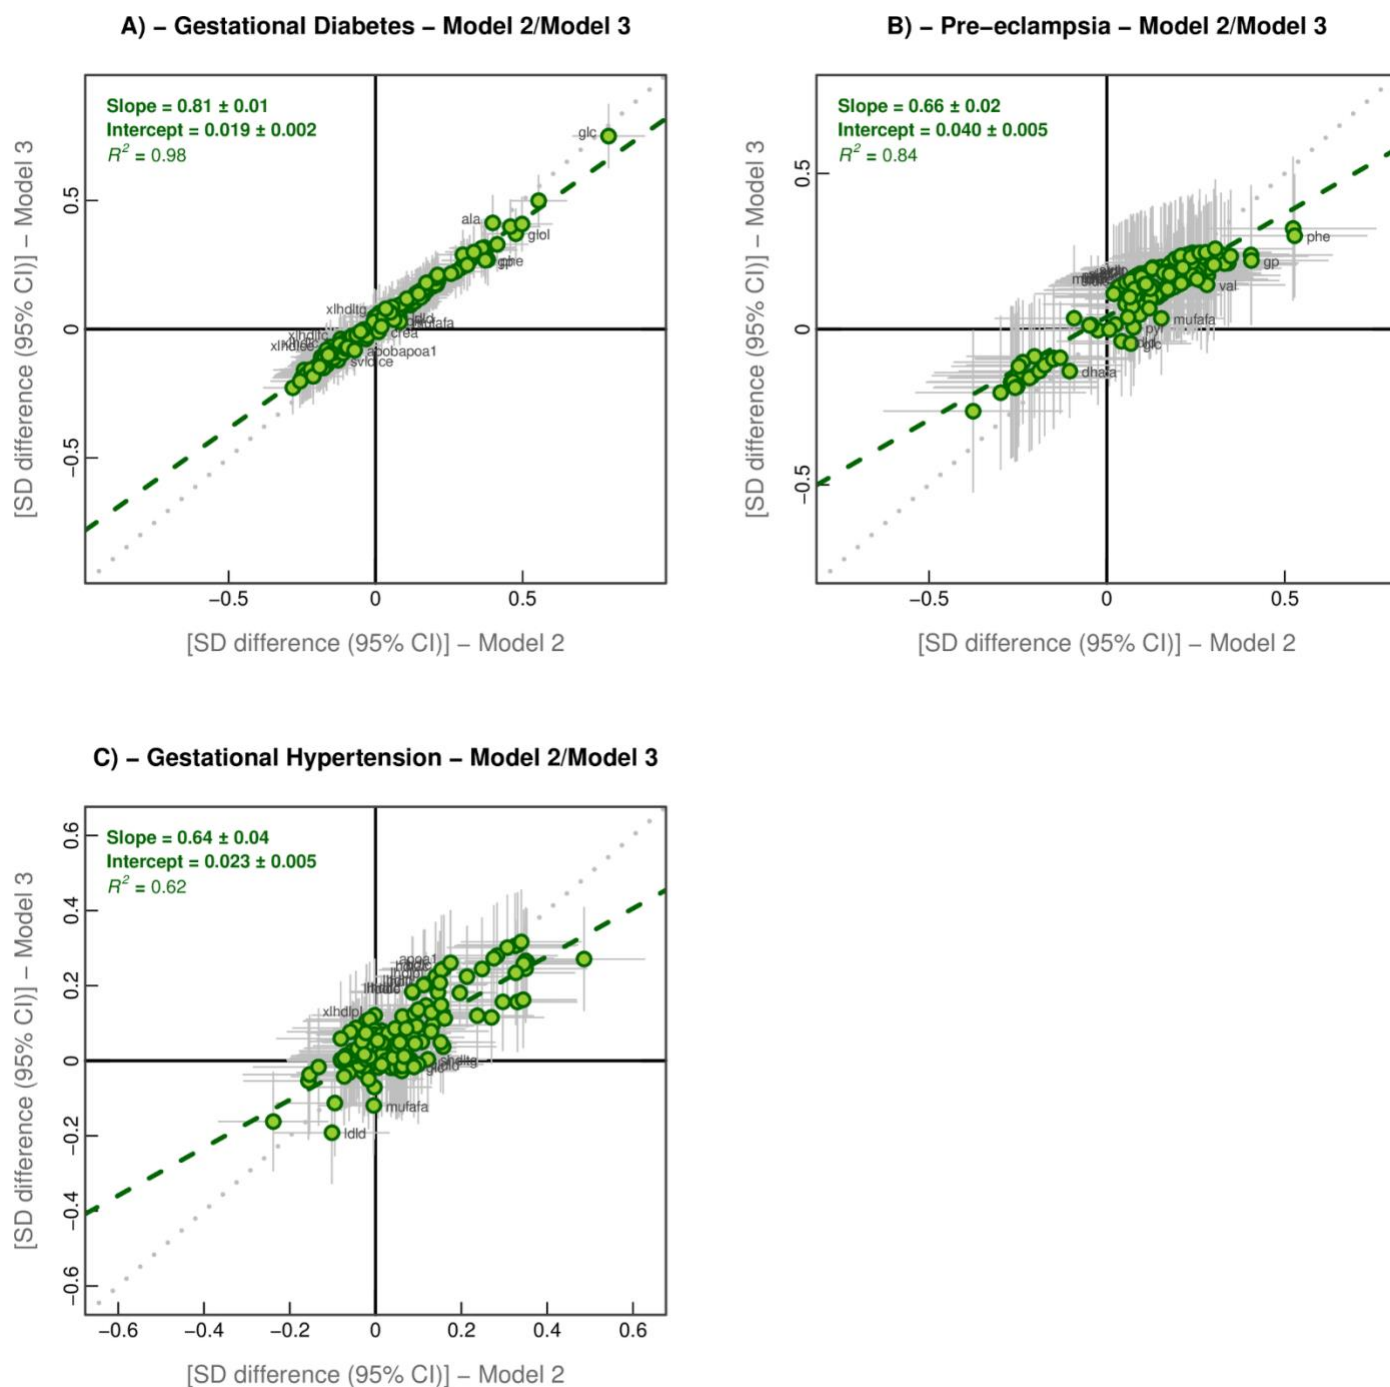

**Figure S18. Linear fit between regression model 2 (age, parity, education adjusted) and regression model 3 (age, parity, education, BMI adjusted) represented by the green dashed line for maternal: gestational diabetes (a), pre-eclampsia (b) and gestational hypertension (c) in South Asian women.** Each green dot represents a metabolic trait. The positions of the dots are determined by difference in mean maternal metabolite (in SD units) for each increase of 1-SD maternal exposure in model 2 analyses (x-axis) and difference in mean maternal metabolite (in SD units) for each increase in 1-SD maternal exposure in model 3 analyses (y-axis). For binary exposures, the differences are in SD units between the exposures and non-exposed. The horizontal grey lines on each dot denote the confidence intervals (CI) for model 1 associations and the vertical grey lines indicate the CI for model 2 estimates. A linear fit of the overall concordance (the similarity in magnitude between model 1 and model 2 associations) is shown by the green dashed line. A slope of 1 with an intercept of 0 (dashed grey line), with all green dots sitting on that line, would indicate that model 1 and model 2 results had the same magnitude and direction. The proportion of variance in model 2 associations that is explained by model 1 associations ( $R^2$ ) in these analyses provides a measure of goodness of linear fit, with higher values (closer to 1) indicating higher consistency between models.



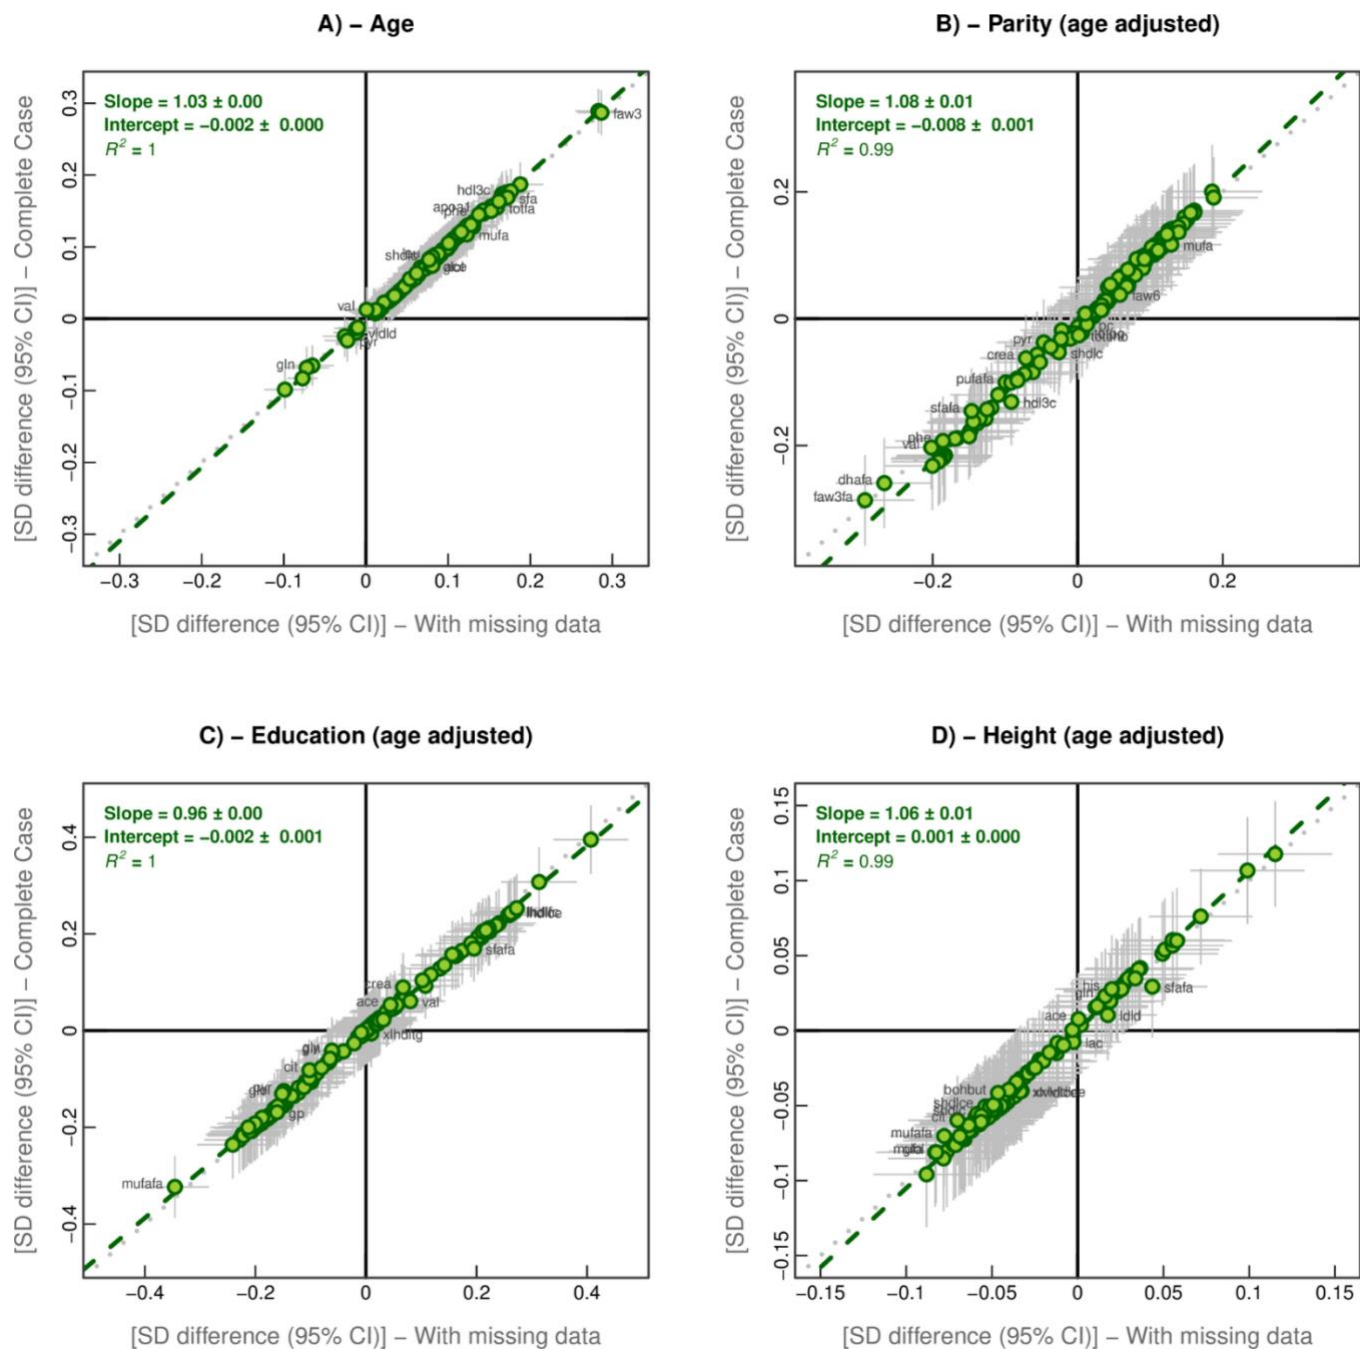

**Figure S19. Sensitivity Analysis 1: Linear fit between missing data and complete case analyses for age-adjusted models (green dashed line): maternal age (a), parity (b), education (c), and height (d) in *White European* women.** Each green dot represents a metabolic trait. The positions of the dots are determined by difference in mean maternal metabolite (in SD units) for each increase of 1-SD maternal exposure in the main analyses whereby data were not complete (x-axis) and difference in mean maternal metabolite (in SD units) for each increase in 1-SD maternal exposure in complete-case analyses (y-axis). For dichotomous exposures, the differences are in SD units between the exposures and non-exposed. Missing data is described in table 1 of the main text. The horizontal grey lines on each dot denote the confidence intervals (CI) for main analyses associations and the vertical grey lines indicate the CI for complete-case estimates. A linear fit of the overall concordance (the similarity in magnitude between complete case and non complete case associations) is shown by the green dashed line. A slope of 1 with an intercept of 0 (dashed grey line), with all green dots sitting on that line, would indicate that results had the same magnitude and direction. The proportion of variance in non complete case associations that is explained by complete case associations ( $R^2$ ) in these analyses provides a measure of goodness of linear fit, with higher values (closer to 1) indicating higher consistency between complete case.

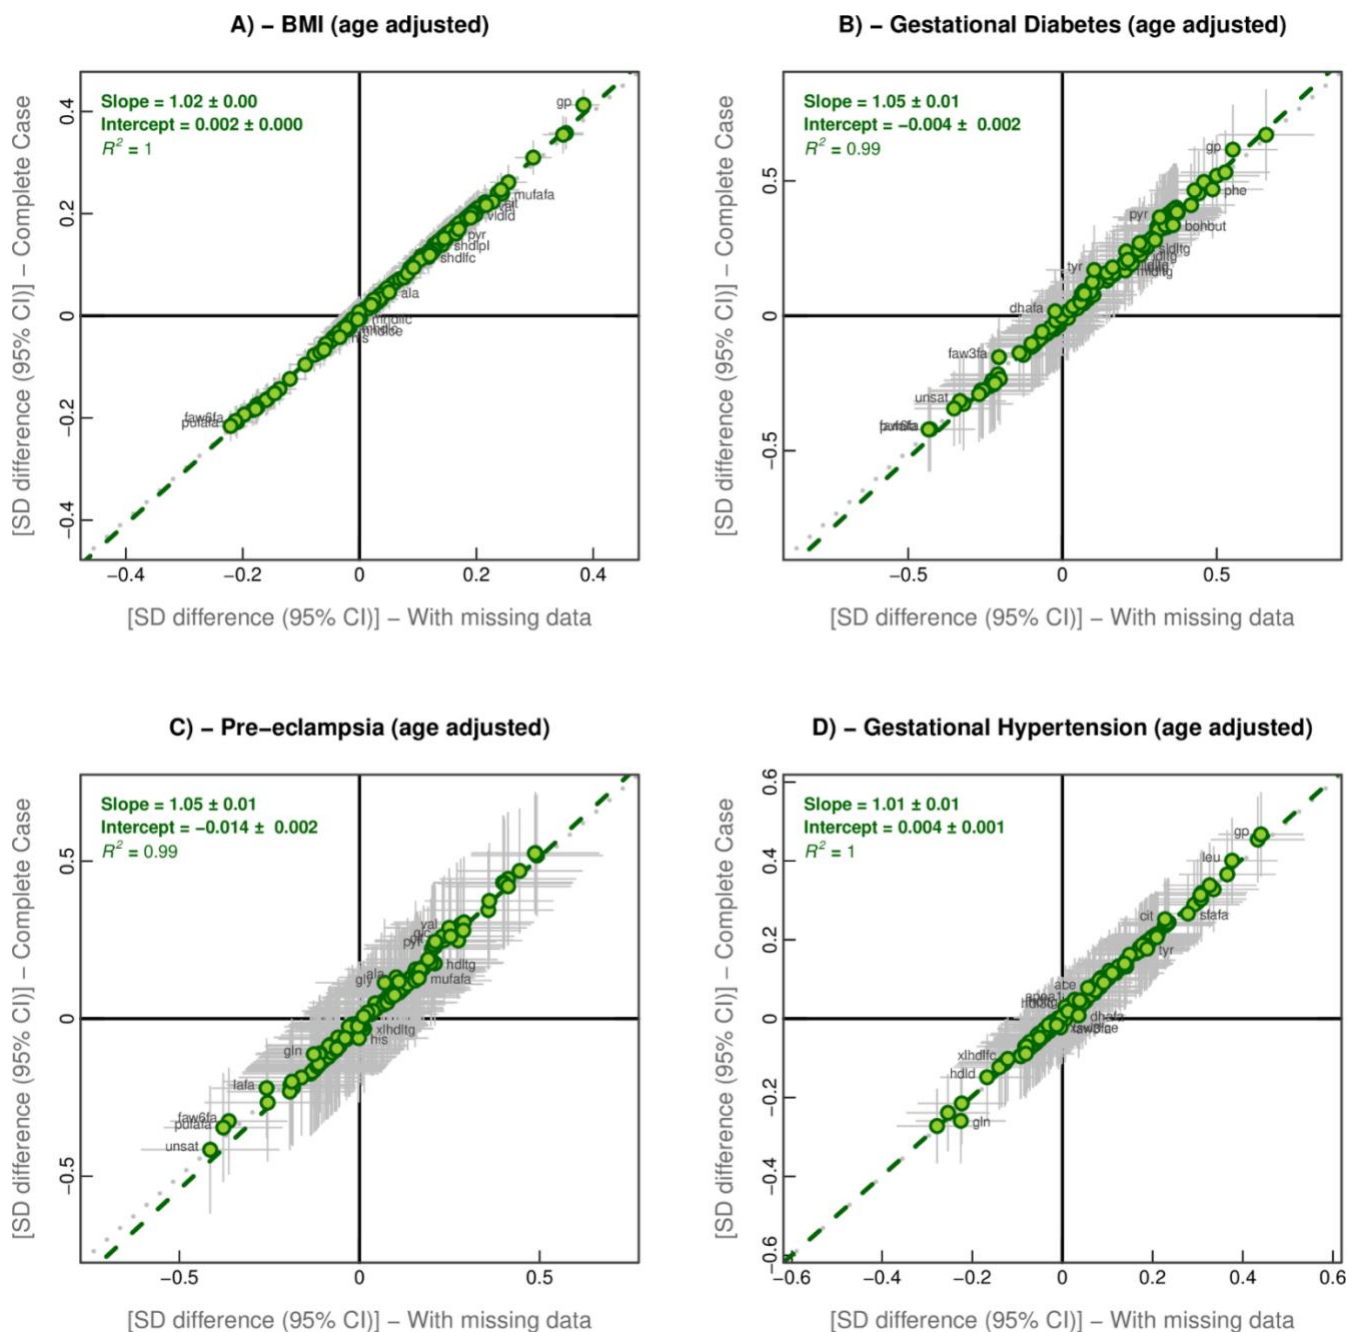

**Figure S20. Sensitivity Analysis 1: Linear fit between missing data and complete case analyses for age-adjusted models (green dashed line): maternal BMI (a), gestational diabetes (b), pre-eclampsia (c) and gestational hypertension (d) in *White European* women.** Each green dot represents a metabolic trait. The positions of the dots are determined by difference in mean maternal metabolite (in SD units) for each increase of 1-SD maternal exposure in the main analyses whereby data were not complete (x-axis) and difference in mean maternal metabolite (in SD units) for each increase in 1-SD maternal exposure in complete-case analyses (y-axis). For dichotomous exposures, the differences are in SD units between the exposures and non-exposed. Missing data is described in table 1 of the main text. The horizontal grey lines on each dot denote the confidence intervals (CI) for main analyses associations and the vertical grey lines indicate the CI for complete-case estimates. A linear fit of the overall concordance (the similarity in magnitude between complete case and non complete case associations) is shown by the green dashed line. A slope of 1 with an intercept of 0 (dashed grey line), with all green dots sitting on that line, would indicate that results had the same magnitude and direction. The proportion of variance in non complete case associations that is explained by complete case associations ( $R^2$ ) in these analyses provides a measure of goodness of linear fit, with higher values (closer to 1) indicating higher consistency between complete case.

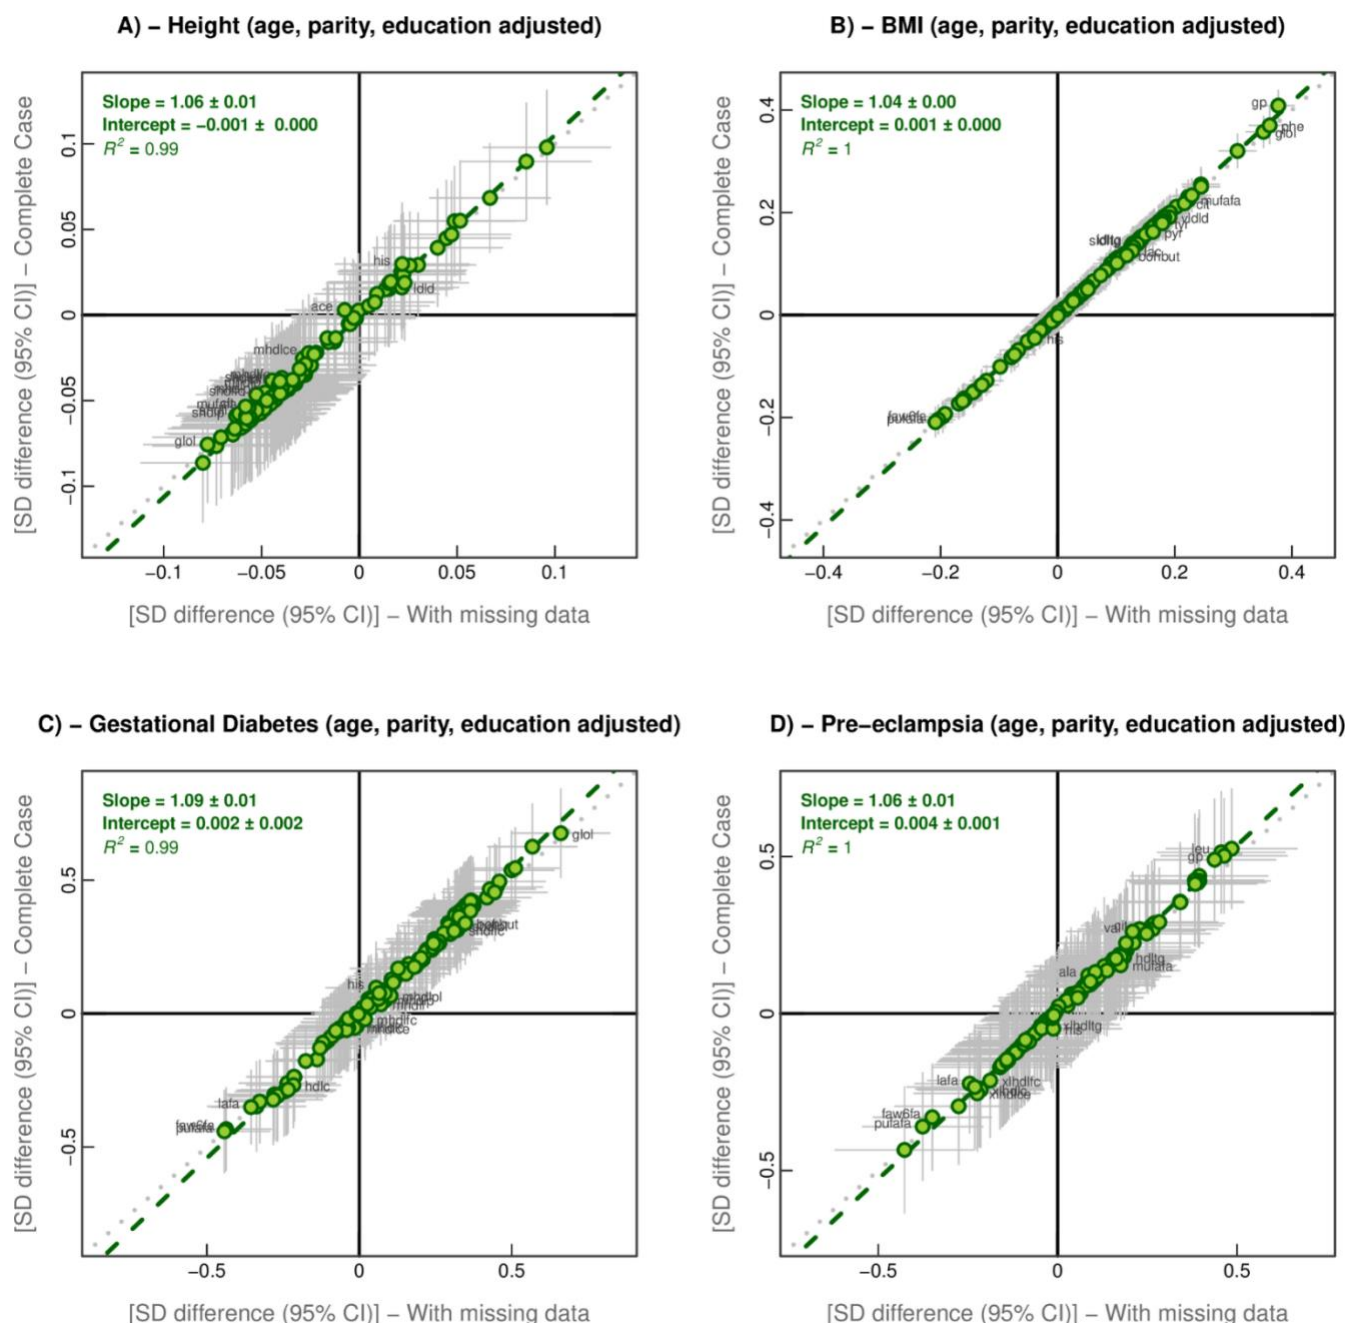

**Figure S21. Sensitivity Analysis 1: Linear fit between missing data and complete case analyses for age, parity and education-adjusted models (green dashed line): maternal height (a), BMI (b) gestational diabetes (c) and pre-eclampsia (d) in *White European* women.** Each green dot represents a metabolic trait. The positions of the dots are determined by difference in mean maternal metabolite (in SD units) for each increase of 1-SD maternal exposure in the main analyses whereby data were not complete (x-axis) and difference in mean maternal metabolite (in SD units) for each increase in 1-SD maternal exposure in complete-case analyses (y-axis). For dichotomous exposures, the differences are in SD units between the exposures and non-exposed. Missing data is described in table 1 of the main text. The horizontal grey lines on each dot denote the confidence intervals (CI) for main analyses associations and the vertical grey lines indicate the CI for complete-case estimates. A linear fit of the overall concordance (the similarity in magnitude between complete case and non complete case associations) is shown by the green dashed line. A slope of 1 with an intercept of 0 (dashed grey line), with all green dots sitting on that line, would indicate that results had the same magnitude and direction. The proportion of variance in non complete case associations that is explained by complete case associations ( $R^2$ ) in these analyses provides a measure of goodness of linear fit, with higher values (closer to 1) indicating higher consistency between complete case.

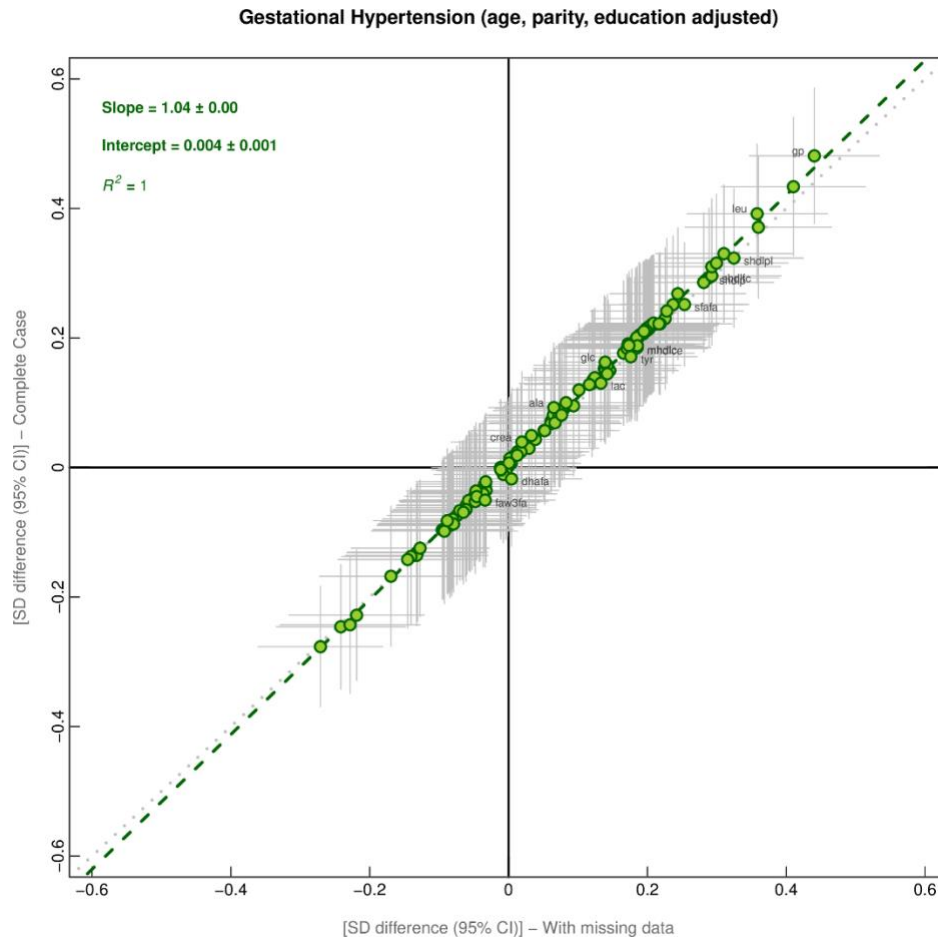

**Figure S22. Sensitivity Analysis 1: Linear fit between missing data and complete case analyses for age, parity, education and BMI-adjusted models (green dashed line) for maternal gestational hypertension in *White European women*.** Each green dot represents a metabolic trait. The positions of the dots are determined by difference in mean maternal metabolite (in SD units) for each increase of 1-SD maternal exposure in the main analyses whereby data were not complete (x-axis) and difference in mean maternal metabolite (in SD units) for each increase in 1-SD maternal exposure in complete-case analyses (y-axis). For dichotomous exposures, the differences are in SD units between the exposures and non-exposed. Missing data is described in table 1 of the main text. The horizontal grey lines on each dot denote the confidence intervals (CI) for main analyses associations and the vertical grey lines indicate the CI for complete-case estimates. A linear fit of the overall concordance (the similarity in magnitude between complete case and non complete case associations) is shown by the green dashed line. A slope of 1 with an intercept of 0 (dashed grey line), with all green dots sitting on that line, would indicate that results had the same magnitude and direction. The proportion of variance in non complete case associations that is explained by complete case associations ( $R^2$ ) in these analyses provides a measure of goodness of linear fit, with higher values (closer to 1) indicating higher consistency between complete case.

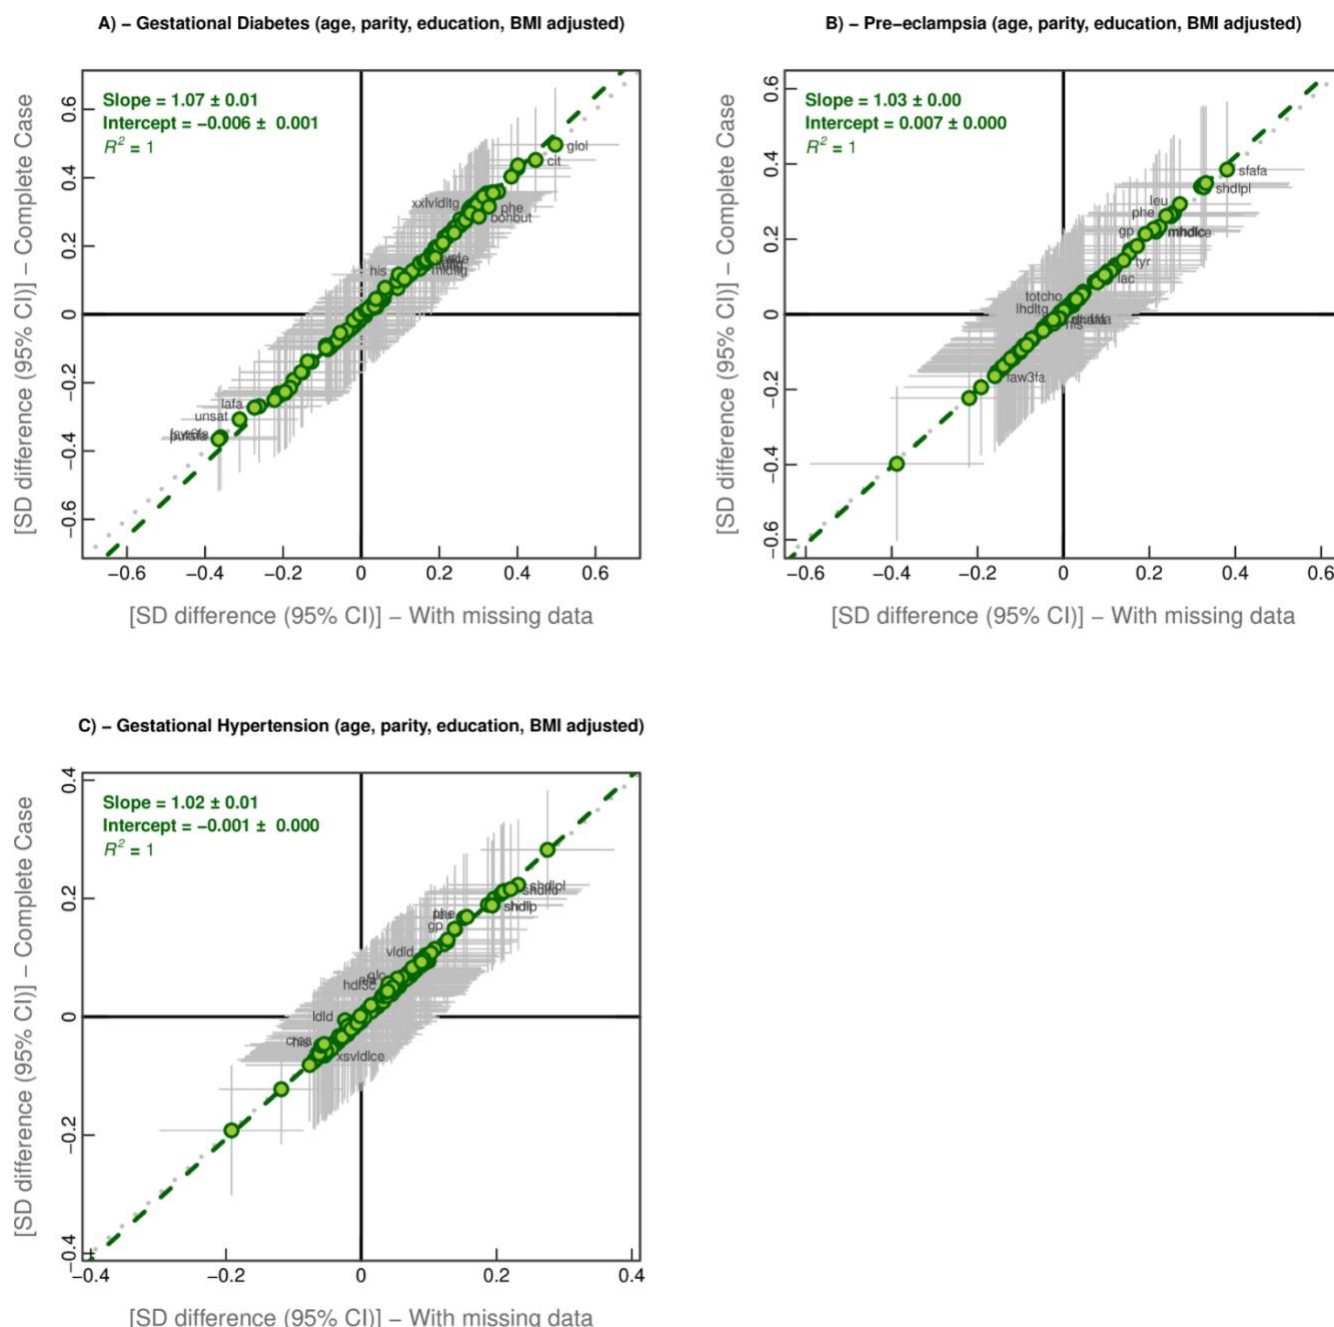

**Figure S23. Sensitivity Analysis 1: Linear fit between missing data and complete case analyses for age, parity, education and BMI-adjusted models (green dashed line): gestational diabetes (a), pre-eclampsia (b) and gestational hypertension (c) in *White European* women.** Each green dot represents a metabolic trait. The positions of the dots are determined by difference in mean maternal metabolite (in SD units) for each increase of 1-SD maternal exposure in the main analyses whereby data were not complete (x-axis) and difference in mean maternal metabolite (in SD units) for each increase in 1-SD maternal exposure in complete-case analyses (y-axis). For dichotomous exposures, the differences are in SD units between the exposures and non-exposed. Missing data is described in table 1 of the main text. The horizontal grey lines on each dot denote the confidence intervals (CI) for main analyses associations and the vertical grey lines indicate the CI for complete-case estimates. A linear fit of the overall concordance (the similarity in magnitude between complete case and non complete case associations) is shown by the green dashed line. A slope of 1 with an intercept of 0 (dashed grey line), with all green dots sitting on that line, would indicate that results had the same magnitude and direction. The proportion of variance in non complete case associations that is explained by complete case associations ( $R^2$ ) in these analyses provides a measure of goodness of linear fit, with higher values (closer to 1) indicating higher consistency between complete case.



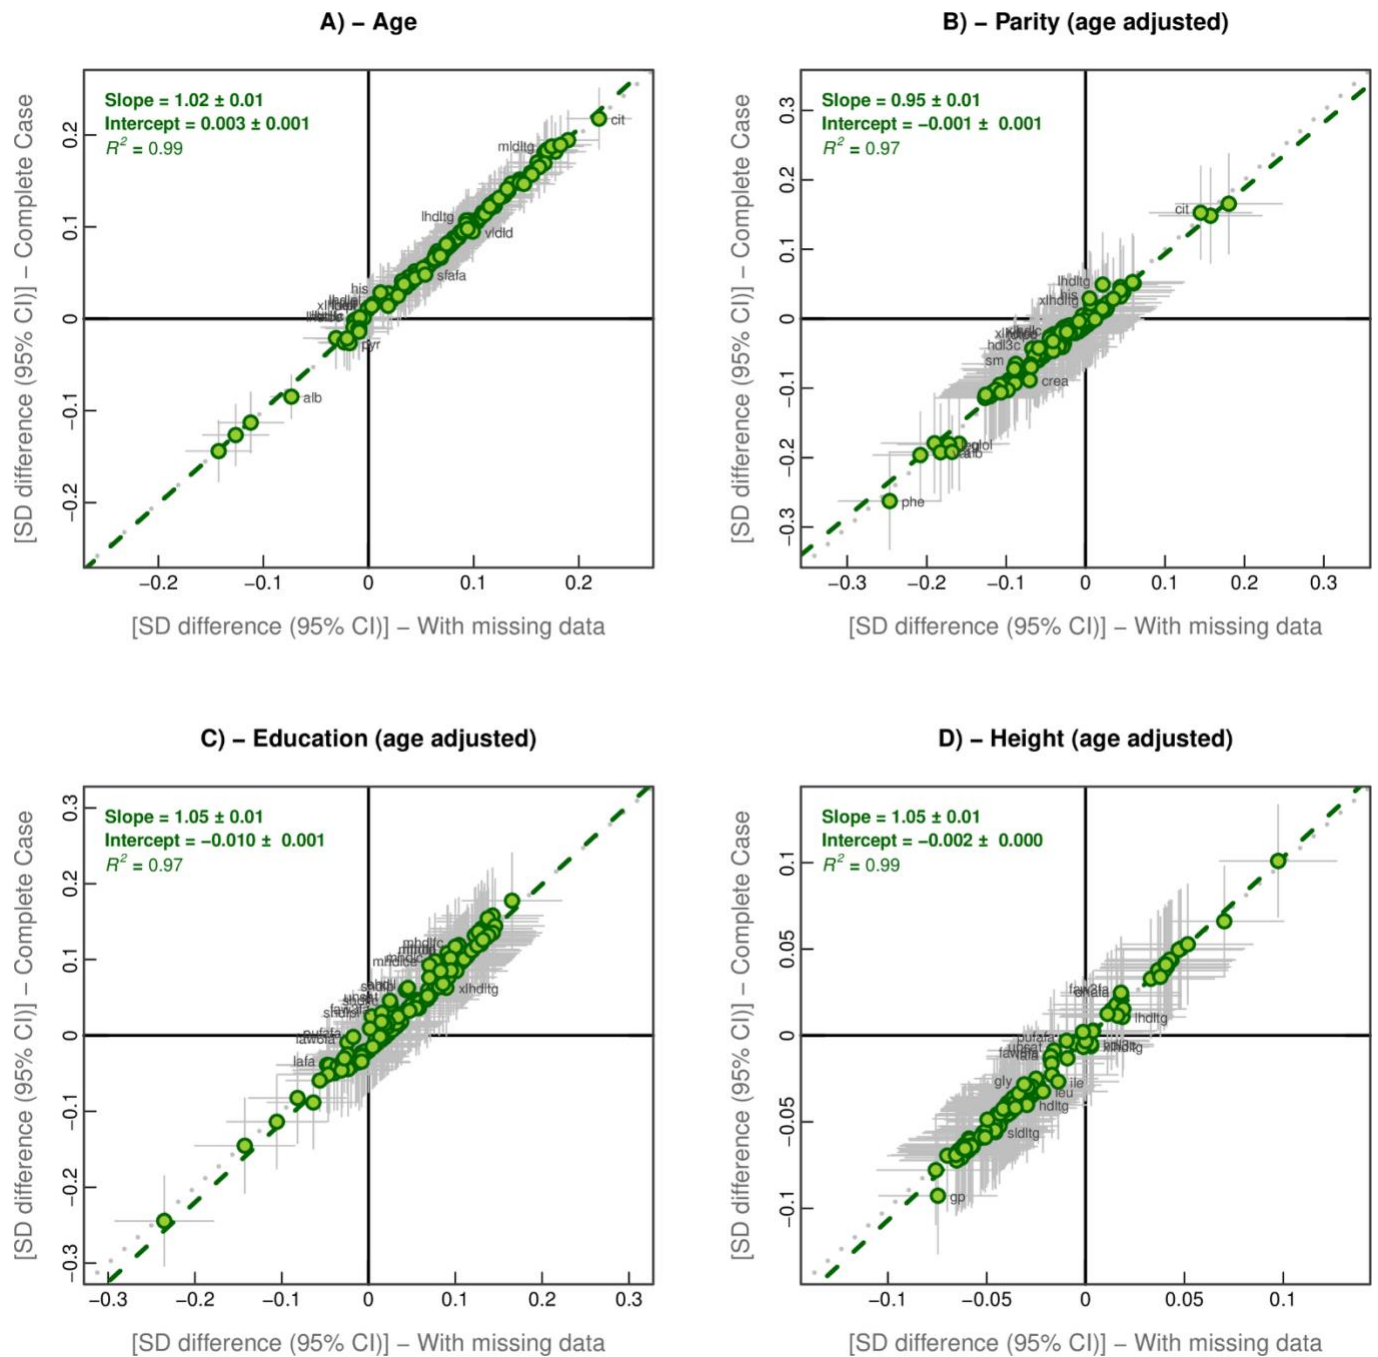

**Figure S24. Sensitivity Analysis 1: Linear fit between missing data and complete case analyses for age-adjusted models (green dashed line): maternal age (a), parity (b), education (c), and height (d) in *South Asian* women.** Each green dot represents a metabolic trait. The positions of the dots are determined by difference in mean maternal metabolite (in SD units) for each increase of 1-SD maternal exposure in the main analyses whereby data were not complete (x-axis) and difference in mean maternal metabolite (in SD units) for each increase in 1-SD maternal exposure in complete-case analyses (y-axis). For dichotomous exposures, the differences are in SD units between the exposures and non-exposed. Missing data is described in table 1 of the main text. The horizontal grey lines on each dot denote the confidence intervals (CI) for main analyses associations and the vertical grey lines indicate the CI for complete-case estimates. A linear fit of the overall concordance (the similarity in magnitude between complete case and non complete case associations) is shown by the green dashed line. A slope of 1 with an intercept of 0 (dashed grey line), with all green dots sitting on that line, would indicate that results had the same magnitude and direction. The proportion of variance in non complete case associations that is explained by complete case associations ( $R^2$ ) in these analyses provides a measure of goodness of linear fit, with higher values (closer to 1) indicating higher consistency between complete case.

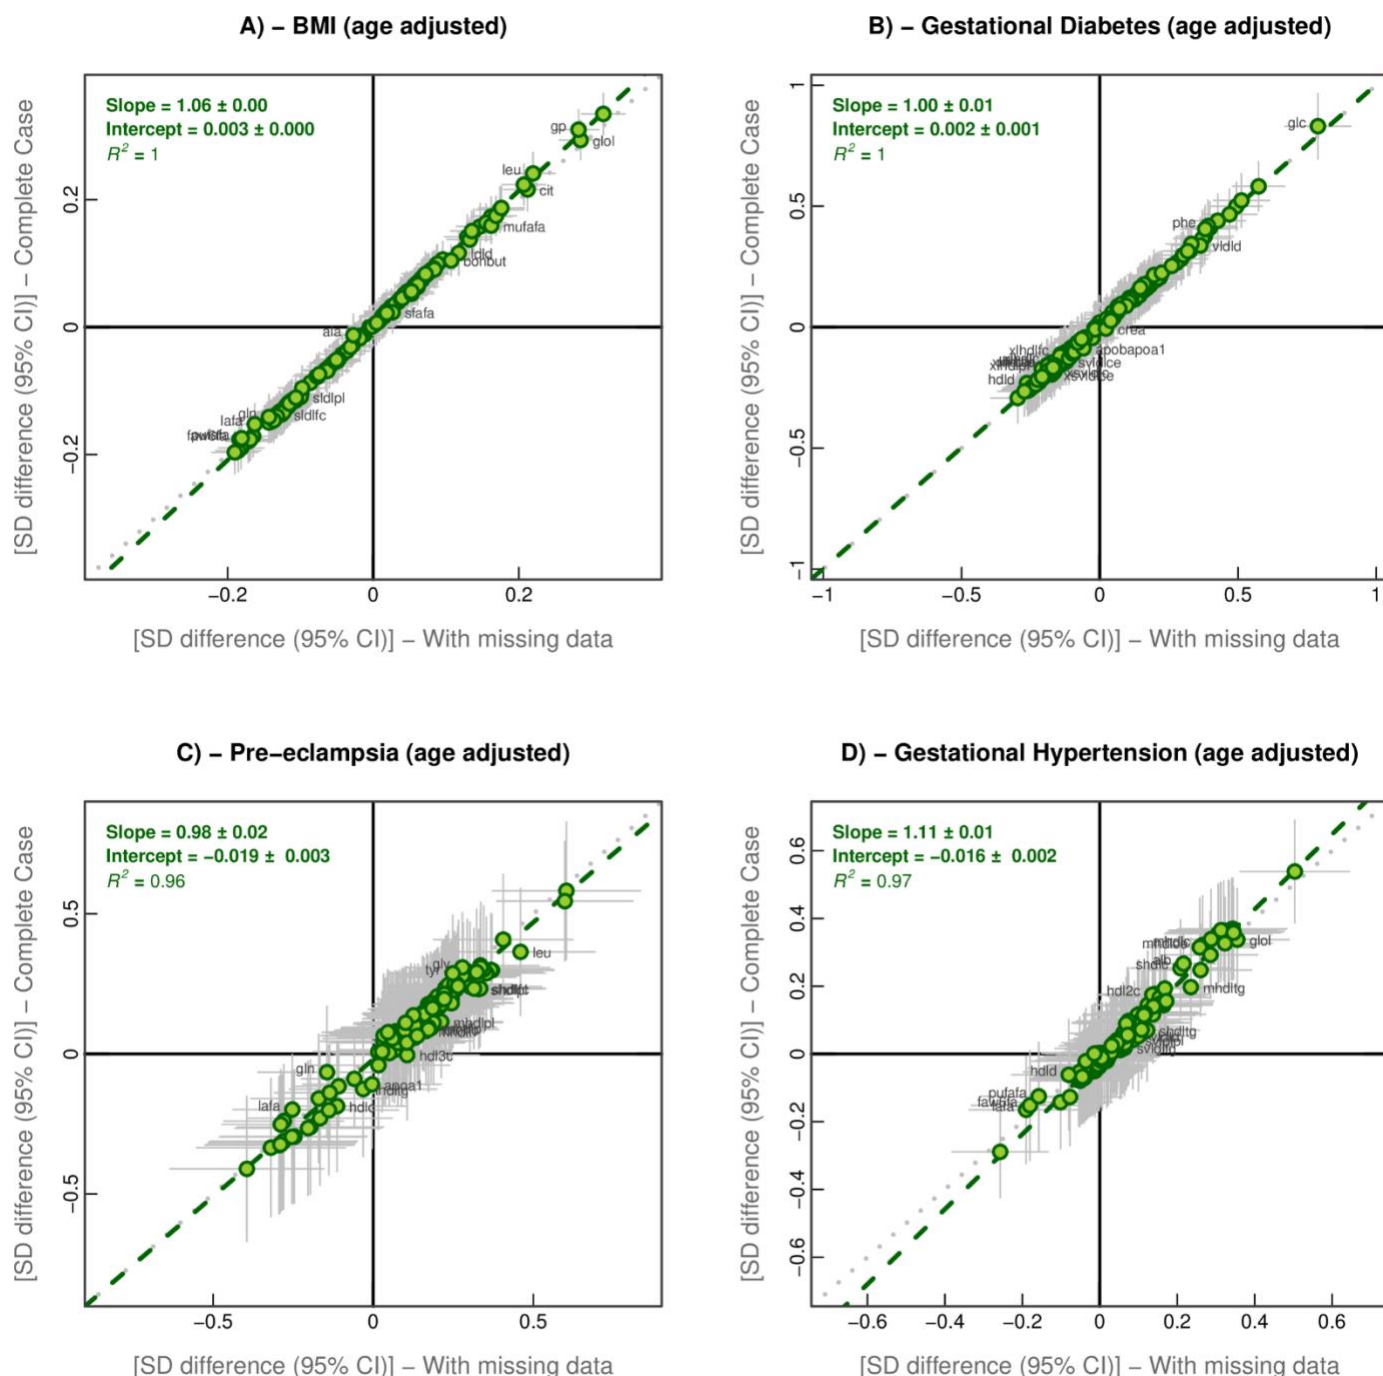

**Figure S25. Sensitivity Analysis 1: Linear fit between missing data and complete case analyses for age-adjusted models (green dashed line): maternal BMI (a), gestational diabetes (b), pre-eclampsia (c) and gestational hypertension (d) in *South Asian* women.** Each green dot represents a metabolic trait. The positions of the dots are determined by difference in mean maternal metabolite (in SD units) for each increase of 1-SD maternal exposure in the main analyses whereby data were not complete (x-axis) and difference in mean maternal metabolite (in SD units) for each increase in 1-SD maternal exposure in complete-case analyses (y-axis). For dichotomous exposures, the differences are in SD units between the exposures and non-exposed. Missing data is described in table 1 of the main text. The horizontal grey lines on each dot denote the confidence intervals (CI) for main analyses associations and the vertical grey lines indicate the CI for complete-case estimates. A linear fit of the overall concordance (the similarity in magnitude between complete case and non complete case associations) is shown by the green dashed line. A slope of 1 with an intercept of 0 (dashed grey line), with all green dots sitting on that line, would indicate that results had the same magnitude and direction. The proportion of variance in non complete case associations that is explained by complete case associations ( $R^2$ ) in these analyses provides a measure of goodness of linear fit, with higher values (closer to 1) indicating higher consistency between complete case.

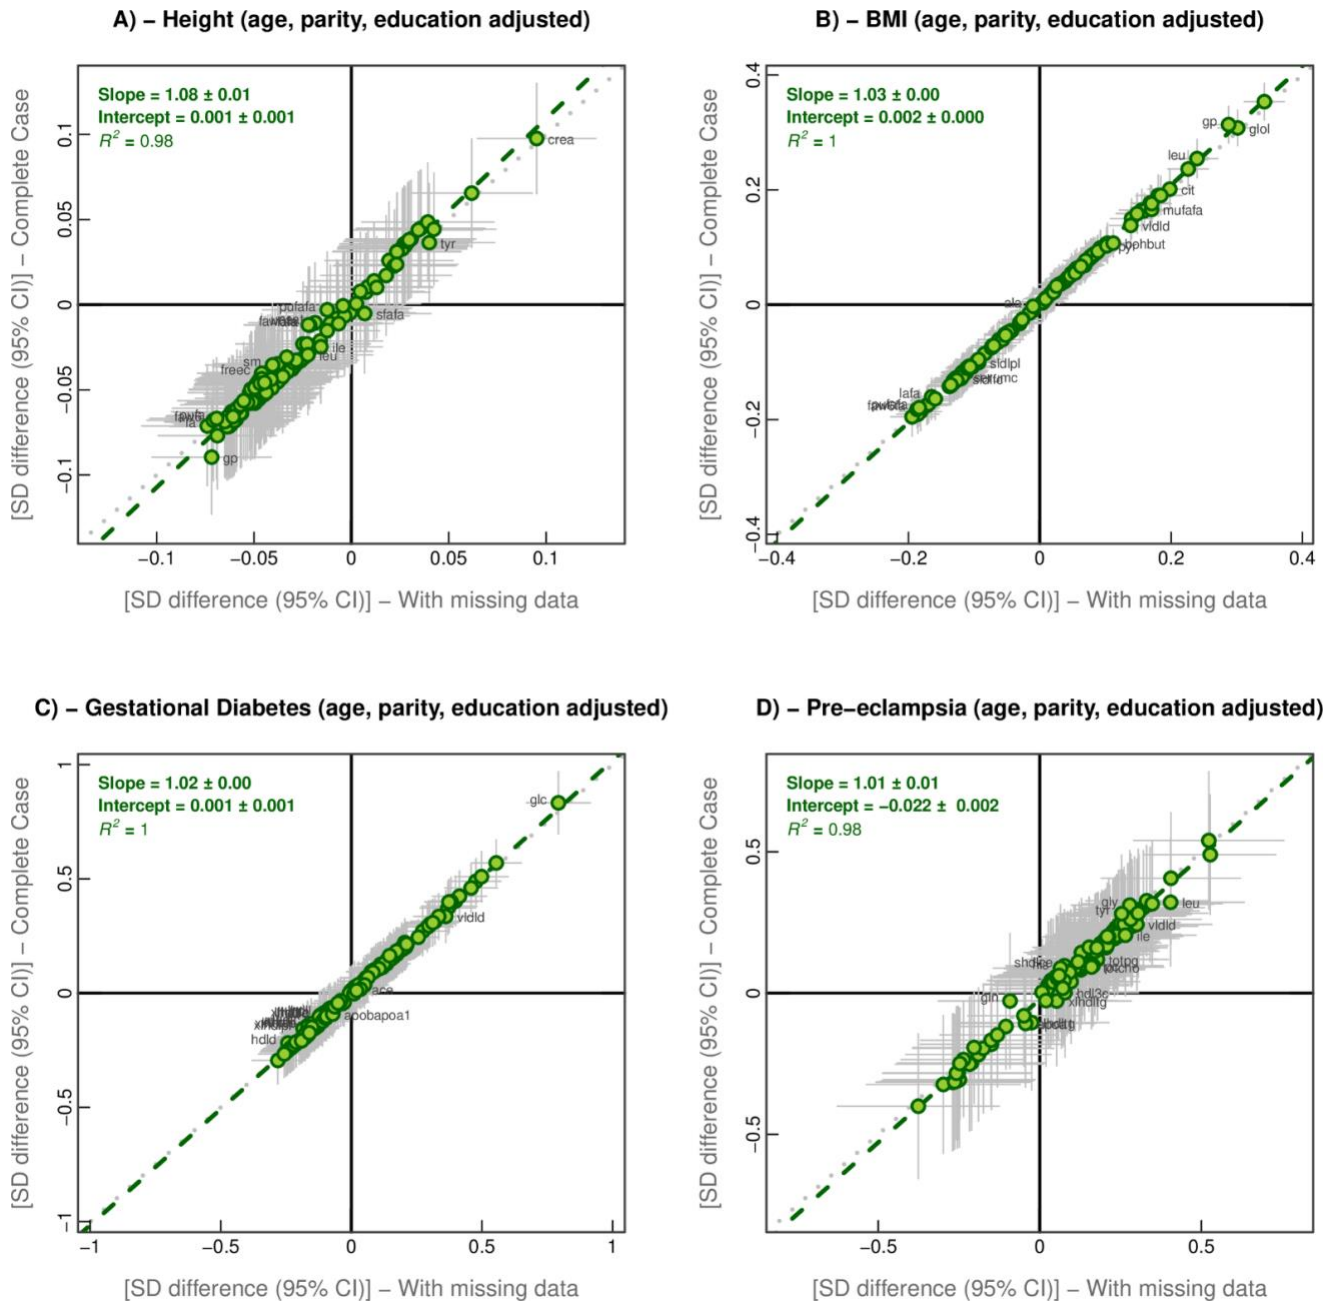

**Figure S26. Sensitivity Analysis 1: Linear fit between missing data and complete case analyses for age, parity and education-adjusted models (green dashed line): maternal height (a), BMI (b) gestational diabetes (c) and pre-eclampsia (d) in *South Asian* women.** Each green dot represents a metabolic trait. The positions of the dots are determined by difference in mean maternal metabolite (in SD units) for each increase of 1-SD maternal exposure in the main analyses whereby data were not complete (x-axis) and difference in mean maternal metabolite (in SD units) for each increase in 1-SD maternal exposure in complete-case analyses (y-axis). For dichotomous exposures, the differences are in SD units between the exposures and non-exposed. Missing data is described in table 1 of the main text. The horizontal grey lines on each dot denote the confidence intervals (CI) for main analyses associations and the vertical grey lines indicate the CI for complete-case estimates. A linear fit of the overall concordance (the similarity in magnitude between complete case and non complete case associations) is shown by the green dashed line. A slope of 1 with an intercept of 0 (dashed grey line), with all green dots sitting on that line, would indicate that results had the same magnitude and direction. The proportion of variance in non complete case associations that is explained by complete case associations ( $R^2$ ) in these analyses provides a measure of goodness of linear fit, with higher values (closer to 1) indicating higher consistency between complete case.



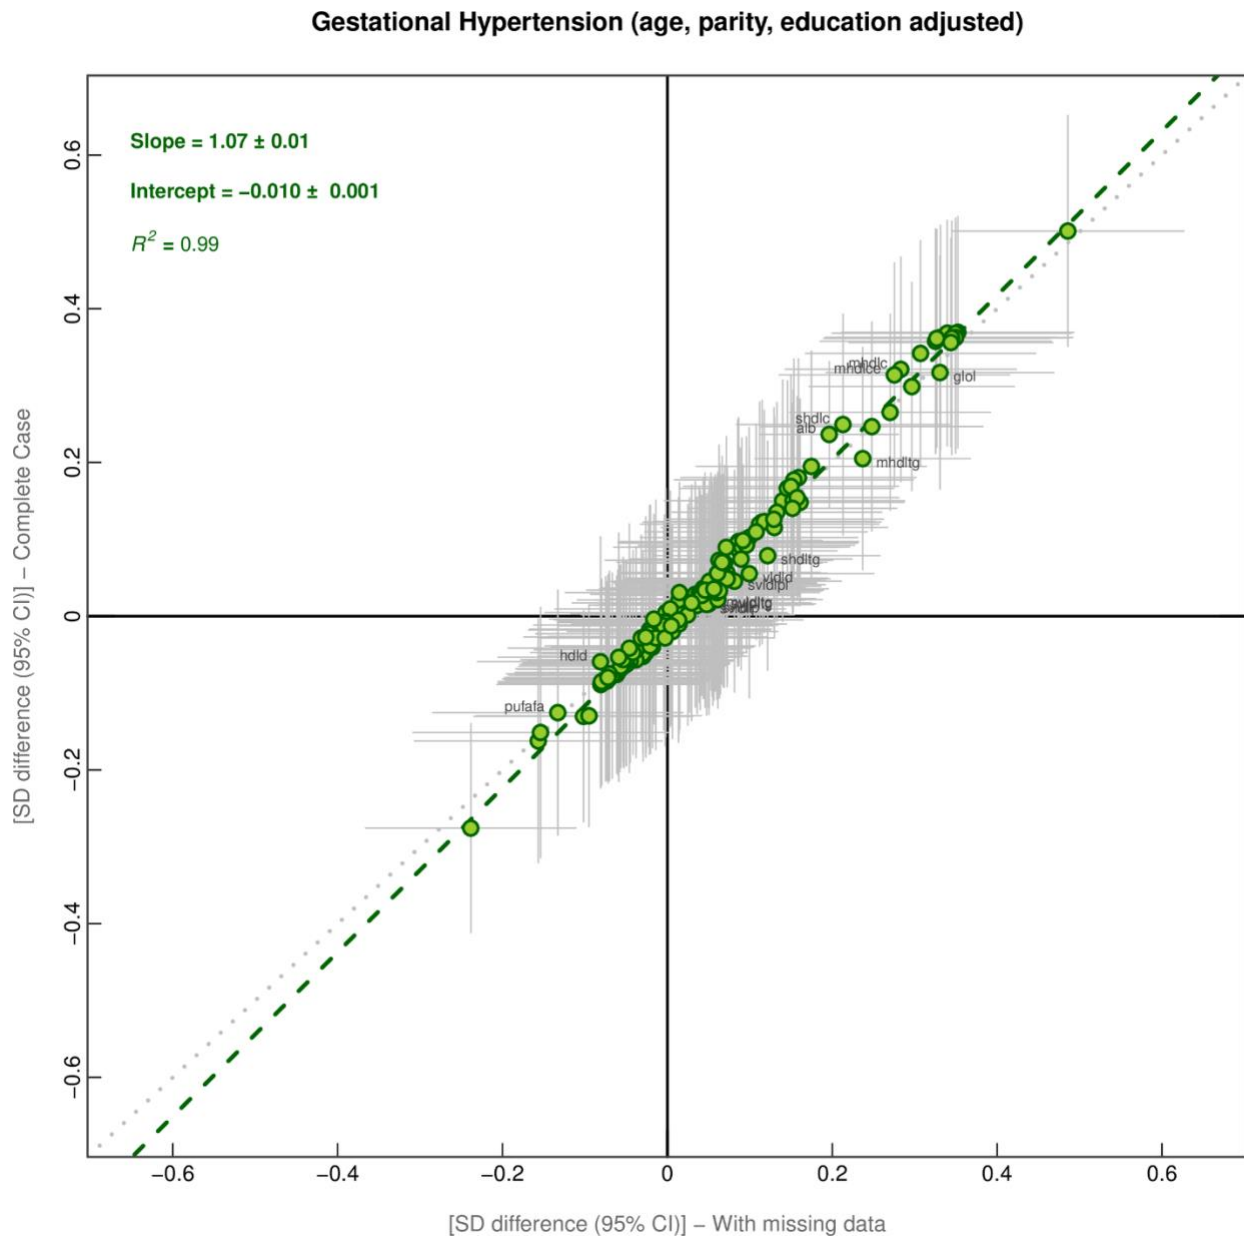

**Figure S27. Sensitivity Analysis 1: Linear fit between missing data and complete case analyses for age, parity, education and BMI-adjusted models (green dashed line) for maternal gestational hypertension in *South Asian* women.**

Each green dot represents a metabolic trait. The positions of the dots are determined by difference in mean maternal metabolite (in SD units) for each increase of 1-SD maternal exposure in the main analyses whereby data were not complete (x-axis) and difference in mean maternal metabolite (in SD units) for each increase in 1-SD maternal exposure in complete-case analyses (y-axis). For dichotomous exposures, the differences are in SD units between the exposures and non-exposed. Missing data is described in table 1 of the main text. The horizontal grey lines on each dot denote the confidence intervals (CI) for main analyses associations and the vertical grey lines indicate the CI for complete-case estimates. A linear fit of the overall concordance (the similarity in magnitude between complete case and non complete case associations) is shown by the green dashed line. A slope of 1 with an intercept of 0 (dashed grey line), with all green dots sitting on that line, would indicate that results had the same magnitude and direction. The proportion of variance in non complete case associations that is explained by complete case associations ( $R^2$ ) in these analyses provides a measure of goodness of linear fit, with higher values (closer to 1) indicating higher consistency between complete case.

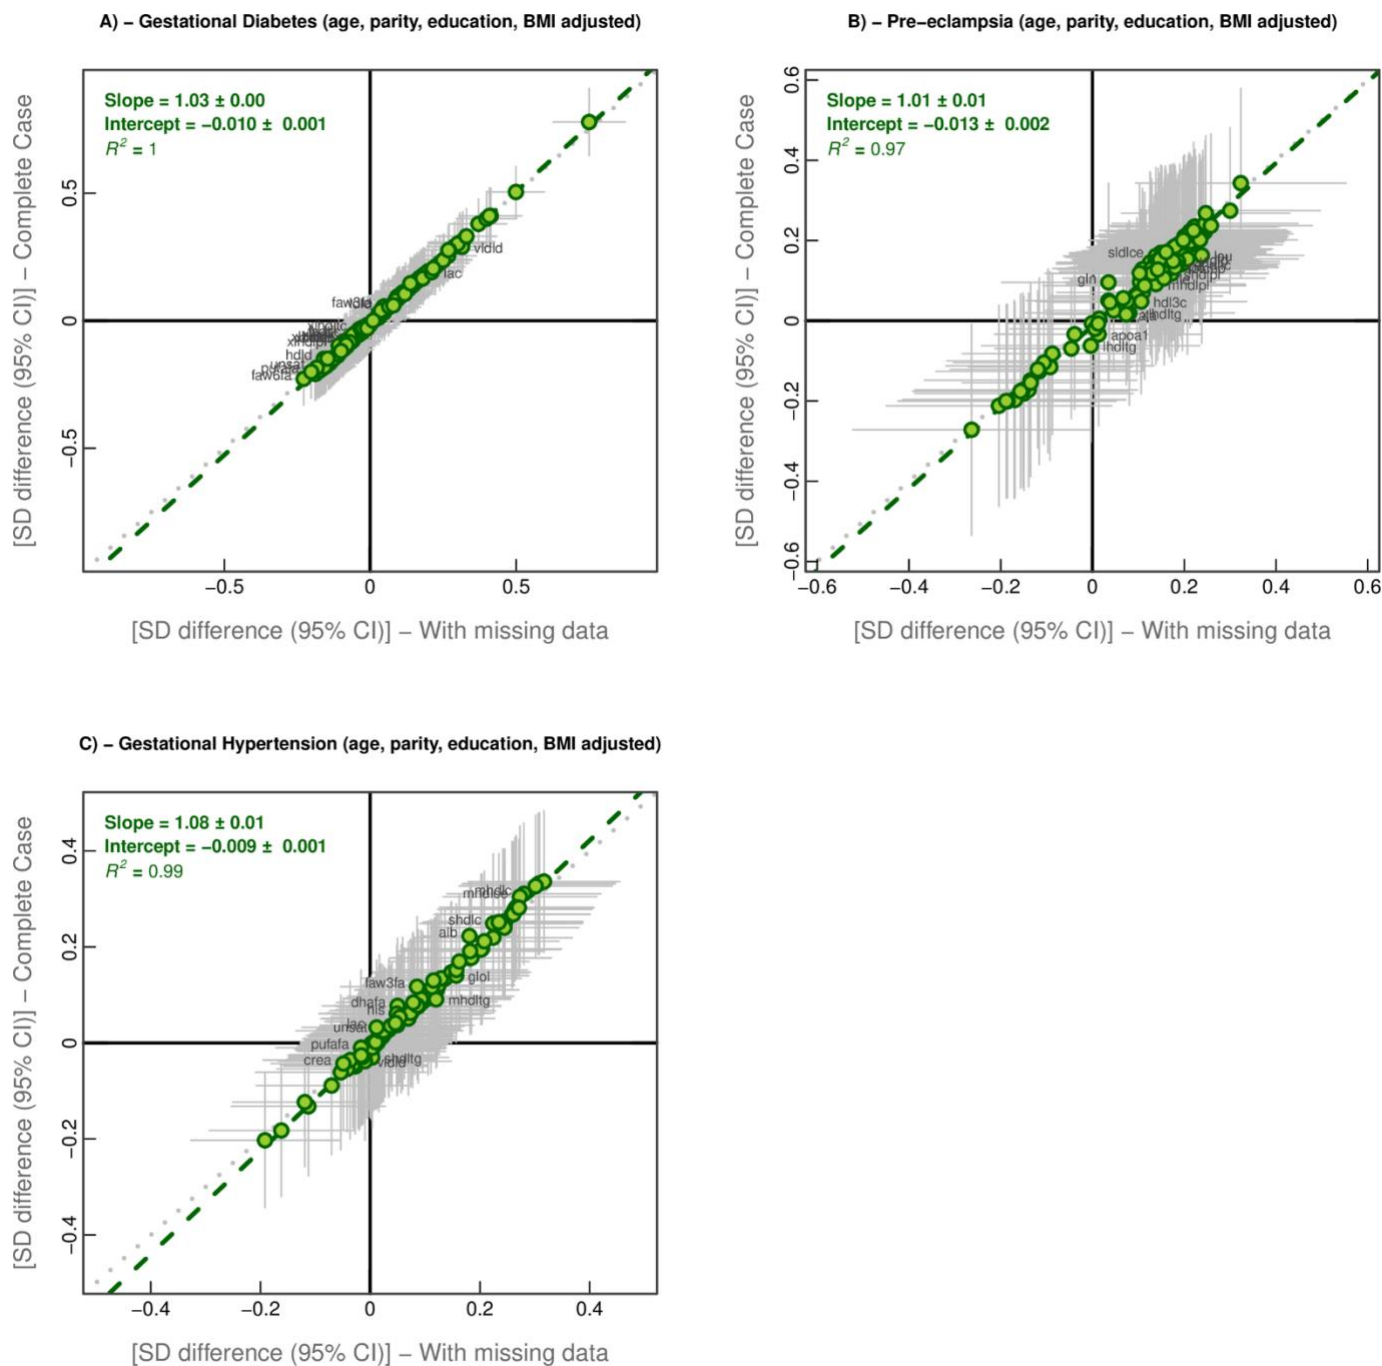

**Figure S28. Sensitivity Analysis 1: Linear fit between missing data and complete case analyses for age, parity, education and BMI-adjusted models (green dashed line): gestational diabetes (a), pre-eclampsia (b) and gestational hypertension (c) in *South Asian* women.** Each green dot represents a metabolic trait. The positions of the dots are determined by difference in mean maternal metabolite (in SD units) for each increase of 1-SD maternal exposure in the main analyses whereby data were not complete (x-axis) and difference in mean maternal metabolite (in SD units) for each increase in 1-SD maternal exposure in complete-case analyses (y-axis). For dichotomous exposures, the differences are in SD units between the exposures and non-exposed. Missing data is described in table 1 of the main text. The horizontal grey lines on each dot denote the confidence intervals (CI) for main analyses associations and the vertical grey lines indicate the CI for complete-case estimates. A linear fit of the overall concordance (the similarity in magnitude between complete case and non complete case associations) is shown by the green dashed line. A slope of 1 with an intercept of 0 (dashed grey line), with all green dots sitting on that line, would indicate that results had the same magnitude and direction. The proportion of variance in non complete case associations that is explained by complete case associations ( $R^2$ ) in these analyses provides a measure of goodness of linear fit, with higher values (closer to 1) indicating higher consistency between complete case.

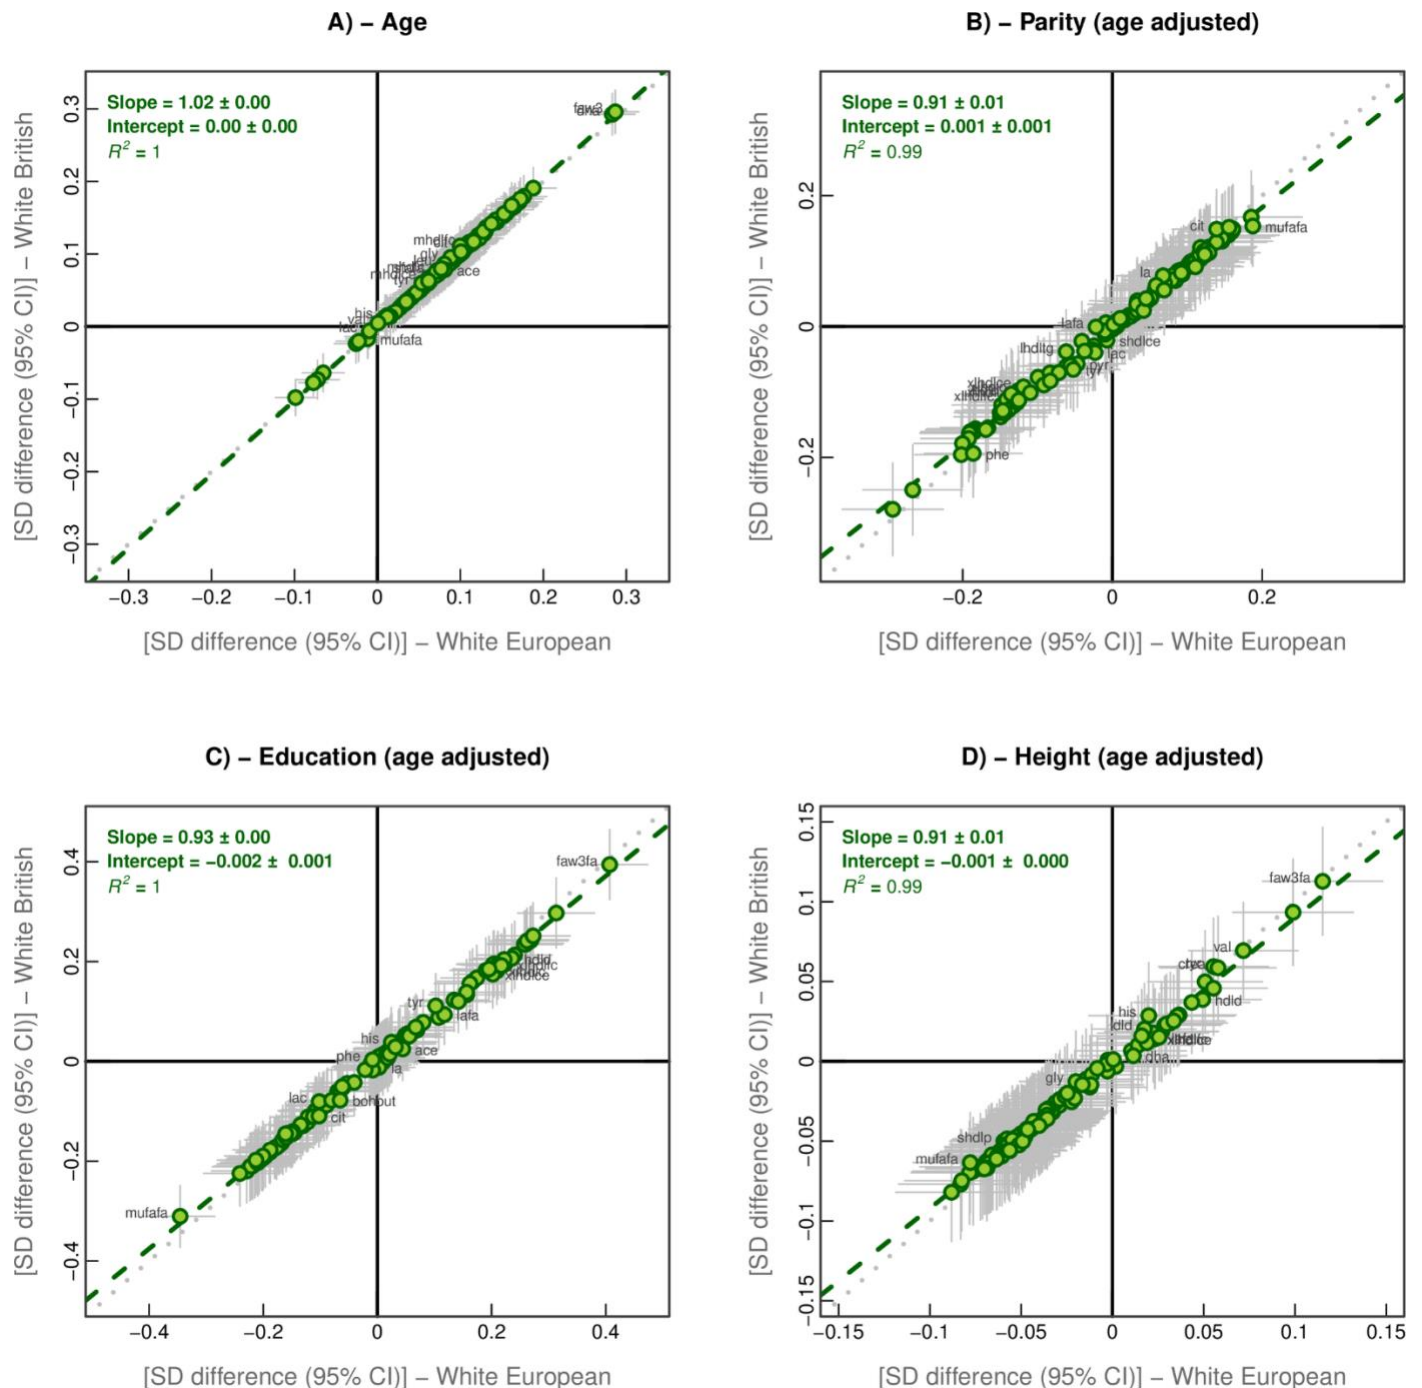

**Figure S29. Sensitivity Analysis 2: Linear fit between *White European* and *White British* age-adjusted models (green dashed line) for maternal age (a), parity (b), education (c), and height (d).** Each green dot represents a metabolic trait. The positions of the dots are determined by difference in mean maternal metabolite (in SD units) for each increase of 1-SD maternal exposure in the main analyses ethnic group (x-axis) and difference in mean maternal metabolite (in SD units) for each increase in 1-SD maternal exposure in the sensitivity analysis ethnic group (y-axis). For dichotomous exposures, the differences are in SD units between the exposures and non-exposed. The horizontal grey lines on each dot denote the confidence intervals (CI) for main analyses associations and the vertical grey lines indicate the CI for sensitivity analysis estimates. A linear fit of the overall concordance (the similarity in magnitude between the two associations) is shown by the green dashed line. A slope of 1 with an intercept of 0 (dashed grey line), with all green dots sitting on that line, would indicate that results had the same magnitude and direction. The proportion of variance in main analysis associations that is explained by sensitivity ethnic group associations ( $R^2$ ) in these analyses provides a measure of goodness of linear fit, with higher values (closer to 1) indicating higher consistency.

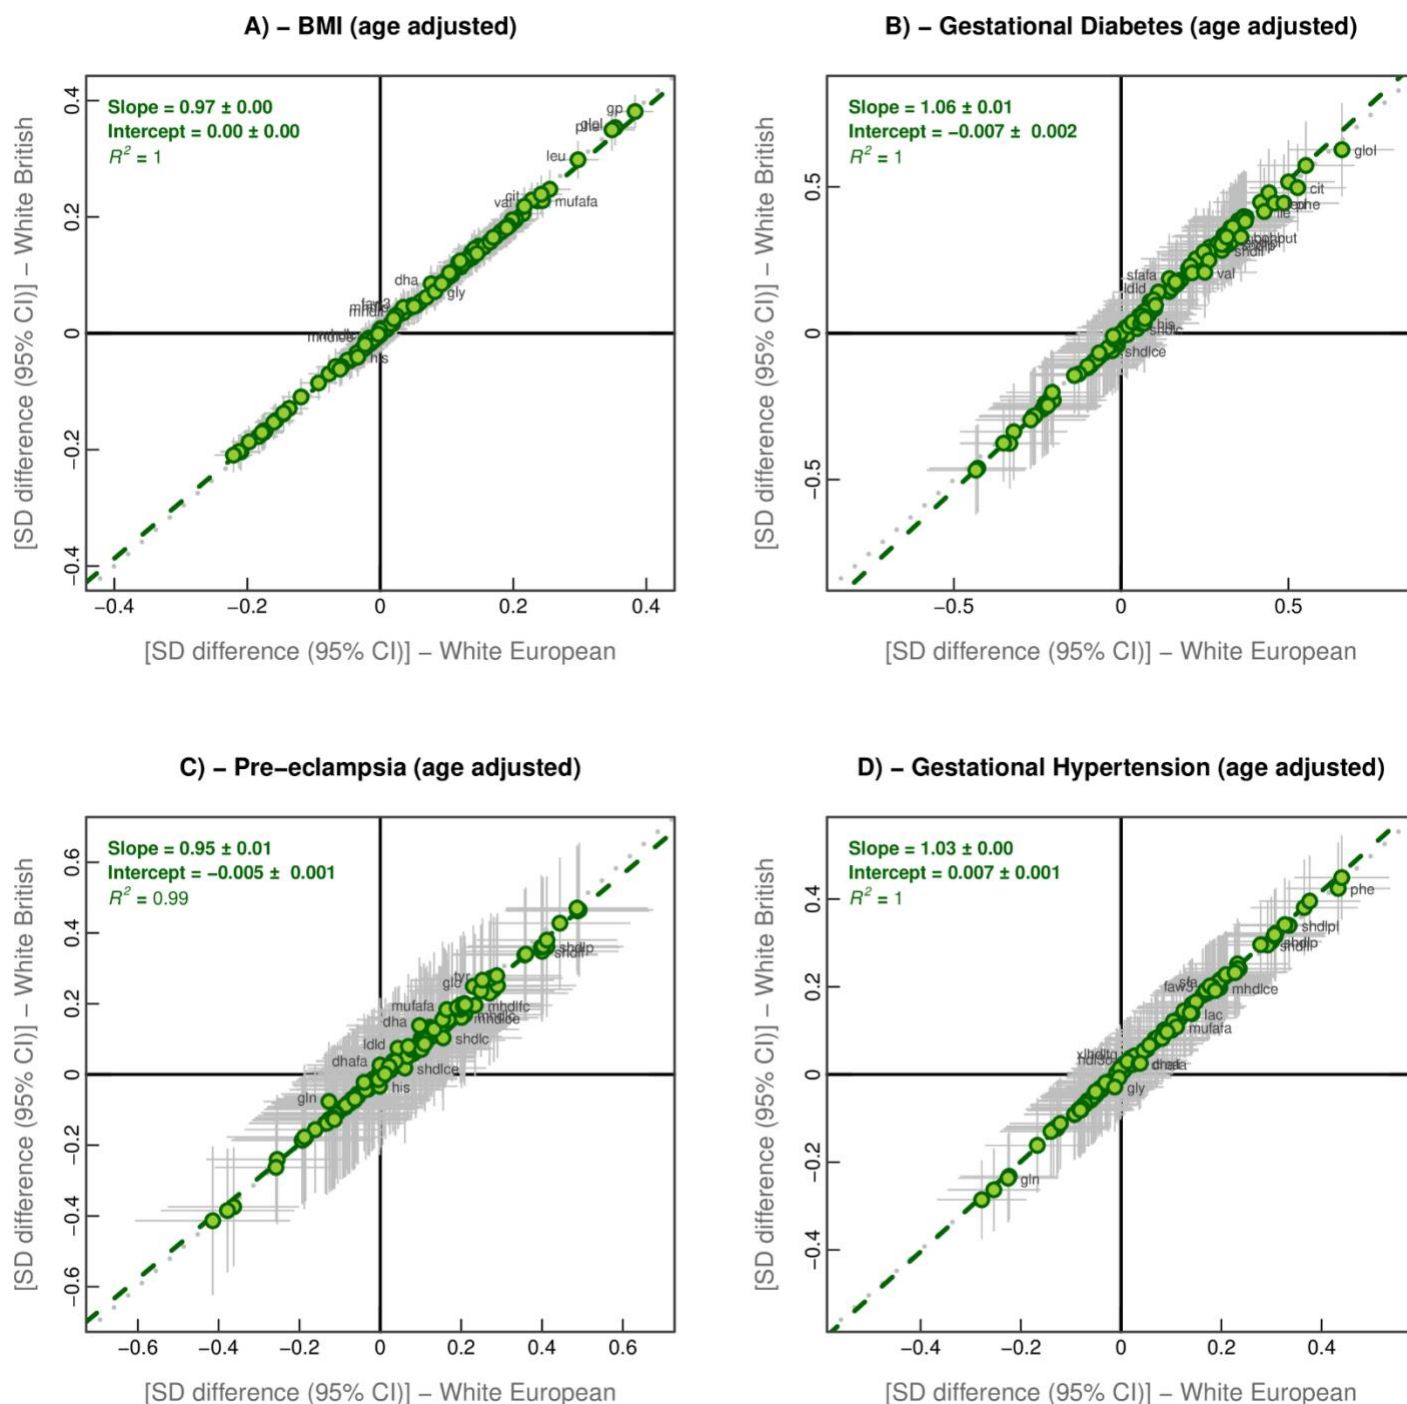

**Figure S30. Sensitivity Analysis 2: Linear fit between *White European* and *White British* age-adjusted models (green dashed line) for maternal BMI (a), gestational diabetes (b), pre-eclampsia (c) and gestational hypertension (d).** Each green dot represents a metabolic trait. The positions of the dots are determined by difference in mean maternal metabolite (in SD units) for each increase of 1-SD maternal exposure in the main analyses ethnic group (x-axis) and difference in mean maternal metabolite (in SD units) for each increase in 1-SD maternal exposure in the sensitivity analysis ethnic group (y-axis). For dichotomous exposures, the differences are in SD units between the exposures and non-exposed. The horizontal grey lines on each dot denote the confidence intervals (CI) for main analyses associations and the vertical grey lines indicate the CI for sensitivity analysis estimates. A linear fit of the overall concordance (the similarity in magnitude between the two associations) is shown by the green dashed line. A slope of 1 with an intercept of 0 (dashed grey line), with all green dots sitting on that line, would indicate that results had the same magnitude and direction. The proportion of variance in main analysis associations that is explained by sensitivity ethnic group associations ( $R^2$ ) in these analyses provides a measure of goodness of linear fit, with higher values (closer to 1) indicating higher consistency.

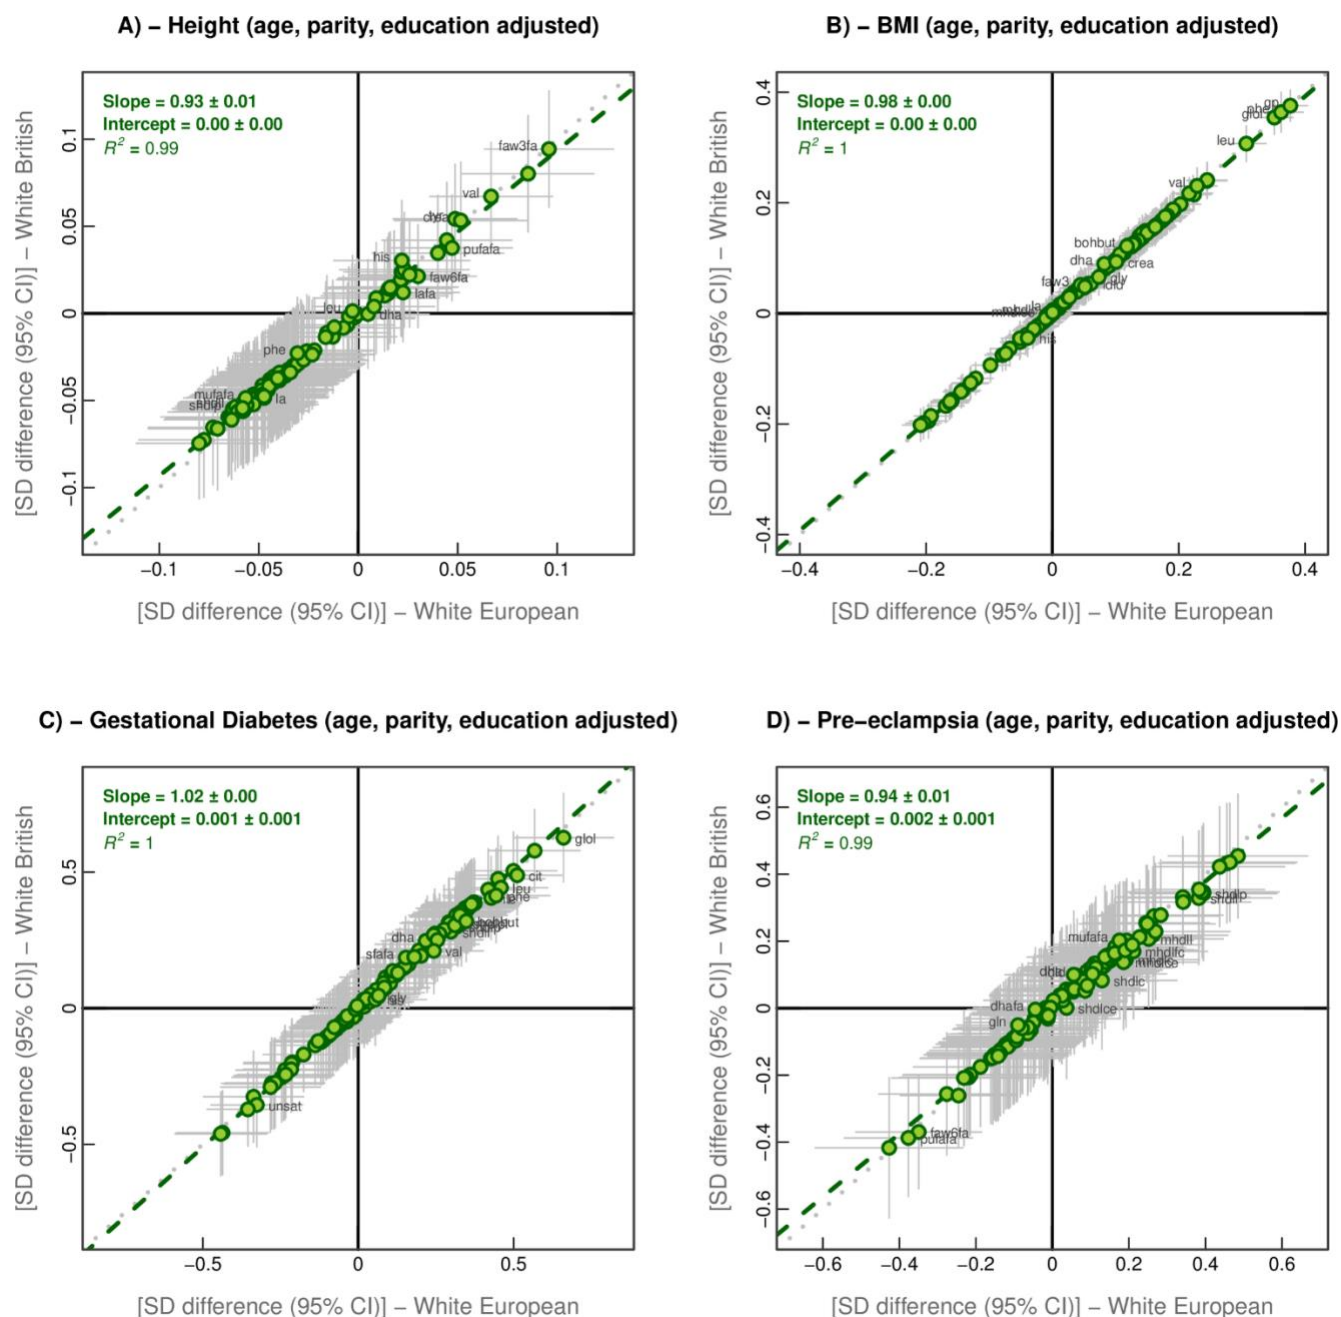

**Figure S31. Sensitivity Analysis 2: Linear fit between White European and White British age, parity and education-adjusted models (green dashed line) for maternal height (a), BMI (b) gestational diabetes (c) and pre-eclampsia (d).** Each green dot represents a metabolic trait. The positions of the dots are determined by difference in mean maternal metabolite (in SD units) for each increase of 1-SD maternal exposure in the main analyses ethnic group (x-axis) and difference in mean maternal metabolite (in SD units) for each increase in 1-SD maternal exposure in the sensitivity analysis ethnic group (y-axis). For dichotomous exposures, the differences are in SD units between the exposures and non-exposed. The horizontal grey lines on each dot denote the confidence intervals (CI) for main analyses associations and the vertical grey lines indicate the CI for sensitivity analysis estimates. A linear fit of the overall concordance (the similarity in magnitude between the two associations) is shown by the green dashed line. A slope of 1 with an intercept of 0 (dashed grey line), with all green dots sitting on that line, would indicate that results had the same magnitude and direction. The proportion of variance in main analysis associations that is explained by sensitivity ethnic group associations ( $R^2$ ) in these analyses provides a measure of goodness of linear fit, with higher values (closer to 1) indicating higher consistency.



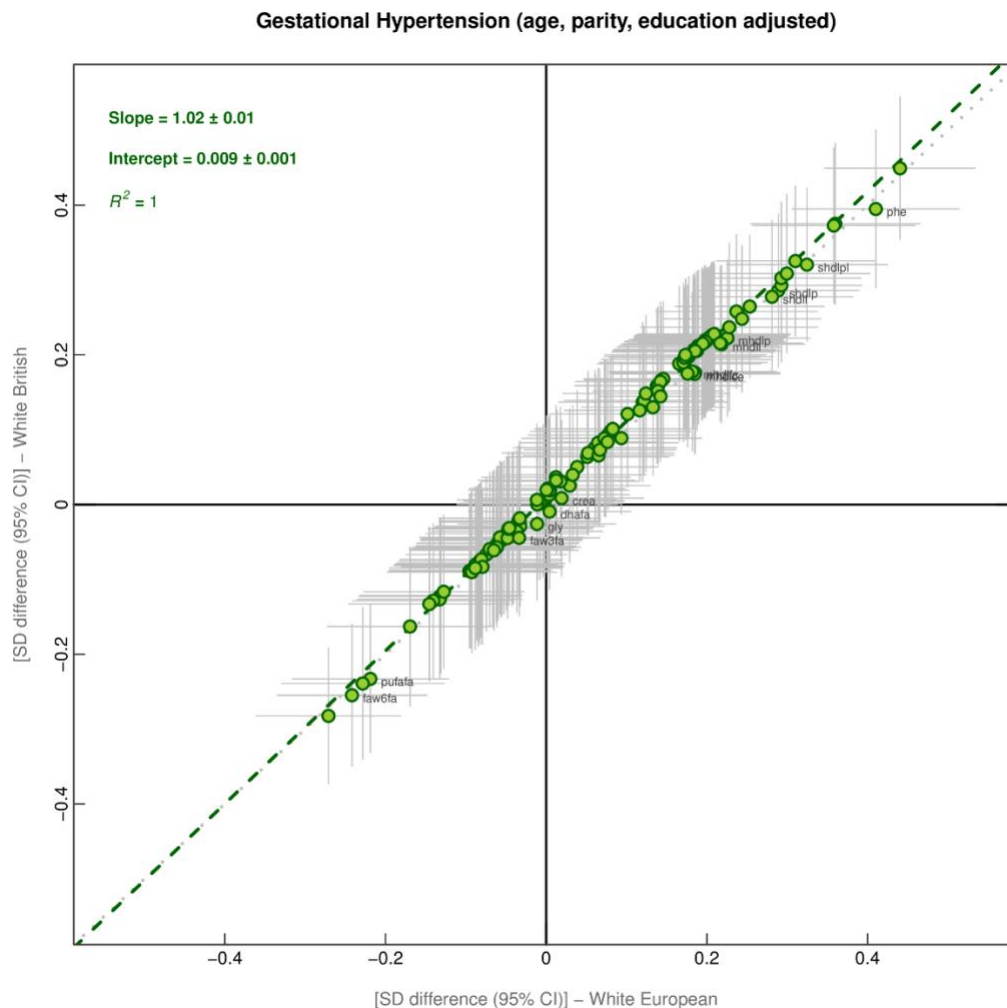

**Figure S32. Sensitivity Analysis 2: Linear fit between White European and White British age, parity, education-adjusted models (green dashed line) for maternal gestational hypertension.** Each green dot represents a metabolic trait. The positions of the dots are determined by difference in mean maternal metabolite (in SD units) for each increase of 1-SD maternal exposure in the main analyses ethnic group (x-axis) and difference in mean maternal metabolite (in SD units) for each increase in 1-SD maternal exposure in the sensitivity analysis ethnic group (y-axis). For dichotomous exposures, the differences are in SD units between the exposures and non-exposed. The horizontal grey lines on each dot denote the confidence intervals (CI) for main analyses associations and the vertical grey lines indicate the CI for sensitivity analysis estimates. A linear fit of the overall concordance (the similarity in magnitude between the two associations) is shown by the green dashed line. A slope of 1 with an intercept of 0 (dashed grey line), with all green dots sitting on that line, would indicate that results had the same magnitude and direction. The proportion of variance in main analysis associations that is explained by sensitivity ethnic group associations ( $R^2$ ) in these analyses provides a measure of goodness of linear fit, with higher values (closer to 1) indicating higher consistency.

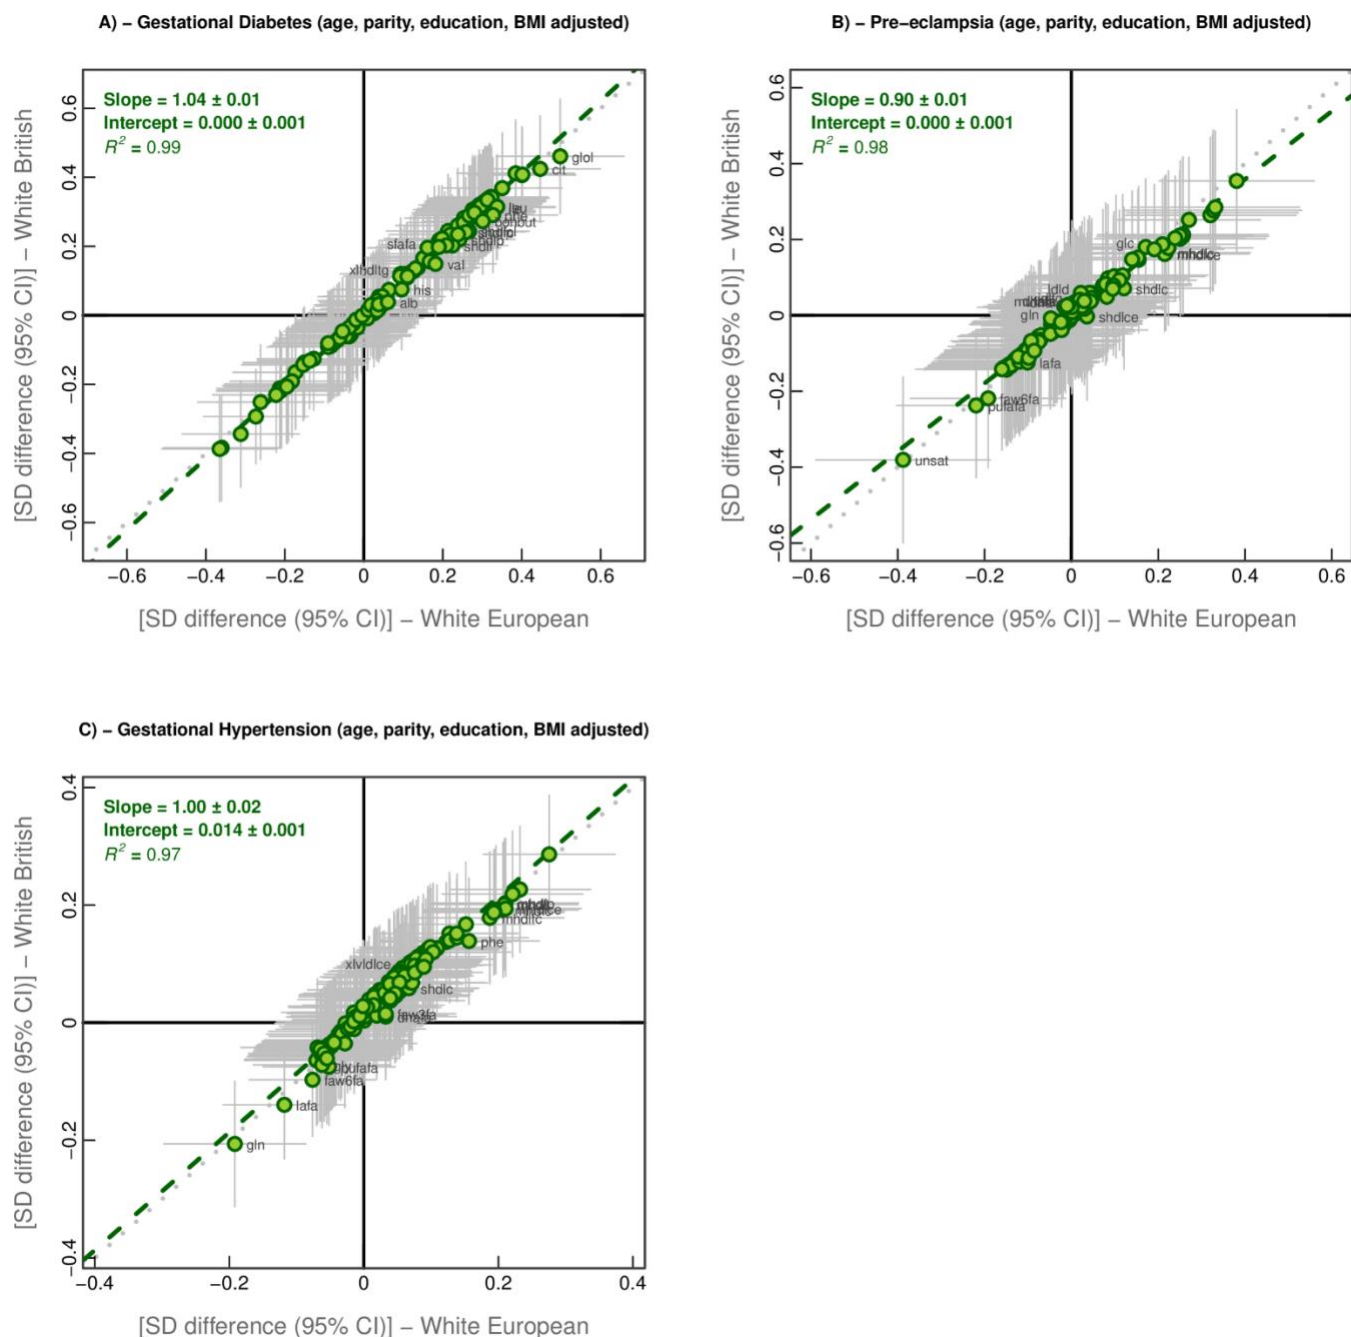

**Figure S33. Sensitivity Analysis 2: Linear fit between White European and White British age, parity, education and BMI-adjusted models (green dashed line) for maternal gestational diabetes (a), pre-eclampsia (b) and gestational hypertension (c).** Each green dot represents a metabolic trait. The positions of the dots are determined by difference in mean maternal metabolite (in SD units) for each increase of 1-SD maternal exposure in the main analyses ethnic group (x-axis) and difference in mean maternal metabolite (in SD units) for each increase in 1-SD maternal exposure in the sensitivity analysis ethnic group (y-axis). For dichotomous exposures, the differences are in SD units between the exposures and non-exposed. The horizontal grey lines on each dot denote the confidence intervals (CI) for main analyses associations and the vertical grey lines indicate the CI for sensitivity analysis estimates. A linear fit of the overall concordance (the similarity in magnitude between the two associations) is shown by the green dashed line. A slope of 1 with an intercept of 0 (dashed grey line), with all green dots sitting on that line, would indicate that results had the same magnitude and direction. The proportion of variance in main analysis associations that is explained by sensitivity ethnic group associations ( $R^2$ ) in these analyses provides a measure of goodness of linear fit, with higher values (closer to 1) indicating higher consistency.

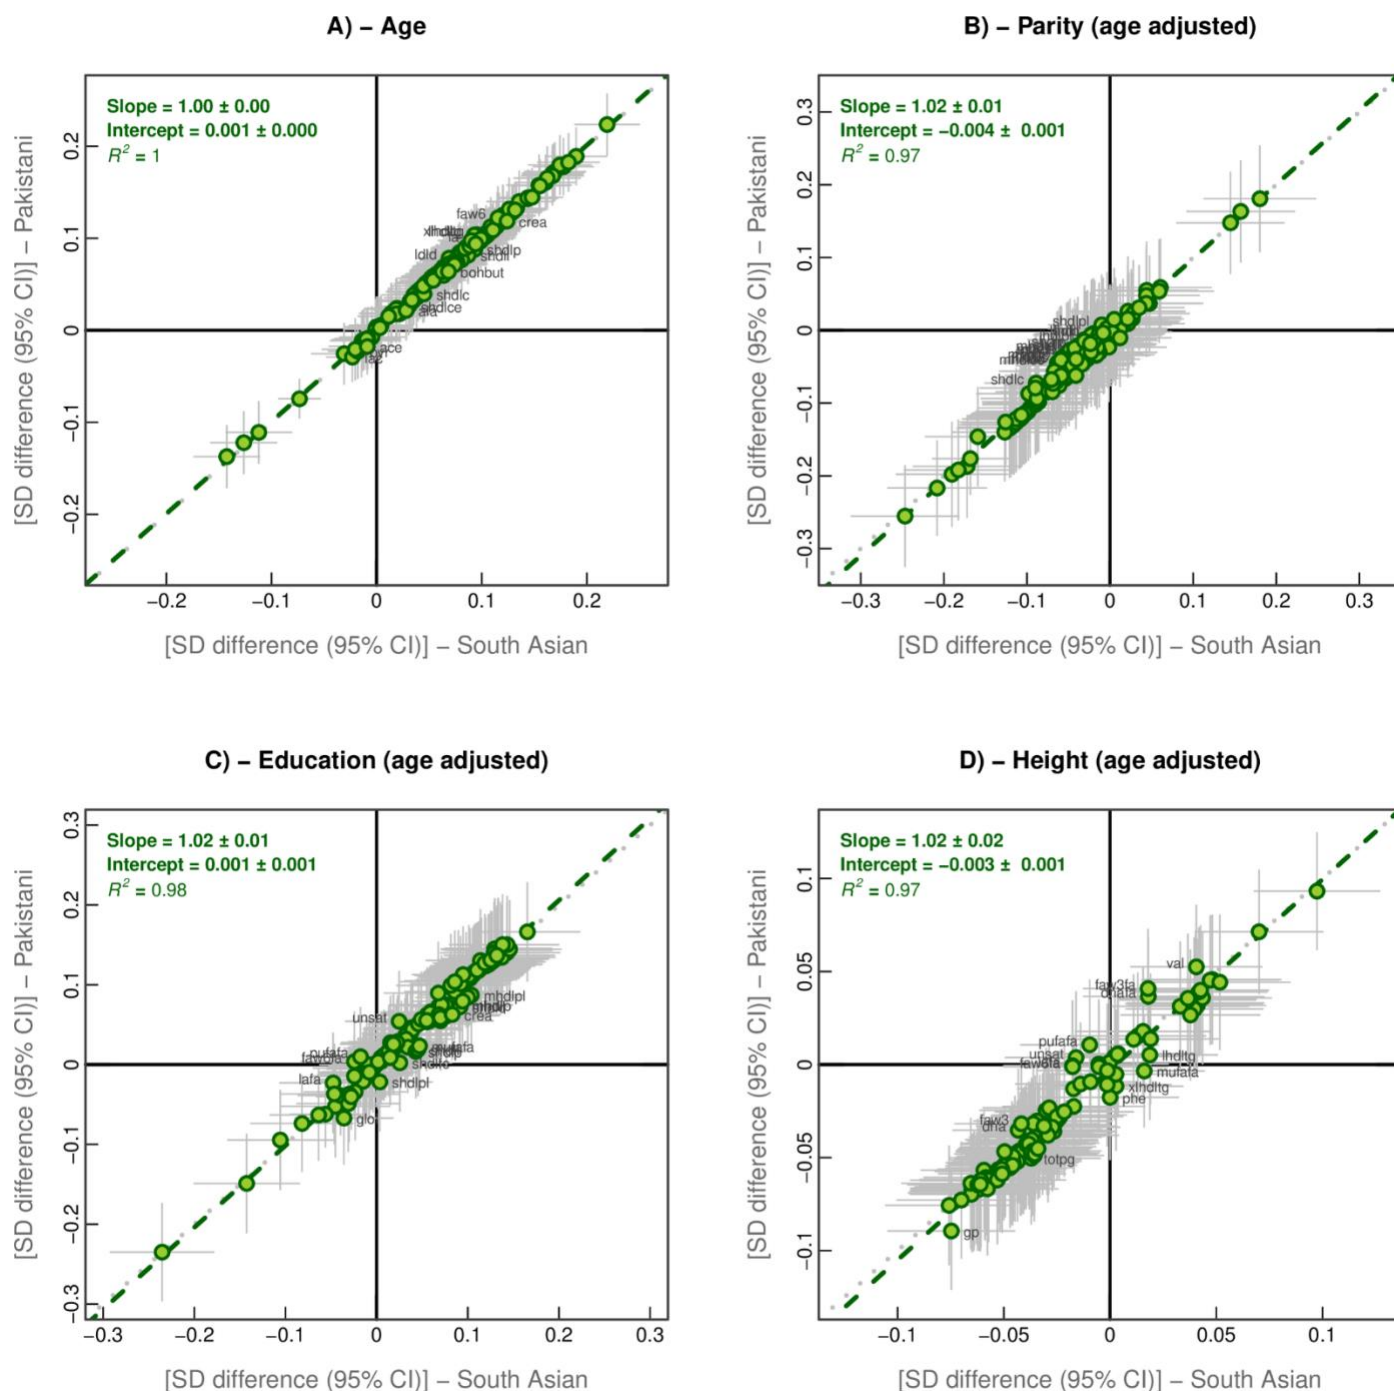

**Figure S34. Sensitivity Analysis 2: Linear fit between South Asian and Pakistani age-adjusted models (green dashed line) for maternal age (a), parity (b), education (c), and height (d).** Each green dot represents a metabolic trait. The positions of the dots are determined by difference in mean maternal metabolite (in SD units) for each increase of 1-SD maternal exposure in the main analyses ethnic group (x-axis) and difference in mean maternal metabolite (in SD units) for each increase in 1-SD maternal exposure in the sensitivity analysis ethnic group (y-axis). For dichotomous exposures, the differences are in SD units between the exposures and non-exposed. The horizontal grey lines on each dot denote the confidence intervals (CI) for main analyses associations and the vertical grey lines indicate the CI for sensitivity analysis estimates. A linear fit of the overall concordance (the similarity in magnitude between the two associations) is shown by the green dashed line. A slope of 1 with an intercept of 0 (dashed grey line), with all green dots sitting on that line, would indicate that results had the same magnitude and direction. The proportion of variance in main analysis associations that is explained by sensitivity ethnic group associations ( $R^2$ ) in these analyses provides a measure of goodness of linear fit, with higher values (closer to 1) indicating higher consistency.



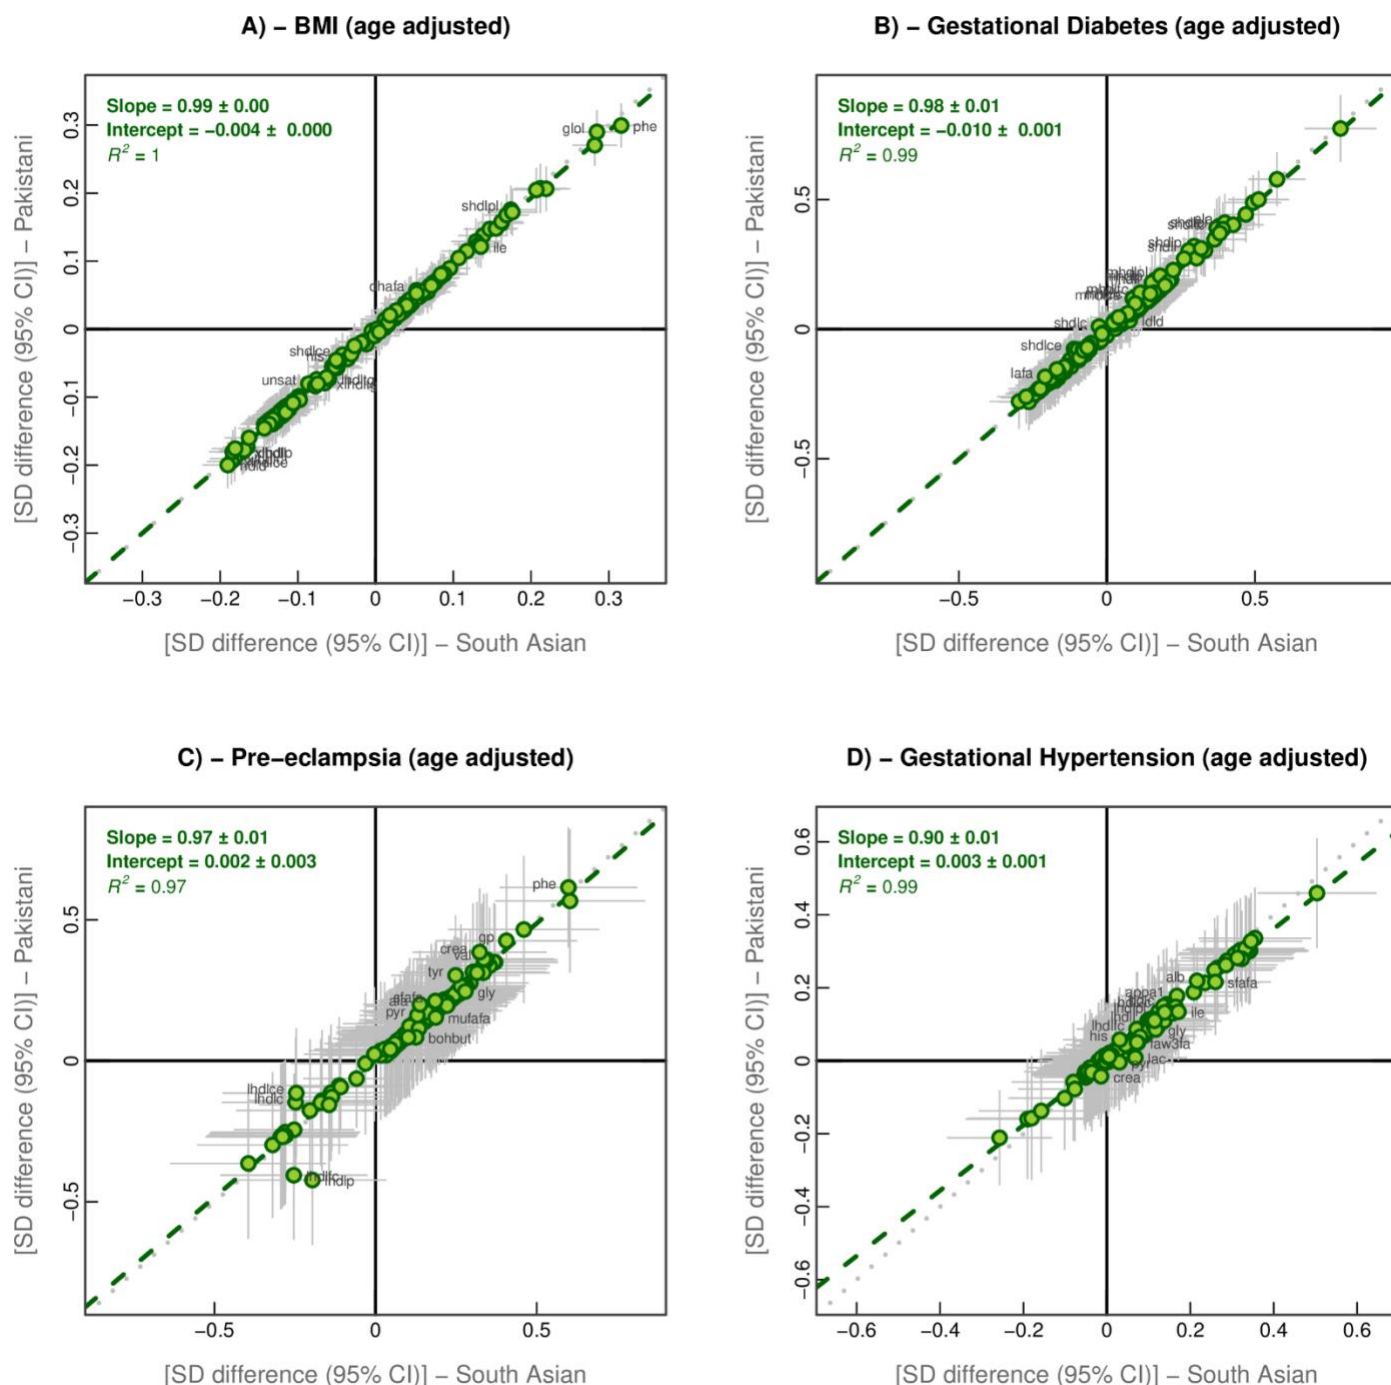

**Figure S35. Sensitivity Analysis 2: Linear fit between South Asian and Pakistani age-adjusted models (green dashed line) for maternal BMI (a), gestational diabetes (b), pre-eclampsia (c) and gestational hypertension (d).** Each green dot represents a metabolic trait. The positions of the dots are determined by difference in mean maternal metabolite (in SD units) for each increase of 1-SD maternal exposure in the main analyses ethnic group (x-axis) and difference in mean maternal metabolite (in SD units) for each increase in 1-SD maternal exposure in the sensitivity analysis ethnic group (y-axis). For dichotomous exposures, the differences are in SD units between the exposures and non-exposed. The horizontal grey lines on each dot denote the confidence intervals (CI) for main analyses associations and the vertical grey lines indicate the CI for sensitivity analysis estimates. A linear fit of the overall concordance (the similarity in magnitude between the two associations) is shown by the green dashed line. A slope of 1 with an intercept of 0 (dashed grey line), with all green dots sitting on that line, would indicate that results had the same magnitude and direction. The proportion of variance in main analysis associations that is explained by sensitivity ethnic group associations ( $R^2$ ) in these analyses provides a measure of goodness of linear fit, with higher values (closer to 1) indicating higher consistency.

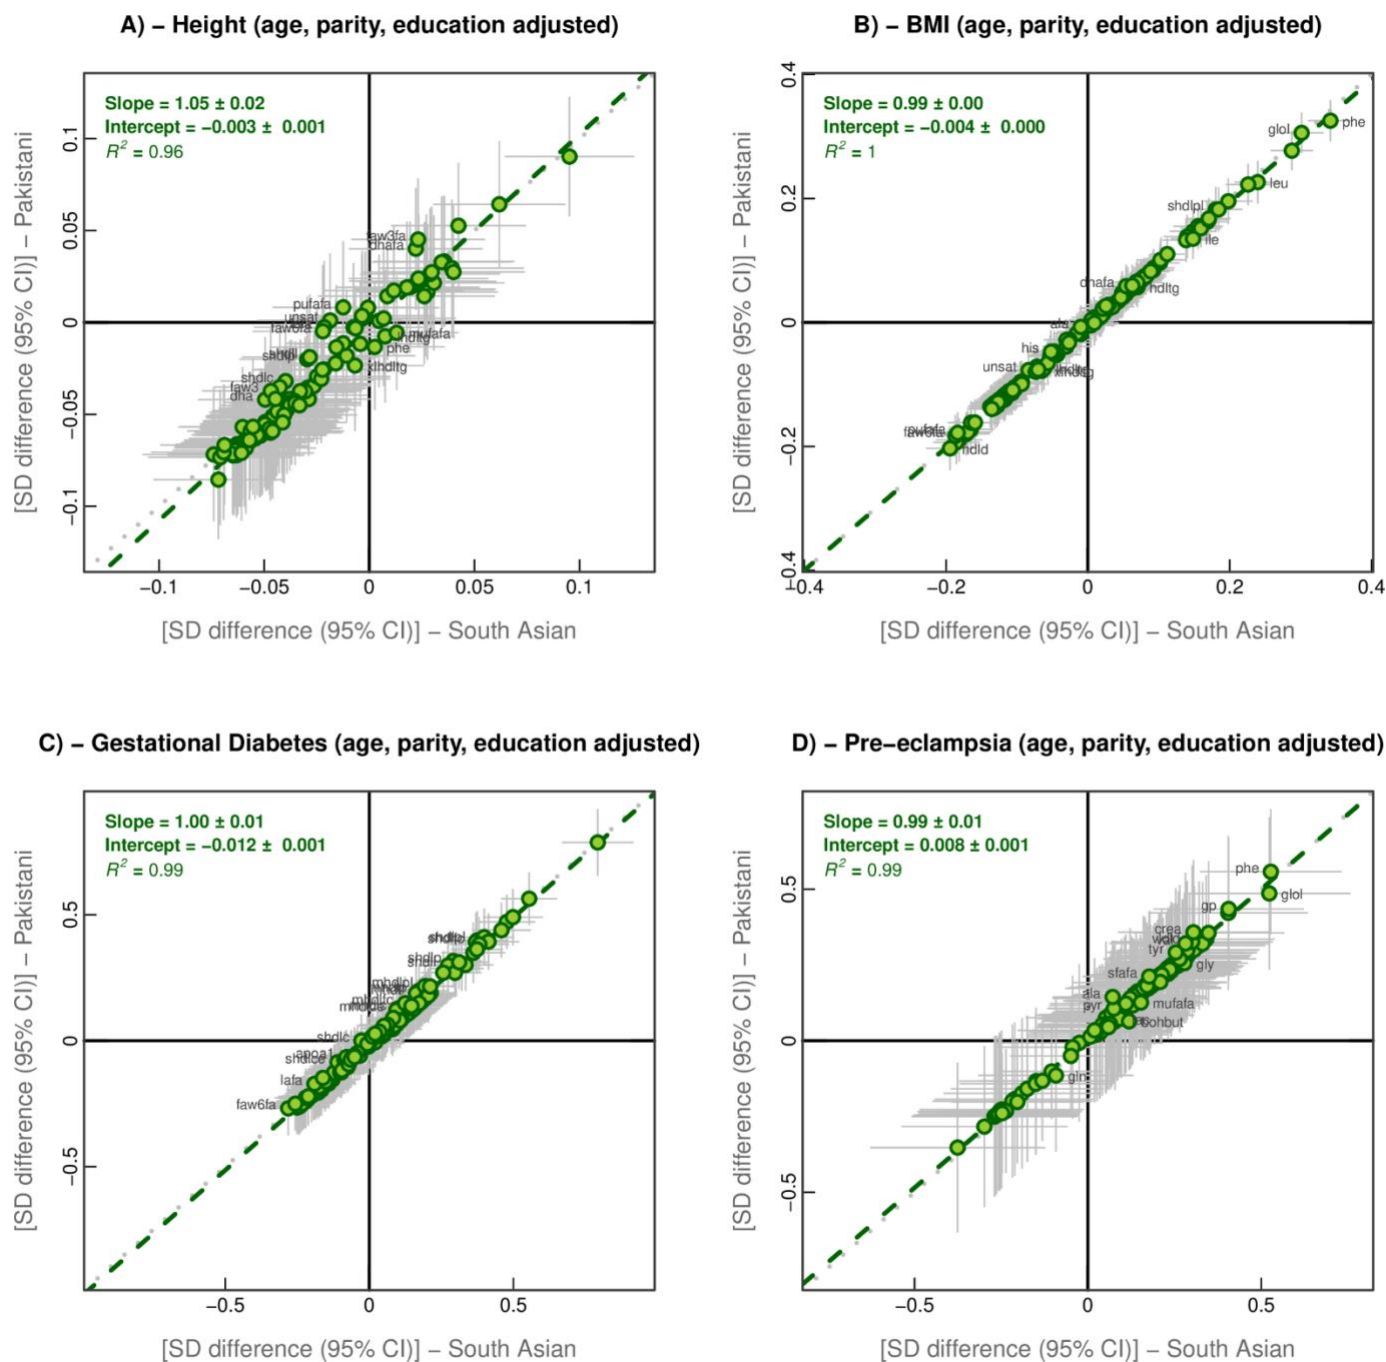

**Figure S36. Sensitivity Analysis 2: Linear fit between South Asian and Pakistani age, parity and education-adjusted models (green dashed line) for maternal height (a), BMI (b) gestational diabetes (c) and pre-eclampsia (d).** Each green dot represents a metabolic trait. The positions of the dots are determined by difference in mean maternal metabolite (in SD units) for each increase of 1-SD maternal exposure in the main analyses ethnic group (x-axis) and difference in mean maternal metabolite (in SD units) for each increase in 1-SD maternal exposure in the sensitivity analysis ethnic group (y-axis). For dichotomous exposures, the differences are in SD units between the exposures and non-exposed. The horizontal grey lines on each dot denote the confidence intervals (CI) for main analyses associations and the vertical grey lines indicate the CI for sensitivity analysis estimates. A linear fit of the overall concordance (the similarity in magnitude between the two associations) is shown by the green dashed line. A slope of 1 with an intercept of 0 (dashed grey line), with all green dots sitting on that line, would indicate that results had the same magnitude and direction. The proportion of variance in main analysis associations that is explained by sensitivity ethnic group associations ( $R^2$ ) in these analyses provides a measure of goodness of linear fit, with higher values (closer to 1) indicating higher consistency.

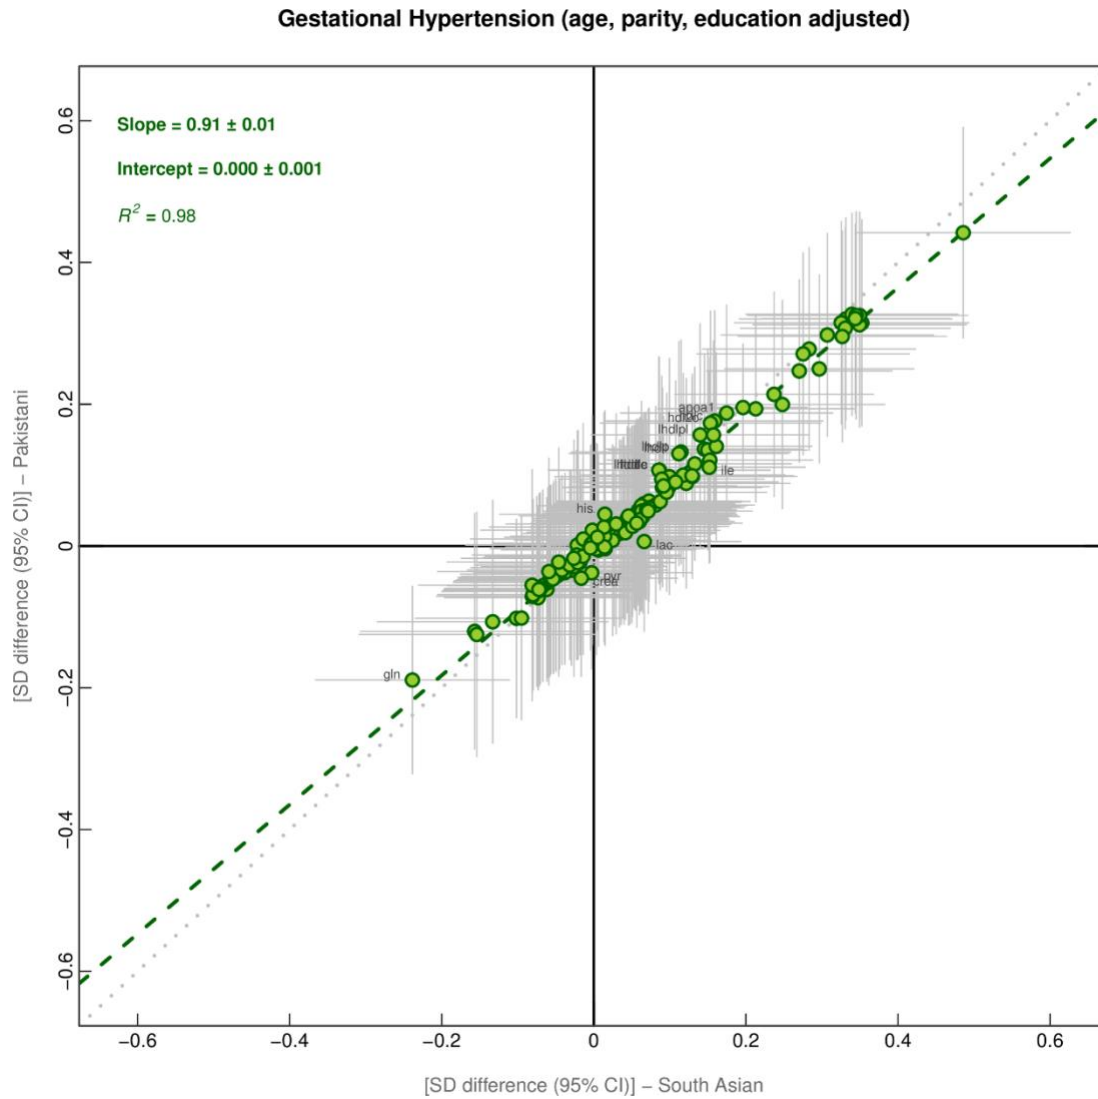

**Figure S37. Sensitivity Analysis 2: Linear fit between *South Asian* and *Pakistani* age, parity, education-adjusted models (green dashed line) for maternal gestational hypertension.** Each green dot represents a metabolic trait. The positions of the dots are determined by difference in mean maternal metabolite (in SD units) for each increase of 1-SD maternal exposure in the main analyses ethnic group (x-axis) and difference in mean maternal metabolite (in SD units) for each increase in 1-SD maternal exposure in the sensitivity analysis ethnic group (y-axis). For dichotomous exposures, the differences are in SD units between the exposures and non-exposed. The horizontal grey lines on each dot denote the confidence intervals (CI) for main analyses associations and the vertical grey lines indicate the CI for sensitivity analysis estimates. A linear fit of the overall concordance (the similarity in magnitude between the two associations) is shown by the green dashed line. A slope of 1 with an intercept of 0 (dashed grey line), with all green dots sitting on that line, would indicate that results had the same magnitude and direction. The proportion of variance in main analysis associations that is explained by sensitivity ethnic group associations ( $R^2$ ) in these analyses provides a measure of goodness of linear fit, with higher values (closer to 1) indicating higher consistency.

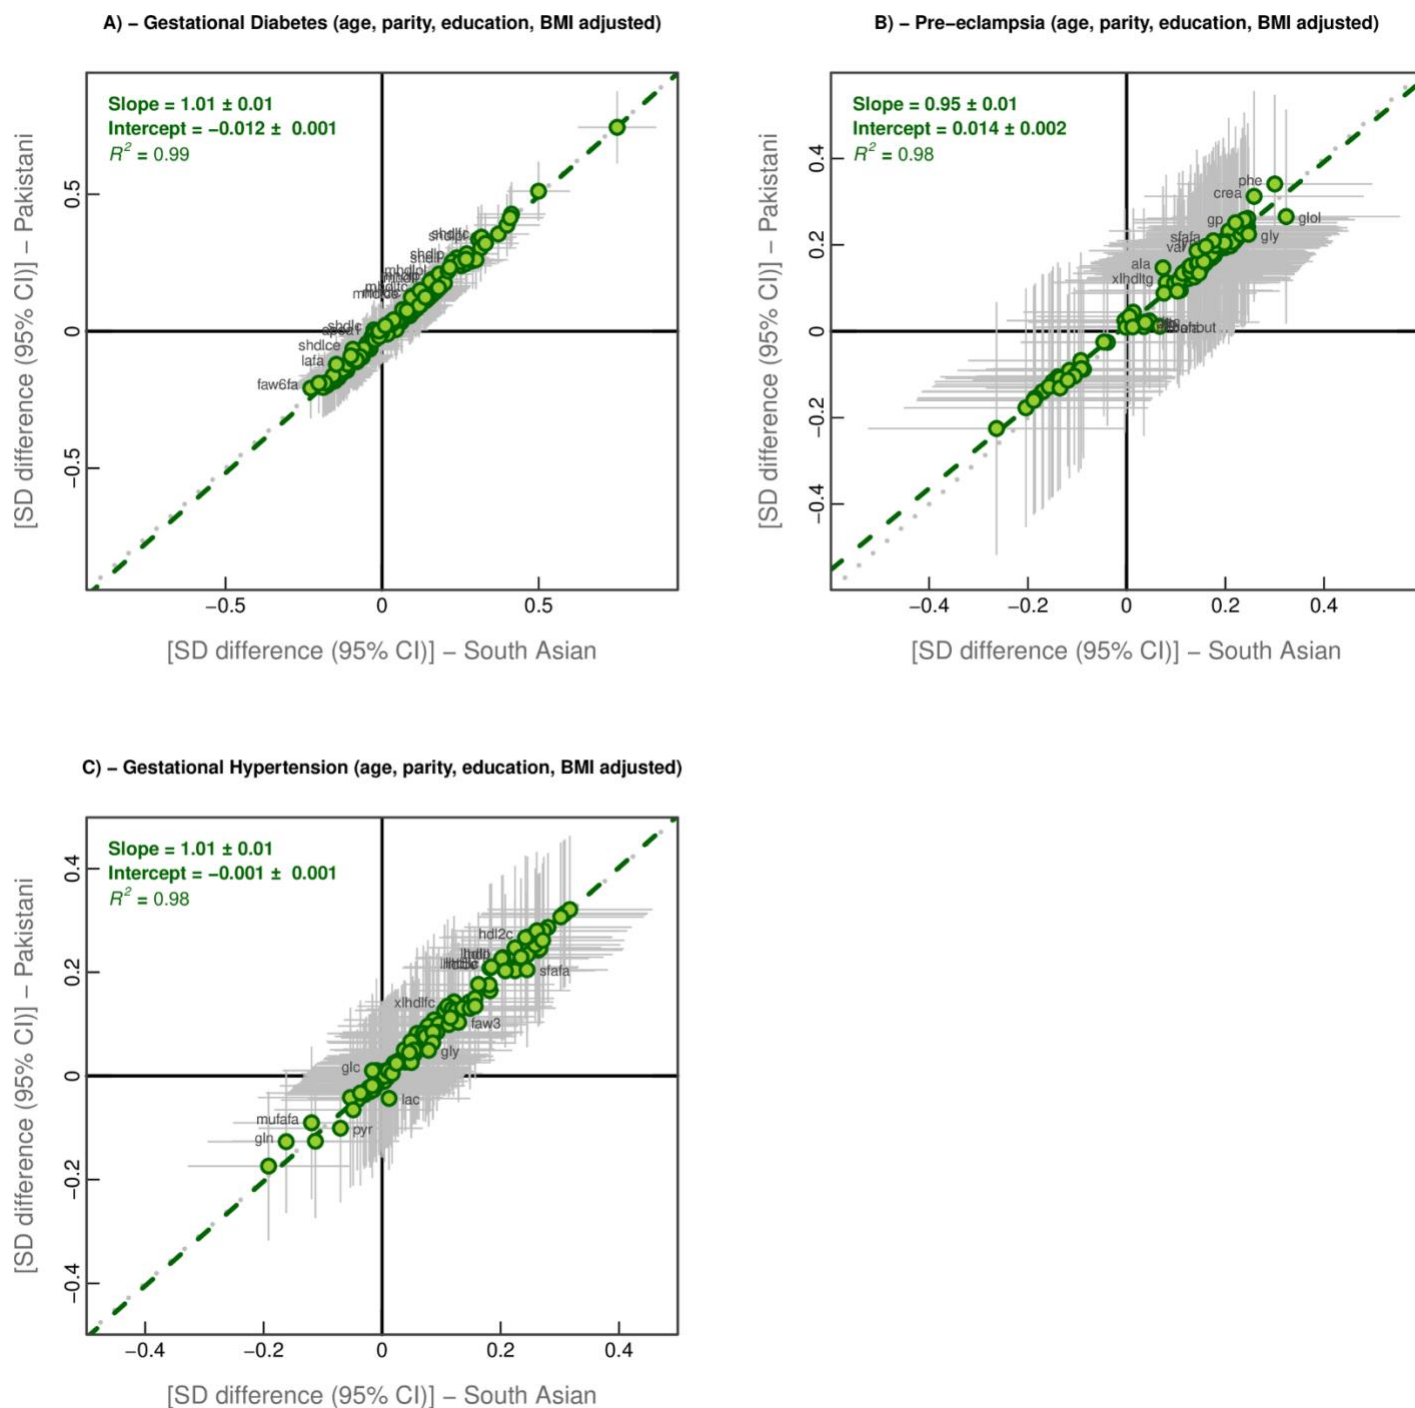

**Figure S38. Sensitivity Analysis 2: Linear fit between *South Asian* and *Pakistani* age, parity, education and BMI-adjusted models (green dashed line) for maternal gestational diabetes (a), pre-eclampsia (b) and gestational hypertension (c).** Each green dot represents a metabolic trait. The positions of the dots are determined by difference in mean maternal metabolite (in SD units) for each increase of 1-SD maternal exposure in the main analyses ethnic group (x-axis) and difference in mean maternal metabolite (in SD units) for each increase in 1-SD maternal exposure in the sensitivity analysis ethnic group (y-axis). For dichotomous exposures, the differences are in SD units between the exposures and non-exposed. The horizontal grey lines on each dot denote the confidence intervals (CI) for main analyses associations and the vertical grey lines indicate the CI for sensitivity analysis estimates. A linear fit of the overall concordance (the similarity in magnitude between the two associations) is shown by the green dashed line. A slope of 1 with an intercept of 0 (dashed grey line), with all green dots sitting on that line, would indicate that results had the same magnitude and direction. The proportion of variance in main analysis associations that is explained by sensitivity ethnic group associations ( $R^2$ ) in these analyses provides a measure of goodness of linear fit, with higher values (closer to 1) indicating higher consistency.
